# Supplementary material for: Computational study of the dimerization of glyphosate: mechanism and effect of solvent
Source: Royal Society of Chemistry journal article supplement (doi:10.1039/d4ra04300f), 2024-01-01
Supplement: d4ra04300f1.pdf [file d4ra04300f1.pdf]

Electronic Supplementary Material (ESI) for RSC Advances, published by the Royal Society of Chemistry.

## Computational Study of Glyphosate Dimerization Process: Mechanism and Effect of Solvent

Sondes MEDDEB-LIMEM<sup>a</sup> and Arij BEN FREDJ<sup>a,\*</sup>

<sup>a</sup>Unité de recherche de Modélisation en Sciences Fondamentales et Didactiques, équipe de Chimie Théorique et Réactivité UR14ES10. Institut Préparatoire aux études d'Ingénieurs d'El Manar, Université de Tunis El Manar, B.P.244, El Manar II 2092, Tunis, Tunisie.

| Contents                                                                                                                                                                                                                         | Page |
|----------------------------------------------------------------------------------------------------------------------------------------------------------------------------------------------------------------------------------|------|
| 1- Fig. S1                                                                                                                                                                                                                       | S2   |
| 2- Fig. S2                                                                                                                                                                                                                       | S3   |
| 3- Table S1                                                                                                                                                                                                                      | S4   |
| 4- Structures and energetics of Glyph monomers in cyclohexane, at SMD-B3LYP-D3/6-311++G(2d,2p) level.....                                                                                                                        | S5   |
| 5- Structures and energetics of Glyph dimers in the gas phase, at B3LYP-D3/6-311++ G(2d,2p) level.....                                                                                                                           | S13  |
| 6- Structures and energetics of Glyph dimers in cyclohexane at SMD-B3LYP-D3/6-311++ G(2d,2p) level.....                                                                                                                          | S26  |
| 7- Structures and energetics of Glyph dimers in aqueous solution, at SMD-B3LYP-D3/6-311++G(2d,2p) level.....                                                                                                                     | S41  |
| 8- Structures and energetics of transition states (TS) for DZP <sub>9</sub> and AC <sub>9</sub> conversions in the gas phase at B3LYP-D3/6-311++G(2d,2p) level.....                                                              | S72  |
| 9- Structures and energetics of transition states (TS) for DZP <sub>9</sub> and AC <sub>9</sub> conversions in cyclohexane at SMD-B3LYP-D3/6-311++G(2d,2p) level.....                                                            | S74  |
| 10- Structures and energetics of transition states (TS) involved in DZP <sub>9</sub> ⇌AC <sub>9</sub> ⇌DZC <sub>9</sub> tautomerization processes of Glyph dimers in aqueous solution at SMD-B3LYP-D3/6-311++G(2d,2p) level..... | S76  |

1-

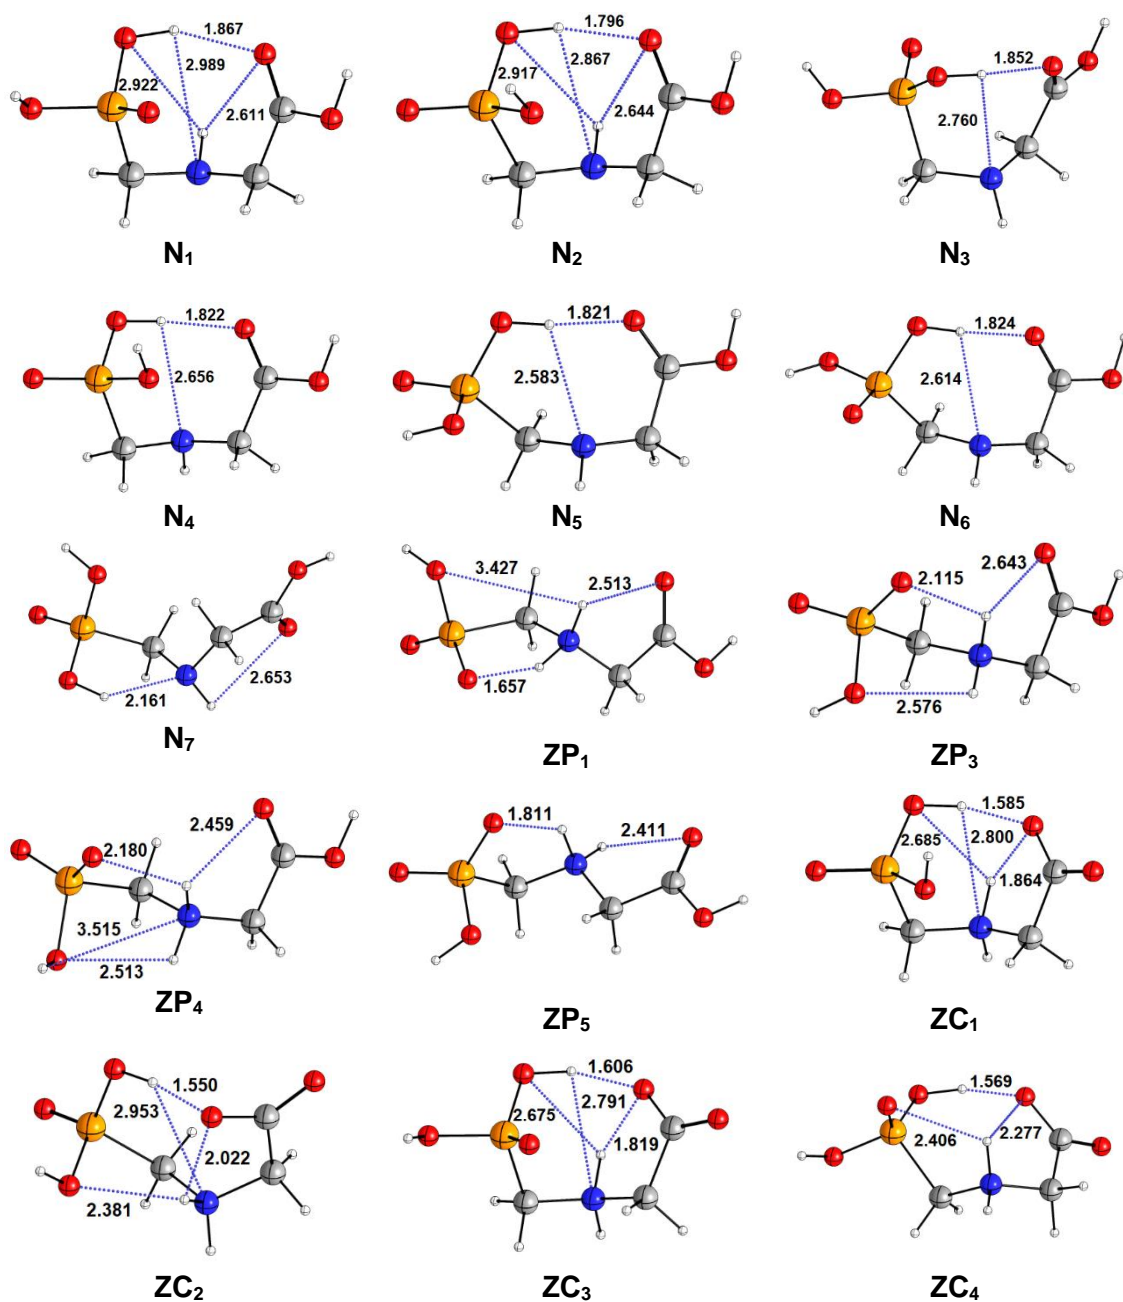

**Fig. S1** Optimized structures and hydrogen-bond distances (in Å) of the non-ionized (N) and ionized (ZP and ZC) neutral conformers of Glyph monomer obtained in cyclohexane at the SMD-B3LYP-D3/6-311++G(2d,2p) level.

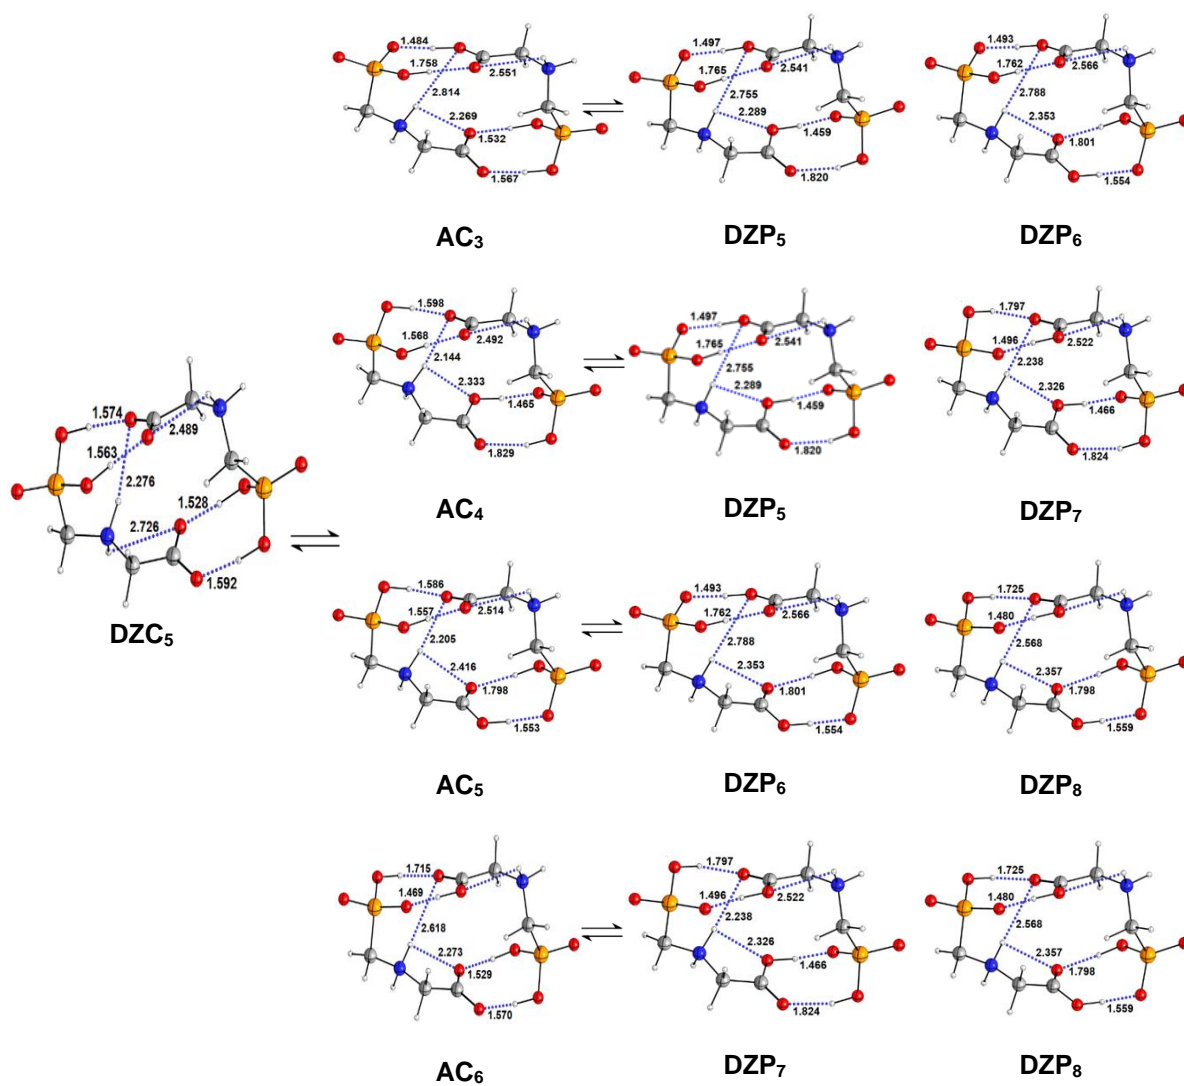

**Fig. S2** Structure of DZP and AC tautomers involved in the tautomerization process of DZC<sub>5</sub> in aqueous solution at SMD-B3LYP-D3/6-311++G(2d,2p) level.

**3- Table S1** Relative electronic energies (kcal/mol) with inclusion of zero-point energy (ZPE) contributions ( $\Delta(E+ZPE)$ ) and relative Gibbs free energies ( $\Delta G$ ) (kcal.mol<sup>-1</sup>) of the most stable non-ionized and ionized conformers of Glyph monomer calculated in the gas phase and in solution at B3LYP-D3/6-311++G(2d,2p) level and using the SMD model.

| Conformer             | Gas phase         |              | Cyclohexane     |            | Water             |              |
|-----------------------|-------------------|--------------|-----------------|------------|-------------------|--------------|
|                       | $\Delta(E+ZPE)^a$ | $\Delta G^a$ | $\Delta(E+ZPE)$ | $\Delta G$ | $\Delta(E+ZPE)^a$ | $\Delta G^a$ |
| <b>N<sub>1</sub></b>  | 0.0               | 0.0          | 0.0             | 0.0        | 4.4               | 5.5          |
| <b>N<sub>2</sub></b>  | 1.1               | 1.2          | 0.3             | 0.6        | 3.3               | 4.8          |
| <b>N<sub>3</sub></b>  | 2.1               | 2.2          | 1.7             | 1.7        | 6.0               | 7.0          |
| <b>N<sub>4</sub></b>  | 2.8               | 2.8          | 1.6             | 1.9        | 4.8               | 6.1          |
| <b>N<sub>5</sub></b>  | 3.7               | 3.3          | 2.1             | 2.0        | 4.8               | 6.3          |
| <b>N<sub>6</sub></b>  | 3.8               | 3.3          | 2.3             | 2.1        | 5.0               | 6.2          |
| <b>N<sub>7</sub></b>  | 4.0               | 2.9          | 2.9             | 1.8        | 6.1               | 6.0          |
| <b>ZP<sub>1</sub></b> | -                 | -            | 11.2            | 10.1       | 0.0               | 0.0          |
| <b>ZP<sub>2</sub></b> | -                 | -            | -               | -          | 0.2               | 0.2          |
| <b>ZP<sub>3</sub></b> | -                 | -            | 14.6            | 14.1       | 0.3               | 0.8          |
| <b>ZP<sub>4</sub></b> | -                 | -            | 15.5            | 14.8       | 0.5               | 0.9          |
| <b>ZP<sub>5</sub></b> | -                 | -            | 10.9            | 10.7       | 0.8               | 1.3          |
| <b>ZC<sub>1</sub></b> | -                 | -            | 10.0            | 10.5       | 1.0               | 2.4          |
| <b>ZC<sub>2</sub></b> | -                 | -            | 11.4            | 11.5       | 2.0               | 3.0          |
| <b>ZC<sub>3</sub></b> | -                 | -            | 11.2            | 11.5       | 2.5               | 3.9          |
| <b>ZC<sub>4</sub></b> | -                 | -            | 11.3            | 11.6       | 2.8               | 3.9          |

<sup>a</sup>Energies were taken from our previous work: O. Fliss, K. Essalah and A. Ben Fredj, *Phys. Chem. Chem. Phys.*, 2021, **23**, 26306-26323.

#### 4- Structures and energetics of Glyph monomers in cyclohexane, at SMD-B3LYP-D3/6-311++G(2d,2p) level.

N<sub>1</sub> structure in cyclohexane at SMD-B3LYP-D3/6-311++G(2d,2p).

E (SCF) = -891.721191802 u.a. ; Zero-point correction = 0.133529 u.a. ; G = -891.624830 u.a.  
at 298,15K.  $\Delta G_{\text{solv.tot.}} = -6.6 \text{ kcal.mol}^{-1}$  ;  $\Delta G_{\text{solv.el.}} = -4.6 \text{ kcal.mol}^{-1}$  ;  $E_{\text{nonel.}} = -1.93 \text{ kcal.mol}^{-1}$

Charge = 0; Multiplicity = 1

|   | Coordinates (Angstroms) |             |             |
|---|-------------------------|-------------|-------------|
|   | X                       | Y           | Z           |
| P | -1.35649700             | -0.24256800 | -0.14940100 |
| C | -0.83781700             | 1.51264200  | -0.10816600 |
| H | -1.54042300             | 2.05780500  | 0.52153700  |
| H | -0.94030500             | 1.90194900  | -1.12203200 |
| C | 1.61572400              | 1.15976700  | -0.34767200 |
| H | 1.39378600              | 1.12894000  | -1.41333400 |
| H | 2.51353100              | 1.77525800  | -0.23484300 |
| C | 2.02517800              | -0.23606800 | 0.09495600  |
| O | 1.63018700              | -0.80016000 | 1.09475400  |
| O | 2.95196600              | -0.76130500 | -0.71051700 |
| H | 3.18492700              | -1.64124700 | -0.37524400 |
| N | 0.51533500              | 1.75654200  | 0.37926800  |
| H | 0.58894100              | 1.57767000  | 1.37178400  |
| O | -2.95803000             | -0.14911800 | -0.24324300 |
| H | -3.32194000             | -0.87484500 | -0.76584600 |
| O | -1.14294000             | -0.77614200 | 1.34705200  |
| H | -0.18906500             | -0.92534600 | 1.49512100  |
| O | -0.70216500             | -1.04771200 | -1.20375900 |

N<sub>2</sub> structure in cyclohexane at SMD-B3LYP-D3/6-311++G(d,2p).

E(SCF) = -891.720831452 u.a. ; Zero-point correction = 0.133712 u.a. ; G = -891.623938 u.a.  
at 298,15K.

Charge = 0; Multiplicity = 1

|   | Coordinates (Angstroms) |             |             |
|---|-------------------------|-------------|-------------|
|   | X                       | Y           | Z           |
| P | -1.55421900             | -0.17939700 | -0.07867800 |
| C | -0.86225100             | 1.51826200  | -0.10080000 |
| H | -1.55310600             | 2.11701500  | 0.49327500  |
| H | -0.94006400             | 1.87889800  | -1.12729500 |
| C | 1.59743700              | 1.16065800  | -0.32735500 |
| H | 1.37808400              | 1.13316900  | -1.39403000 |
| H | 2.48531700              | 1.79052700  | -0.21390400 |
| C | 2.03395600              | -0.22976500 | 0.10244000  |
| O | 1.61136900              | -0.83850200 | 1.06393500  |
| O | 3.01711800              | -0.70293400 | -0.66998800 |
| H | 3.28187300              | -1.57258500 | -0.33119200 |
| N | 0.48835500              | 1.73253800  | 0.39877100  |
| H | 0.55684800              | 1.56367700  | 1.39269300  |
| O | -1.12586700             | -0.81806900 | 1.32292500  |
| H | -0.15140200             | -0.87531700 | 1.40462900  |
| O | -0.60272700             | -0.90308100 | -1.18009000 |
| H | -0.97939100             | -1.74002800 | -1.48071600 |
| O | -2.99966900             | -0.29080200 | -0.33683300 |

N<sub>3</sub> structure in cyclohexane at SMD-B3LYP-D3/6-311++G(2d,2p).

E(SCF) = -891.718419732 u.a. ; Zero-point correction = 0.133437 u.a. ; G = -891.622129 u.a.  
at 298,15K.

Charge = 0; Multiplicity = 1

|   | Coordinates (Angstroms) |             |             |
|---|-------------------------|-------------|-------------|
|   | X                       | Y           | Z           |
| P | 1.37878500              | -0.24726400 | -0.14647500 |
| C | 0.86204600              | 1.49973200  | -0.05941200 |
| H | 0.98827600              | 1.92416300  | -1.06415200 |
| H | 1.55444600              | 2.00489100  | 0.61274100  |
| C | -1.57919500             | 1.13290200  | -0.33124500 |
| H | -2.43919400             | 1.79969300  | -0.25103500 |
| H | -1.33637500             | 1.06401600  | -1.39698500 |
| C | -2.06824200             | -0.24084700 | 0.10034100  |
| O | -1.64720600             | -0.89989200 | 1.02396900  |
| O | -3.08346600             | -0.65158100 | -0.67267200 |
| H | -3.34752200             | -1.53695400 | -0.37884200 |
| N | -0.48647400             | 1.62722800  | 0.48011500  |
| H | -0.65643000             | 2.57124500  | 0.78639300  |
| O | 2.98277000              | -0.15352000 | -0.18267600 |
| H | 3.34477000              | -0.76123000 | -0.83916000 |
| O | 1.11740600              | -0.83363600 | 1.31147300  |
| H | 0.15051600              | -0.86951500 | 1.46870400  |
| O | 0.77767000              | -0.98995400 | -1.27502600 |

N<sub>4</sub> structure in cyclohexane at SMD-B3LYP-D3/6-311++G(2d,2p).

E(SCF) = -891.718728771 u.a. ; Zero-point correction = 0.133641 u.a. ; G = -891.621858u.a.  
at 298,15K.

Charge = 0; Multiplicity = 1

|   | Coordinates (Angstroms) |             |             |
|---|-------------------------|-------------|-------------|
|   | X                       | Y           | Z           |
| P | -1.57147100             | -0.18337000 | -0.07289700 |
| C | -0.87657700             | 1.50360900  | -0.09385900 |
| H | -1.56476200             | 2.09103500  | 0.51302600  |
| H | -0.94927900             | 1.87214100  | -1.12499300 |
| C | 1.57443300              | 1.14136700  | -0.30340900 |
| H | 1.36255000              | 1.09857900  | -1.37711800 |
| H | 2.42441800              | 1.81547200  | -0.18588800 |
| C | 2.06977400              | -0.23476700 | 0.10958900  |
| O | 1.62979700              | -0.92087800 | 1.00401400  |
| O | 3.11284900              | -0.61629000 | -0.64243200 |
| H | 3.39645800              | -1.49407500 | -0.34390300 |
| N | 0.45571000              | 1.60372700  | 0.48701600  |
| H | 0.61809500              | 2.53060400  | 0.84461600  |
| O | -1.12031000             | -0.84138500 | 1.30431600  |
| H | -0.14435700             | -0.81419900 | 1.40638500  |
| O | -0.64839500             | -0.88166400 | -1.21221800 |
| H | -0.98664300             | -1.75044200 | -1.46355900 |
| O | -3.02146000             | -0.27552400 | -0.31094900 |

N<sub>5</sub> structure in cyclohexane at SMD-B3LYP-D3/6-311++G(2d,2p).

E(SCF) = -891.717512239 u.a. ; Zero-point correction = 0.133252 u.a. ; G = -891.621664 u.a.  
at 298,15K.

Charge = 0; Multiplicity = 1

|   | Coordinates (Angstroms) |             |             |
|---|-------------------------|-------------|-------------|
|   | X                       | Y           | Z           |
| P | -1.76313300             | -0.17653100 | 0.13426900  |
| C | -0.45303700             | 0.93125000  | 0.75585900  |
| H | 0.04028800              | 0.40099800  | 1.57114700  |
| H | -0.92394700             | 1.81712100  | 1.19024600  |
| C | 1.89809100              | 1.17169900  | 0.00211900  |
| H | 2.46472400              | 1.73968500  | -0.73735100 |
| H | 2.16838400              | 1.58557800  | 0.98305500  |
| C | 2.42675300              | -0.25027000 | -0.04786900 |
| O | 1.78439300              | -1.23676700 | -0.33069500 |
| O | 3.72808700              | -0.30351100 | 0.26783700  |
| H | 4.01693000              | -1.22808100 | 0.21800900  |
| N | 0.49492400              | 1.22821200  | -0.31283800 |
| H | 0.24449800              | 2.05618900  | -0.82675700 |
| O | -0.98556900             | -1.43302900 | -0.44639300 |
| H | -0.02155400             | -1.29074500 | -0.55732700 |
| O | -2.30378700             | 0.60589900  | -1.17887100 |
| H | -3.25592800             | 0.74272300  | -1.10671900 |
| O | -2.84583900             | -0.49372400 | 1.08573100  |

N<sub>6</sub> structure in cyclohexane at SMD-B3LYP-D3/6-311++G(2d,2p).

E(SCF) = -891.717272920 u.a. ; Zero-point correction = 0.133219u.a. ; G = -891.621452 u.a.  
at 298,15K.

Charge = 0; Multiplicity = 1

|   | Coordinates (Angstroms) |             |             |
|---|-------------------------|-------------|-------------|
|   | X                       | Y           | Z           |
| P | -1.75117100             | -0.06932900 | -0.06309900 |
| C | -0.43267500             | 0.92468400  | 0.71186000  |
| H | 0.03343600              | 0.31244500  | 1.48408500  |
| H | -0.87630200             | 1.79297200  | 1.20702000  |
| C | 1.93188900              | 1.17169200  | 0.01857700  |
| H | 2.52653500              | 1.73755000  | -0.70006500 |
| H | 2.18962700              | 1.56460000  | 1.01194300  |
| C | 2.42823700              | -0.26127400 | -0.03823300 |
| O | 1.76670400              | -1.23101100 | -0.33551300 |
| O | 3.72360900              | -0.34735800 | 0.29389100  |
| H | 3.99194400              | -1.27779500 | 0.23928300  |
| N | 0.53775400              | 1.26205100  | -0.32551500 |
| H | 0.30783800              | 2.11848600  | -0.80185400 |
| O | -2.61854600             | -0.63381400 | 1.17797700  |
| H | -3.53573100             | -0.34622900 | 1.09859500  |
| O | -1.00377100             | -1.37796500 | -0.56867400 |
| H | -0.03176600             | -1.26993400 | -0.63560100 |
| O | -2.57637000             | 0.66050700  | -1.04662400 |

N<sub>7</sub> structure in cyclohexane at SMD-B3LYP-D3/6-311++G(2d,2p).

E(SCF) = -891.716351102 u.a. ; Zero-point correction = 0.133358 u.a. ; G = -891.621910 u.a.  
at 298,15K.

Charge = 0; Multiplicity = 1

| Coordinates (Angstroms) |             |             |             |
|-------------------------|-------------|-------------|-------------|
|                         | X           | Y           | Z           |
| C                       | 1.46170100  | 0.00308700  | 0.89154700  |
| H                       | 0.99047000  | 0.98455600  | 0.90803700  |
| H                       | 1.89187000  | -0.15120100 | 1.88339300  |
| C                       | 2.61779400  | 0.02556000  | -0.09592200 |
| O                       | 3.38321400  | 1.12170600  | 0.06601400  |
| O                       | 2.84858600  | -0.83407000 | -0.90867000 |
| N                       | 0.47546100  | -1.02903100 | 0.62113800  |
| H                       | -1.40097300 | -0.83109600 | 1.67423000  |
| C                       | -0.33041500 | -0.82018600 | -0.59269600 |
| H                       | 0.19504600  | -0.31066700 | -1.40337900 |
| H                       | -0.66072800 | -1.78553300 | -0.97353800 |
| P                       | -1.85752600 | 0.08897600  | -0.17760200 |
| O                       | -2.96906300 | 0.06170600  | -1.14250400 |
| O                       | -1.29571000 | 1.58068600  | 0.11307400  |
| O                       | -2.22643300 | -0.51491500 | 1.26094900  |
| H                       | 0.93343300  | -1.92898800 | 0.56485400  |
| H                       | -1.95535600 | 2.25095100  | -0.10579000 |
| H                       | 4.12167400  | 1.06888200  | -0.56021700 |

ZP<sub>1</sub> structure in cyclohexane at SMD-B3LYP-D3/6-311++G(2d,2p).

E(SCF) = -891.705211261 u.a. ; Zero-point correction = 0.135322 u.a. ; G = -891.608704 u.a.  
at 298,15K.  $\Delta G_{\text{solv.tot.}} = -24.0 \text{ kcal.mol}^{-1}$  ;  $\Delta G_{\text{solv.el}} = -21.7 \text{ kcal.mol}^{-1}$  ;  $E_{\text{nonel.}} = -2.3 \text{ kcal.mol}^{-1}$

Charge = 0; Multiplicity = 1

| Coordinates (Angstroms) |             |             |             |
|-------------------------|-------------|-------------|-------------|
|                         | X           | Y           | Z           |
| P                       | 2.05175600  | -0.10528000 | 0.14324200  |
| C                       | 0.27625400  | 0.39155400  | 0.48505500  |
| H                       | 0.10268300  | 1.45896400  | 0.55521000  |
| H                       | -0.04518800 | -0.09403400 | 1.40190600  |
| C                       | -1.78741300 | -0.86318700 | -0.33329200 |
| H                       | -2.12685200 | -1.43237900 | -1.19942500 |
| H                       | -1.62102100 | -1.56125800 | 0.48297600  |
| C                       | -2.85040900 | 0.15334900  | 0.02230900  |
| O                       | -2.76022600 | 1.33055700  | -0.21246700 |
| O                       | -3.90598600 | -0.43456000 | 0.59504200  |
| H                       | -4.58063300 | 0.24097200  | 0.77020200  |
| N                       | -0.51417700 | -0.19256300 | -0.66488300 |
| H                       | 0.21173400  | -0.87334600 | -1.05601500 |
| O                       | 2.78758200  | -0.23962700 | 1.42565000  |
| O                       | 2.62223100  | 1.17595900  | -0.70232600 |
| H                       | 3.23009800  | 1.67761300  | -0.14743300 |
| O                       | 1.81871400  | -1.22087100 | -0.85330600 |
| H                       | -0.67704400 | 0.52864400  | -1.36704800 |



ZP<sub>3</sub> structure in cyclohexane at SMD-B3LYP-D3/6-311++G(2d,2p).

E(SCF) = -891.700722395 u.a. ; Zero-point correction = 0.136325 u.a. ; G = -891.602425 u.a.  
at 298,15K.

Charge = 0; Multiplicity = 1

|   | Coordinates (Angstroms) |             |             |
|---|-------------------------|-------------|-------------|
|   | X                       | Y           | Z           |
| P | -1.97220400             | -0.26163600 | 0.03266900  |
| C | -0.33079400             | 0.21072700  | 0.78140200  |
| H | 0.17466000              | -0.66958200 | 1.16721500  |
| H | -0.39450800             | 0.98300300  | 1.54251600  |
| C | 1.89886200              | 1.06970700  | -0.10990900 |
| H | 2.28637800              | 1.67618400  | -0.92870700 |
| H | 1.96723700              | 1.64352600  | 0.81047900  |
| C | 2.71948500              | -0.20082200 | -0.02367700 |
| O | 2.33295700              | -1.27514900 | -0.39681300 |
| O | 3.92894600              | 0.05072400  | 0.48979000  |
| H | 4.44221600              | -0.77330000 | 0.49159500  |
| N | 0.47814400              | 0.73679300  | -0.37778100 |
| H | -0.00718500             | 1.55825400  | -0.74304100 |
| O | -1.54969600             | -0.85364900 | -1.27605100 |
| O | -2.52770300             | 1.26347700  | -0.30151500 |
| H | -3.19226300             | 1.50735600  | 0.35231800  |
| O | -2.82670000             | -0.89170600 | 1.07030700  |
| H | 0.37175800              | 0.01431000  | -1.11059300 |

ZP<sub>4</sub> structure in cyclohexane at SMD-B3LYP-D3/6-311++G(2d,2p).

E(SCF) = -891.699191276 u.a. ; Zero-point correction = 0.136201 u.a. ; G = -891.601193 u.a.  
at 298,15K.

Charge = 0; Multiplicity = 1

|   | Coordinates (Angstroms) |             |             |
|---|-------------------------|-------------|-------------|
|   | X                       | Y           | Z           |
| P | -1.97591400             | -0.25961400 | 0.05171300  |
| C | -0.32454700             | 0.14199800  | 0.79842500  |
| H | 0.17919600              | -0.76960500 | 1.10438400  |
| H | -0.38029700             | 0.84820600  | 1.62142500  |
| C | 1.89544800              | 1.07149000  | -0.03922800 |
| H | 2.28036300              | 1.73614600  | -0.81291500 |
| H | 1.97117600              | 1.57524000  | 0.92056900  |
| C | 2.71083300              | -0.20516100 | -0.05489100 |
| O | 2.32309100              | -1.24151700 | -0.52271700 |
| O | 3.91574100              | -0.00511700 | 0.48992500  |
| H | 4.42508000              | -0.82923900 | 0.42653100  |
| N | 0.47120400              | 0.76466400  | -0.32102200 |
| H | -0.02194900             | 1.61584700  | -0.59791400 |
| O | -1.63457800             | -0.73768300 | -1.33227700 |
| O | -2.46836700             | 1.32513800  | -0.10016500 |
| H | -2.92444500             | 1.42717000  | -0.94326600 |
| O | -2.79084200             | -0.99427200 | 1.04565200  |
| H | 0.36039200              | 0.11543900  | -1.11653700 |

ZP<sub>5</sub> structure in cyclohexane at SMD-B3LYP-D3/6-311++G(2d,2p).

E(SCF) = -891.706160627 u.a. ; Zero-point correction = 0.135939 u.a. ; G = -891.607774 u.a.  
at 298,15K.

Charge = 0; Multiplicity = 1

|   | Coordinates (Angstroms) |             |             |
|---|-------------------------|-------------|-------------|
|   | X                       | Y           | Z           |
| P | 1.95240100              | 0.03299300  | 0.19698800  |
| C | 0.83407500              | -0.85306100 | -1.01513800 |
| H | 1.18901300              | -1.87412200 | -1.12568700 |
| H | 0.74385900              | -0.38508600 | -1.99029200 |
| C | -1.35818900             | 0.28846100  | -0.54081100 |
| H | -0.87334200             | 1.13824100  | -0.06604300 |
| H | -1.45050600             | 0.49669400  | -1.60588300 |
| C | -2.73050000             | 0.04088200  | 0.04178400  |
| O | -3.11314600             | -1.03623700 | 0.42357300  |
| O | -3.46068900             | 1.15890800  | 0.04734000  |
| H | -4.33778500             | 0.95580200  | 0.40990900  |
| N | -0.51329100             | -0.91535200 | -0.34112000 |
| H | -1.04222300             | -1.75218500 | -0.58303800 |
| O | 1.22397400              | -0.25215100 | 1.48510500  |
| H | -0.23538100             | -0.94898900 | 0.67078200  |
| O | 1.65781300              | 1.60832100  | -0.17749000 |
| H | 2.43107600              | 1.97982200  | -0.61674500 |
| O | 3.36829800              | -0.29825300 | -0.10040300 |

ZC<sub>1</sub> structure in cyclohexane at SMD-B3LYP-D3/6-311++G(2d,2p).

E(SCF) = -891.706557500 u.a. ; Zero-point correction = 0.134792 u.a. ; G = -891.608080 u.a.  
at 298,15K.

Charge = 0; Multiplicity = 1

|   | Coordinates (Angstroms) |             |             |
|---|-------------------------|-------------|-------------|
|   | X                       | Y           | Z           |
| P | -1.51001800             | -0.21834600 | -0.05987500 |
| C | -0.82606500             | 1.49101000  | -0.04706400 |
| H | -1.42094600             | 2.05251100  | 0.67020300  |
| H | -0.95654400             | 1.93195400  | -1.03219200 |
| C | 1.65336800              | 1.01322500  | -0.55554500 |
| H | 1.24280800              | 0.88487500  | -1.54983800 |
| H | 2.50814800              | 1.68310700  | -0.58980900 |
| C | 2.08393400              | -0.35374100 | 0.04577800  |
| O | 1.57521600              | -0.59893200 | 1.19605000  |
| O | 2.86111400              | -1.01956600 | -0.61930100 |
| N | 0.61430800              | 1.62313900  | 0.35556100  |
| H | 0.81745700              | 2.60536500  | 0.52755800  |
| O | -0.97865100             | -0.94444900 | 1.23287600  |
| H | 0.03337900              | -0.95544400 | 1.27850800  |
| O | -0.66997100             | -0.81957800 | -1.29385300 |
| H | -0.65906000             | -1.78501600 | -1.33187300 |
| O | -2.97035800             | -0.17913700 | -0.19775100 |
| H | 0.77866000              | 1.08619200  | 1.23345100  |

ZC<sub>2</sub> structure in cyclohexane at SMD-B3LYP-D3/6-311++G(2d,2p).

E(SCF) = -891.704082884 u.a. ; Zero-point correction = 0.134664 u.a. ; G = -891.606488 u.a.  
at 298,15K.

Charge = 0; Multiplicity = 1

|   | Coordinates (Angstroms) |             |             |
|---|-------------------------|-------------|-------------|
|   | X                       | Y           | Z           |
| P | 1.62186600              | -0.17022700 | -0.16278100 |
| C | 0.50383200              | 1.23166400  | -0.57425700 |
| H | 0.10878700              | 1.07783000  | -1.57413900 |
| H | 1.11113400              | 2.13242300  | -0.57966800 |
| C | -2.01641700             | 1.11975900  | -0.15191700 |
| H | -2.74153200             | 1.66997400  | 0.44384300  |
| H | -2.08176300             | 1.43785800  | -1.18681400 |
| C | -2.28187000             | -0.40178100 | 0.00505900  |
| O | -1.43768200             | -0.99687700 | 0.75882400  |
| O | -3.26613600             | -0.84045600 | -0.56934900 |
| N | -0.64513100             | 1.43377400  | 0.38702900  |
| H | -0.60844300             | 2.37864200  | 0.76195200  |
| O | 0.82292300              | -1.51268300 | -0.30062000 |
| H | -0.09901700             | -1.45649600 | 0.12721600  |
| O | 1.73967800              | 0.12661700  | 1.42586500  |
| H | 2.04100800              | -0.63584000 | 1.93650900  |
| O | 2.86168000              | -0.09568900 | -0.94453200 |
| H | -0.53922600             | 0.76744800  | 1.16880200  |

ZC<sub>3</sub> structure in cyclohexane at SMD-B3LYP-D3/6-311++G(2d,2p).

E(SCF) = -891.704377228 u.a. ; Zero-point correction = 0.134487 u.a. ; G = -891.606493 u.a.  
at 298,15K.

Charge = 0; Multiplicity = 1

|   | Coordinates (Angstroms) |             |             |
|---|-------------------------|-------------|-------------|
|   | X                       | Y           | Z           |
| P | -1.38380700             | -0.26647800 | -0.15045800 |
| C | -0.80748000             | 1.47476300  | 0.07170100  |
| H | -1.35070000             | 1.92210900  | 0.90122100  |
| H | -1.01195100             | 2.03196100  | -0.83899200 |
| C | 1.62550100              | 0.96257500  | -0.60927800 |
| H | 1.11487200              | 0.74817900  | -1.54220400 |
| H | 2.43412800              | 1.66680600  | -0.77772200 |
| C | 2.18013200              | -0.35127200 | 0.01696800  |
| O | 1.66567400              | -0.63880200 | 1.15651900  |
| O | 3.03615700              | -0.93815500 | -0.62195300 |
| N | 0.65498900              | 1.57032900  | 0.38050800  |
| H | 0.86587000              | 0.99348300  | 1.22705600  |
| O | -2.95352200             | -0.09399600 | 0.11990700  |
| H | -3.47089100             | -0.44854500 | -0.61429100 |
| O | -0.89823500             | -1.01535200 | 1.14330400  |
| H | 0.11178300              | -1.04387600 | 1.19401000  |
| O | -1.02541700             | -0.80397200 | -1.47332700 |
| H | 0.89290600              | 2.54056400  | 0.57228200  |

ZC<sub>4</sub> structure in cyclohexane at SMD-B3LYP-D3/6-311++G(2d,2p).

E(SCF) = -891.704871842 u.a. ; Zero-point correction = 0.135218 u.a. ; G = -891.606423 u.a.  
at 298,15K.

Charge = 0; Multiplicity = 1

|   | Coordinates (Angstroms) |             |             |
|---|-------------------------|-------------|-------------|
|   | X                       | Y           | Z           |
| P | 1.55308700              | -0.14392200 | 0.05374900  |
| C | 0.35688600              | 0.99636300  | -0.76579800 |
| H | -0.16050200             | 0.51284300  | -1.58860800 |
| H | 0.89786100              | 1.85933900  | -1.14293800 |
| C | -2.08567800             | 1.11667400  | -0.09569700 |
| H | -2.73037000             | 1.63131200  | 0.61432600  |
| H | -2.29874500             | 1.46603900  | -1.10077700 |
| C | -2.29419400             | -0.41639300 | 0.03498800  |
| O | -1.39480000             | -1.00551200 | 0.71567400  |
| O | -3.30382700             | -0.86349800 | -0.49352200 |
| N | -0.66305800             | 1.47043700  | 0.24473600  |
| H | -0.56541000             | 2.47457100  | 0.38187900  |
| O | 2.78480500              | -0.20463600 | -0.96596900 |
| H | 3.56211500              | 0.23678300  | -0.60182100 |
| O | 0.95538500              | -1.58275700 | -0.08199300 |
| H | -0.00891100             | -1.56127500 | 0.23329300  |
| O | 1.86317200              | 0.41191400  | 1.38825100  |
| H | -0.45091000             | 1.02220600  | 1.14478600  |

**5- Structures and energetics of Glyph dimers in the gas phase, at B3LYP-D3/6-311++G(2d,2p) level.**

DZC<sub>1</sub> structure in the gas-phase at B3LYP-D3/6-311++G(2d,2p).

E(SCF) = -1783.45995522 u.a. ; Zero-point correction = 0.274017 u.a. ; G = -1783.237450 u.a. at 298,15K.

Charge = 0; Multiplicity = 1

|   | Coordinates (Angstroms) |             |             |
|---|-------------------------|-------------|-------------|
|   | X                       | Y           | Z           |
| P | 3.43757300              | -0.05883000 | 0.17216500  |
| C | 2.13850500              | 0.87748800  | -0.74107000 |
| H | 1.19992000              | 0.33532600  | -0.79512100 |
| H | 2.48887000              | 1.14246000  | -1.73443400 |
| C | 0.85598400              | 3.03828400  | -0.55642400 |
| H | 0.95592600              | 4.02766700  | -0.11359000 |
| H | 0.99541900              | 3.10310300  | -1.63016900 |
| C | -0.52472400             | 2.45171900  | -0.19347000 |
| O | -0.52055600             | 1.73335500  | 0.84190000  |
| O | -1.47121200             | 2.73265800  | -0.94621500 |
| H | -2.88417100             | 1.95502500  | -0.75853500 |
| N | 1.89704200              | 2.13883800  | 0.03537700  |
| H | 2.80220000              | 2.59184100  | 0.18314000  |
| O | 3.68212300              | -1.34334600 | -0.69191200 |
| O | 2.69344100              | -0.44754400 | 1.51279900  |
| H | 1.88034500              | -1.01269500 | 1.35043800  |
| O | 4.57378400              | 0.85662600  | 0.36763200  |
| H | 1.51569300              | 1.85748400  | 0.95209500  |
| P | -3.43757100             | 0.05866600  | 0.17211800  |
| C | -2.13932200             | -0.87807800 | -0.74190700 |
| H | -1.20081800             | -0.33589400 | -0.79729800 |
| H | -2.49057900             | -1.14374100 | -1.73476900 |
| C | -0.85584200             | -3.03832000 | -0.55647100 |
| H | -0.95549700             | -4.02757700 | -0.11330000 |
| H | -0.99538600             | -3.10353000 | -1.63017900 |
| C | 0.52478800              | -2.45138400 | -0.19381000 |
| O | 0.52058700              | -1.73242100 | 0.84110500  |
| O | 1.47126600              | -2.73248900 | -0.94657500 |
| H | 2.88338500              | -1.95501600 | -0.75881500 |
| N | -1.89703500             | -2.13890500 | 0.03516000  |
| H | -2.80195900             | -2.59216500 | 0.18354100  |
| O | -3.68253600             | 1.34311300  | -0.69210400 |
| O | -2.69241000             | 0.44736200  | 1.51208200  |
| H | -1.87935600             | 1.01289800  | 1.34965500  |
| O | -4.57385700             | -0.85651800 | 0.36837300  |
| H | -1.51543800             | -1.85686400 | 0.95158100  |

DZC<sub>2</sub> structure in the gas-phase at B3LYP-D3/6-311++G(2d,2p).

E(SCF) = -1783.45627430 u.a. ; Zero-point correction = 0.271283 u.a. ; G = -1783.236442 u.a.  
at 298,15K.

Charge = 0; Multiplicity = 1

|   | Coordinates (Angstroms) |             |             |
|---|-------------------------|-------------|-------------|
|   | X                       | Y           | Z           |
| P | 4.06902200              | -0.06751900 | 0.07148600  |
| C | 3.11866800              | 1.37681500  | -0.56460200 |
| H | 3.03561700              | 1.37307400  | -1.64776000 |
| H | 3.59286000              | 2.29620400  | -0.22852200 |
| C | 0.79931700              | 2.37876800  | -0.16872700 |
| H | 1.15404300              | 3.26348200  | 0.35696500  |
| H | 0.72337200              | 2.59395100  | -1.23011600 |
| C | -0.56645000             | 1.91874800  | 0.37680600  |
| O | -0.52815200             | 1.04738700  | 1.28228000  |
| O | -1.57342400             | 2.42611700  | -0.15978900 |
| H | -2.84473000             | 1.77802300  | 0.26758300  |
| N | 1.76110600              | 1.25762500  | 0.02924300  |
| H | 1.84480900              | 1.05554200  | 1.02964000  |
| O | 3.84718700              | -0.11005000 | 1.52755900  |
| O | 5.54528500              | 0.27022200  | -0.45175100 |
| H | 5.96577400              | -0.48341800 | -0.88058200 |
| O | 3.67253700              | -1.31675800 | -0.78663000 |
| H | 1.28609600              | 0.40032300  | -0.38517900 |
| P | -4.10776000             | 0.01829500  | -0.28556200 |
| C | -2.57225700             | -0.93114700 | -0.61861300 |
| H | -1.91695500             | -0.39354000 | -1.29408700 |
| H | -2.85329000             | -1.87828600 | -1.07342000 |
| C | -0.74591900             | -2.25696700 | 0.55773000  |
| H | -0.44953700             | -2.51418100 | 1.57138500  |
| H | -1.16497900             | -3.14203500 | 0.08231300  |
| C | 0.50223000              | -1.78253400 | -0.20424800 |
| O | 0.38720500              | -0.76216700 | -0.92984000 |
| O | 1.53203300              | -2.45400300 | 0.00603600  |
| H | 2.82055500              | -1.81503900 | -0.48091500 |
| N | -1.81077900             | -1.20177500 | 0.64547800  |
| H | -2.48115800             | -1.47315700 | 1.36492500  |
| O | -3.67259200             | 1.23741600  | 0.57637100  |
| O | -4.79774300             | -0.91594800 | 0.85190900  |
| H | -5.62006200             | -1.29026100 | 0.51744600  |
| O | -4.91391900             | 0.15812500  | -1.50608600 |
| H | -1.36449900             | -0.28809400 | 0.96788100  |

DZC<sub>3</sub> structure in the gas-phase at B3LYP-D3/6-311++G(2d,2p).

E(SCF) = -1783.45637025 u.a. ; Zero-point correction = 0.272457 u.a. ; G = -1783.236040 u.a.  
at 298,15K.

Charge = 0; Multiplicity = 1

|   | Coordinates (Angstroms) |             |             |
|---|-------------------------|-------------|-------------|
|   | X                       | Y           | Z           |
| P | 3.73642200              | 0.00472200  | 0.24509900  |
| C | 2.59177000              | 1.06052700  | -0.75922200 |
| H | 1.80115000              | 0.47841700  | -1.21847700 |
| H | 3.14401100              | 1.62995400  | -1.50091900 |
| C | 0.81815100              | 2.85660800  | -0.32162800 |
| H | 0.64930200              | 3.68551400  | 0.36193900  |
| H | 1.09477400              | 3.25169800  | -1.29546200 |
| C | -0.46152600             | 2.00529700  | -0.42185300 |
| O | -0.31042800             | 0.79044900  | -0.14583600 |
| O | -1.49489200             | 2.61058100  | -0.75270400 |
| H | -2.77996400             | 1.77091700  | -0.66991000 |
| N | 1.94895400              | 2.02253800  | 0.20707100  |
| H | 2.68659600              | 2.60477800  | 0.60662200  |
| O | 3.97939500              | -1.26675600 | -0.63849700 |
| O | 2.80245000              | -0.37510100 | 1.46973600  |
| H | 2.10402900              | -1.09348400 | 1.29629500  |
| O | 4.90174800              | 0.81584800  | 0.62629300  |
| H | 1.58540500              | 1.43588500  | 0.96878300  |
| P | -3.77611500             | 0.04928600  | 0.35544200  |
| C | -3.01201000             | -1.45280500 | -0.38619700 |
| H | -3.06721700             | -1.40586400 | -1.47024400 |
| H | -3.52333200             | -2.34688600 | -0.03833400 |
| C | -0.70107000             | -2.41257700 | -0.76422600 |
| H | -1.01960800             | -3.44166400 | -0.60619200 |
| H | -0.79698300             | -2.15899100 | -1.81528700 |
| C | 0.75068200              | -2.20877800 | -0.29441300 |
| O | 0.88156700              | -1.98700100 | 0.93433100  |
| O | 1.63166600              | -2.24588900 | -1.17810000 |
| H | 3.11987400              | -1.76257100 | -0.84382900 |
| N | -1.58065000             | -1.49613600 | 0.02268000  |
| H | -1.48943900             | -1.70769700 | 1.01791300  |
| O | -3.22263200             | 0.23610700  | 1.70536300  |
| O | -5.32792800             | -0.33825800 | 0.22168000  |
| H | -5.87115500             | 0.40367400  | -0.06644100 |
| O | -3.63749900             | 1.20941300  | -0.69255000 |
| H | -1.16373200             | -0.52338600 | -0.05531300 |

DZC<sub>4</sub> structure in the gas-phase at B3LYP-D3/6-311++G(2d,2p).

E(SCF) = -1783.45594771 u.a. ; Zero-point correction = 0.272391 u.a. ; G = -1783.235753 u.a.  
at 298,15K.

Charge = 0; Multiplicity = 1

|   | Coordinates (Angstroms) |             |             |
|---|-------------------------|-------------|-------------|
|   | X                       | Y           | Z           |
| P | 3.74557600              | -0.01924900 | 0.26596200  |
| C | 2.61381800              | 1.04058200  | -0.74749300 |
| H | 1.81693600              | 0.46147100  | -1.20044500 |
| H | 3.17203600              | 1.59354100  | -1.49713200 |
| C | 0.85748900              | 2.84960400  | -0.33888100 |
| H | 0.69161000              | 3.69427300  | 0.32623600  |
| H | 1.13159400              | 3.22135200  | -1.32221900 |
| C | -0.42274200             | 1.99661800  | -0.41251400 |
| O | -0.28964100             | 0.81164500  | -0.01796600 |
| O | -1.44037500             | 2.56747400  | -0.83713200 |
| H | -2.72275000             | 1.72850400  | -0.72595300 |
| N | 1.98318400              | 2.02104900  | 0.20671300  |
| H | 2.72530200              | 2.60195200  | 0.59941700  |
| O | 3.99289200              | -1.28877800 | -0.61972600 |
| O | 2.80073300              | -0.40037200 | 1.48165000  |
| H | 2.10010500              | -1.11142400 | 1.29804600  |
| O | 4.90890400              | 0.78859500  | 0.65994200  |
| H | 1.60698300              | 1.44703400  | 0.97264400  |
| P | -3.81358000             | 0.07021900  | 0.33043100  |
| C | -3.02585900             | -1.44160600 | -0.37635200 |
| H | -3.09687100             | -1.42463000 | -1.46051400 |
| H | -3.51667200             | -2.33508300 | 0.00050500  |
| C | -0.70702600             | -2.34741100 | -0.81090300 |
| H | -1.03473100             | -3.38022300 | -0.70330000 |
| H | -0.79513800             | -2.04506400 | -1.84974900 |
| C | 0.74336100              | -2.18079400 | -0.32424700 |
| O | 0.87088400              | -2.00326300 | 0.91164200  |
| O | 1.62861900              | -2.20265400 | -1.20468100 |
| H | 3.12940000              | -1.76748200 | -0.84529900 |
| N | -1.58724100             | -1.46290300 | 0.01156300  |
| H | -1.47413300             | -1.70713000 | 0.99713000  |
| O | -3.36213100             | 0.25645900  | 1.72138100  |
| O | -5.37322400             | -0.26371700 | 0.14425200  |
| H | -5.81962700             | -0.28498300 | 0.99797100  |
| O | -3.59228700             | 1.18691500  | -0.73462900 |
| H | -1.17482100             | -0.48407000 | -0.03665800 |



DZC<sub>5</sub> structure in the gas-phase at B3LYP-D3/6-311++G(2d,2p).

E(SCF) = -1783.45842117 u.a. ; Zero-point correction = 0.275007 u.a. ; G = -1783.233438 u.a.  
at 298,15K.

Charge = 0; Multiplicity = 1

|   | Coordinates (Angstroms) |             |             |
|---|-------------------------|-------------|-------------|
|   | X                       | Y           | Z           |
| P | 3.63189000              | 0.08185300  | -0.07976100 |
| C | 2.29969900              | -0.77133000 | -1.03169000 |
| H | 2.68270100              | -0.92827300 | -2.03690700 |
| H | 1.36540000              | -0.22930000 | -1.09562200 |
| C | 1.15699000              | -2.09912400 | 0.79542800  |
| H | 1.15563000              | -3.09490500 | 1.23540300  |
| H | 1.56836100              | -1.38945600 | 1.50326900  |
| C | -0.26847400             | -1.71716600 | 0.38366600  |
| O | -0.57584100             | -1.89523900 | -0.81468800 |
| O | -0.99591300             | -1.24967400 | 1.29741400  |
| H | -2.67613400             | -1.47442000 | 1.01355200  |
| N | 2.03074400              | -2.12810100 | -0.42978300 |
| H | 1.53565400              | -2.69375900 | -1.12278400 |
| O | 4.77774800              | -0.84268700 | -0.04483700 |
| H | 2.94120400              | -2.54827200 | -0.21866400 |
| O | 3.02967500              | 0.39237700  | 1.34366700  |
| H | 2.21583100              | 0.99807300  | 1.34197300  |
| O | 3.79043100              | 1.43334500  | -0.87204300 |
| P | -3.79720500             | -0.17075600 | -0.30296100 |
| C | -3.26116500             | 1.34924800  | 0.61325500  |
| H | -3.76626700             | 1.34154000  | 1.57580900  |
| H | -3.57914700             | 2.22568600  | 0.05599300  |
| C | -0.99734400             | 2.06677300  | -0.26841700 |
| H | -1.21953500             | 1.52053600  | -1.17860200 |
| H | -1.32935200             | 3.09640400  | -0.38366000 |
| C | 0.50356800              | 2.01354000  | 0.04175800  |
| O | 0.79997000              | 1.64898600  | 1.21127700  |
| O | 1.26567800              | 2.29211500  | -0.90144100 |
| H | 2.92510300              | 1.93595300  | -0.88021500 |
| N | -1.77735700             | 1.44011500  | 0.85321400  |
| H | -1.56634700             | 1.96569400  | 1.70063600  |
| O | -3.62079300             | -1.34654000 | 0.74760300  |
| H | -1.38674600             | 0.49425500  | 1.04493000  |
| O | -2.66096100             | -0.35655500 | -1.39638500 |
| H | -1.96208300             | -1.04428600 | -1.21689600 |
| O | -5.15973500             | 0.03916200  | -0.79124300 |

DZC<sub>6</sub> structure in the gas-phase at B3LYP-D3/6-311++G(2d,2p).

E(SCF) = -1783.45668360 u.a. ; Zero-point correction = 0.274394 u.a. ; G = -1783.233127 u.a.  
at 298,15K.

Charge = 0; Multiplicity = 1

|   | Coordinates (Angstroms) |             |             |
|---|-------------------------|-------------|-------------|
|   | X                       | Y           | Z           |
| P | -3.69221800             | -0.07870300 | -0.15714300 |
| C | -2.43591400             | 0.98306200  | 0.68307200  |
| H | -1.58968500             | 0.41023500  | 1.04869500  |
| H | -2.89546100             | 1.53113500  | 1.50060200  |
| C | -0.82252300             | 2.84284600  | 0.18655900  |
| H | -0.69079800             | 3.67972700  | -0.49765300 |
| H | -1.08226100             | 3.21211000  | 1.17265600  |
| C | 0.47608600              | 2.01753100  | 0.22105200  |
| O | 0.57249700              | 1.13543600  | -0.68950200 |
| O | 1.30094800              | 2.30116500  | 1.09654400  |
| H | 2.47884100              | 1.19017600  | 1.22260100  |
| N | -1.92909500             | 1.97477300  | -0.32567500 |
| H | -2.72455200             | 2.51440800  | -0.67169800 |
| O | -3.88752600             | -1.28325500 | 0.83018700  |
| O | -2.89699400             | -0.57058600 | -1.43766700 |
| H | -2.20735000             | -1.28059300 | -1.25413000 |
| O | -4.85767900             | 0.75571100  | -0.47992800 |
| H | -1.54675800             | 1.43789000  | -1.11652700 |
| P | 3.84469500              | 0.00767600  | -0.07392600 |
| C | 3.05537100              | -1.58455000 | -0.55554200 |
| H | 3.38334400              | -2.37389200 | 0.11424100  |
| H | 3.37875600              | -1.82206800 | -1.56543300 |
| C | 0.87195800              | -2.01421800 | 0.70092200  |
| H | 1.24711100              | -3.01091400 | 0.92444100  |
| H | 1.10195400              | -1.34812600 | 1.52502100  |
| C | -0.63623700             | -2.06521100 | 0.40090900  |
| O | -0.92775000             | -2.13102000 | -0.82385000 |
| O | -1.40839800             | -2.00089100 | 1.37516600  |
| H | -3.01115000             | -1.71810700 | 1.06520500  |
| N | 1.55448100              | -1.50878100 | -0.53360700 |
| H | 1.11583400              | -2.01433600 | -1.30848200 |
| O | 3.06172000              | 0.37423600  | 1.25085700  |
| O | 3.33534000              | 1.02515800  | -1.19801800 |
| H | 2.38419900              | 1.24017400  | -1.12571700 |
| O | 5.29624800              | -0.15529800 | -0.01375400 |
| H | 1.23343300              | -0.52637000 | -0.65491000 |

DZC<sub>7</sub> structure in the gas-phase at B3LYP-D3/6-311++G(2d,2p).

E(SCF) = -1783.45447109 u.a. ; Zero-point correction = 0.273739 u.a. ; G = -1783.231887 u.a.  
at 298,15K.

Charge = 0; Multiplicity = 1

|   | Coordinates (Angstroms) |             |             |
|---|-------------------------|-------------|-------------|
|   | X                       | Y           | Z           |
| P | 3.41171100              | 0.32907700  | 0.10074300  |
| C | 2.27789600              | -0.51638000 | -1.07847400 |
| H | 2.66727800              | -0.36548500 | -2.08213100 |
| H | 1.25276900              | -0.17249200 | -1.03610100 |
| C | 1.53728800              | -2.42870900 | 0.42655300  |
| H | 1.72194100              | -3.49074300 | 0.57629500  |
| H | 1.90825200              | -1.87043200 | 1.27838000  |
| C | 0.03797300              | -2.17696700 | 0.21654500  |
| O | -0.32938200             | -2.02487800 | -0.97935800 |
| O | -0.64936100             | -2.13905800 | 1.25082400  |
| H | -2.01312100             | -1.46841000 | 1.17699000  |
| N | 2.29480700              | -1.99887400 | -0.80397000 |
| H | 1.85464300              | -2.47199900 | -1.59494900 |
| O | 4.64191100              | -0.47960800 | 0.17189400  |
| H | 3.27887700              | -2.27162900 | -0.72057000 |
| O | 2.61910400              | 0.40579300  | 1.46458400  |
| H | 1.72084400              | 0.84874000  | 1.37786100  |
| O | 3.52756300              | 1.77727800  | -0.50334600 |
| P | -3.48605200             | -0.40316700 | -0.17187100 |
| C | -3.58968500             | 1.40061700  | 0.18949000  |
| H | -4.30418400             | 1.52391000  | 0.99913300  |
| H | -3.92712600             | 1.96312900  | -0.67550500 |
| C | -1.32218900             | 2.41009900  | -0.43809300 |
| H | -1.54091500             | 1.83866300  | -1.33488600 |
| H | -1.47520000             | 3.46805600  | -0.62656400 |
| C | 0.12529100              | 2.11452800  | -0.01428000 |
| O | 0.24487600              | 1.39000100  | 1.01121200  |
| O | 1.01195800              | 2.57480900  | -0.75257200 |
| H | 2.62744300              | 2.21382500  | -0.56709000 |
| N | -2.25926100             | 1.94434200  | 0.64301700  |
| H | -2.39530700             | 2.70058200  | 1.30959200  |
| O | -2.86461500             | -0.90407800 | 1.18933500  |
| H | -1.72528600             | 1.22059600  | 1.15878900  |
| O | -2.33322500             | -0.44040500 | -1.25880400 |
| H | -1.61663800             | -1.14917200 | -1.16481400 |
| O | -4.81475700             | -0.89025300 | -0.55517800 |

DZC<sub>8</sub> structure in the gas-phase at B3LYP-D3/6-311++G(2d,2p).

E(SCF) = -1783.45483329 u.a. ; Zero-point correction = 0.273938 u.a. ; G = -1783.231684 u.a.  
at 298,15K.

Charge = 0; Multiplicity = 1

|   | Coordinates (Angstroms) |             |             |
|---|-------------------------|-------------|-------------|
|   | X                       | Y           | Z           |
| P | -3.53518600             | -0.35968000 | -0.23350000 |
| C | -2.51872000             | 0.83408500  | 0.73548600  |
| H | -1.57566800             | 0.39261500  | 1.04338700  |
| H | -3.06597200             | 1.19256200  | 1.60247500  |
| C | -1.21360300             | 2.95536500  | 0.41918100  |
| H | -1.25602900             | 3.88966200  | -0.13782300 |
| H | -1.44067900             | 3.13668100  | 1.46410700  |
| C | 0.17659300              | 2.31066000  | 0.23841800  |
| O | 0.25082700              | 1.53047000  | -0.74938600 |
| O | 1.05493300              | 2.60428600  | 1.06437700  |
| H | 2.18256900              | 1.49574800  | 1.10107600  |
| N | -2.21367700             | 2.00102400  | -0.15810500 |
| H | -3.09132200             | 2.44467900  | -0.43023600 |
| O | -3.57969500             | -1.63758400 | 0.67899700  |
| O | -2.60148400             | -0.63697000 | -1.48399300 |
| H | -1.76933200             | -1.15734000 | -1.27547100 |
| O | -4.80989800             | 0.28086600  | -0.58702000 |
| H | -1.76087600             | 1.61768100  | -1.00435800 |
| P | 3.52730400              | 0.27466000  | -0.19609400 |
| C | 3.52613000              | -1.56846400 | -0.10705200 |
| H | 3.93548600              | -1.91780200 | 0.83633600  |
| H | 4.15294900              | -1.92008700 | -0.92264400 |
| C | 1.24585000              | -2.15147100 | 0.90792300  |
| H | 1.40256400              | -3.06101500 | 1.47960200  |
| H | 1.49916900              | -1.28921800 | 1.51749800  |
| C | -0.21056700             | -2.02576300 | 0.43349600  |
| O | -0.36219300             | -1.81571600 | -0.79722000 |
| O | -1.07524200             | -2.10046500 | 1.32631200  |
| H | -2.65508800             | -1.94155400 | 0.93638700  |
| N | 2.15086000              | -2.14784700 | -0.29416500 |
| H | 2.21336600              | -3.09612500 | -0.65802400 |
| O | 2.75375900              | 0.65979500  | 1.12931800  |
| O | 2.52243900              | 0.51666600  | -1.39780200 |
| H | 1.63495400              | 0.93893200  | -1.15450100 |
| O | 4.90788800              | 0.73234300  | -0.37601600 |
| H | 1.62708500              | -1.61834800 | -1.01327500 |

DZC<sub>9</sub> structure in the gas-phase at B3LYP-D3/6-311++G(2d,2p).

E(SCF) = -1783.45053838 u.a. ; Zero-point correction = 0.271577 u.a. ; G = -1783.231210 u.a.  
at 298,15K.

Charge = 0; Multiplicity = 1

|   | Coordinates (Angstroms) |             |             |
|---|-------------------------|-------------|-------------|
|   | X                       | Y           | Z           |
| P | -3.63583600             | -0.12687100 | 0.68579100  |
| C | -2.22929700             | 1.04310700  | 0.47122500  |
| H | -1.31245200             | 0.70729500  | 0.94236500  |
| H | -2.50621300             | 2.00858000  | 0.88739100  |
| C | -1.00683400             | 2.26243400  | -1.37950000 |
| H | -1.04075800             | 2.36468400  | -2.45990800 |
| H | -1.29145100             | 3.18900700  | -0.88840500 |
| C | 0.39643700              | 1.80148900  | -0.94097400 |
| O | 1.05044200              | 1.14470700  | -1.77759200 |
| O | 0.72017300              | 2.07184200  | 0.24524000  |
| H | 2.11315400              | 1.76453200  | 0.65697600  |
| N | -1.99442900             | 1.19938900  | -0.99905900 |
| H | -2.90997700             | 1.35869100  | -1.42777000 |
| O | -4.50733500             | 0.05509100  | -0.48985400 |
| O | -4.30895000             | 0.33693900  | 2.06915800  |
| H | -4.15046600             | -0.29722100 | 2.77644200  |
| O | -3.04573000             | -1.52817300 | 1.04359700  |
| H | -1.66758400             | 0.25501400  | -1.37644500 |
| P | 3.63602500              | 0.12554000  | 0.68648800  |
| C | 2.22659700              | -1.04049500 | 0.46973800  |
| H | 1.30976000              | -0.70191400 | 0.93892300  |
| H | 2.50016900              | -2.00648500 | 0.88688200  |
| C | 1.00746700              | -2.26014200 | -1.38270500 |
| H | 1.04139300              | -2.36096100 | -2.46326100 |
| H | 1.29292500              | -3.18707300 | -0.89280900 |
| C | -0.39603800             | -1.80083900 | -0.94321600 |
| O | -1.04898100             | -1.13999600 | -1.77755800 |
| O | -0.72077800             | -2.07649300 | 0.24134600  |
| H | -2.11247900             | -1.76577500 | 0.65701200  |
| N | 1.99424100              | -1.19681300 | -1.00096000 |
| H | 2.91059400              | -1.35630400 | -1.42798400 |
| O | 4.51061900              | -0.06122000 | -0.48611000 |
| O | 4.30410400              | -0.33802800 | 2.07245700  |
| H | 4.14294400              | 0.29629800  | 2.77898200  |
| O | 3.04905900              | 1.52943100  | 1.03917600  |
| H | 1.66792500              | -0.25257000 | -1.37871000 |

DZP<sub>9</sub> structure in the gas-phase at B3LYP-D3/6-311++G(2d,2p).

E(SCF) = -1783.44840851 u.a. ; Zero-point correction = 0.271262 u.a. ; G = -1783.228391 u.a.  
at 298,15K.

Charge = 0; Multiplicity = 1

|   | Coordinates (Angstroms) |             |             |
|---|-------------------------|-------------|-------------|
|   | X                       | Y           | Z           |
| P | 3.60976700              | 0.05216700  | 0.53176500  |
| C | 2.01716200              | -0.92419400 | 0.56797100  |
| H | 1.15649400              | -0.34609900 | 0.88624300  |
| H | 2.14058400              | -1.78888700 | 1.21378600  |
| C | 0.87857900              | -2.57420700 | -0.98025300 |
| H | 0.97602000              | -2.96073700 | -1.99273200 |
| H | 1.15415700              | -3.33724400 | -0.26007700 |
| C | -0.55313000             | -2.07150500 | -0.78142200 |
| O | -0.93264600             | -1.13904700 | -1.48003300 |
| O | -1.21793800             | -2.66477100 | 0.14839400  |
| H | -2.17754700             | -2.17834600 | 0.32587100  |
| N | 1.79719900              | -1.40782500 | -0.83717500 |
| H | 2.75529400              | -1.56660600 | -1.19853800 |
| O | 4.30460900              | -0.53487000 | -0.64774700 |
| O | 4.29557000              | -0.40964000 | 1.92438400  |
| H | 4.39948400              | 0.34707000  | 2.51083500  |
| O | 3.31820700              | 1.53274300  | 0.67157600  |
| H | 1.42734300              | -0.60107700 | -1.36976700 |
| P | -3.60976800             | -0.05203800 | 0.53181400  |
| C | -2.01717200             | 0.92422900  | 0.56785800  |
| H | -1.15661500             | 0.34598300  | 0.88613800  |
| H | -2.14036700             | 1.78901800  | 1.21358000  |
| C | -0.87859900             | 2.57398400  | -0.98062100 |
| H | -0.97589300             | 2.96030800  | -1.99319800 |
| H | -1.15431600             | 3.33718200  | -0.26067300 |
| C | 0.55307800              | 2.07129700  | -0.78145600 |
| O | 0.93278700              | 1.13892600  | -1.48009900 |
| O | 1.21777000              | 2.66467800  | 0.14836600  |
| H | 2.17741300              | 2.17832700  | 0.32608300  |
| N | -1.79725800             | 1.40763500  | -0.83738900 |
| H | -2.75530700             | 1.56634400  | -1.19887200 |
| O | -4.30463500             | 0.53496800  | -0.64769400 |
| O | -4.29512300             | 0.40998900  | 1.92459600  |
| H | -4.40107000             | -0.34706800 | 2.51023100  |
| O | -3.31827800             | -1.53262400 | 0.67159200  |
| H | -1.42732600             | 0.60079900  | -1.36978000 |

AC<sub>9</sub> structure in the gas-phase at B3LYP-D3/6-311++G(2d,2p).

E(SCF) = -1783.44871513 u.a. ; Zero-point correction = 0.270276 u.a. ; G = -1783.230895 u.a.  
at 298,15K.

Charge = 0; Multiplicity = 1

|   | Coordinates (Angstroms) |             |             |
|---|-------------------------|-------------|-------------|
|   | X                       | Y           | Z           |
| P | 3.60211000              | 0.04212800  | 0.55427500  |
| C | 2.05941100              | -0.98541400 | 0.53340400  |
| H | 1.19677100              | -0.46481400 | 0.93595800  |
| H | 2.23543800              | -1.89269000 | 1.10497500  |
| C | 0.86682700              | -2.50612900 | -1.09813400 |
| H | 0.93499100              | -2.80331700 | -2.14154200 |
| H | 1.17020800              | -3.32175800 | -0.44918900 |
| C | -0.56349600             | -2.03442000 | -0.81642400 |
| O | -1.04886300             | -1.19663600 | -1.56626800 |
| O | -1.10425500             | -2.54427800 | 0.23554100  |
| H | -2.09931300             | -2.09451800 | 0.44415700  |
| N | 1.79153500              | -1.34936100 | -0.89445000 |
| H | 2.71331700              | -1.49394300 | -1.32535900 |
| O | 4.31470800              | -0.32449600 | -0.68760100 |
| O | 4.34031100              | -0.45362000 | 1.89291600  |
| H | 4.39540500              | 0.24611300  | 2.55266400  |
| O | 3.24602000              | 1.51330900  | 0.89032400  |
| H | 1.40437800              | -0.47281600 | -1.33393500 |
| P | -3.58716600             | -0.06370700 | 0.57833900  |
| C | -2.02593300             | 0.95292700  | 0.53070900  |
| H | -1.14601800             | 0.41299500  | 0.86396000  |
| H | -2.15831700             | 1.84180900  | 1.14094100  |
| C | -0.89759300             | 2.53555000  | -1.08038400 |
| H | -0.96910100             | 2.86007800  | -2.11634200 |
| H | -1.18958900             | 3.33768200  | -0.41073700 |
| C | 0.53102700              | 2.03785300  | -0.80089300 |
| O | 0.89206900              | 1.06205200  | -1.49303000 |
| O | 1.17629300              | 2.61990300  | 0.10365600  |
| H | 2.39233600              | 1.98486600  | 0.47066700  |
| N | -1.82903300             | 1.38268500  | -0.89323400 |
| H | -2.78329700             | 1.54163000  | -1.25263600 |
| O | -4.33809300             | 0.43262000  | -0.60509200 |
| O | -4.25143500             | 0.43726100  | 1.96924600  |
| H | -4.30808300             | -0.29464500 | 2.59226900  |
| O | -3.23953800             | -1.52826000 | 0.79106800  |
| H | -1.46999600             | 0.55869400  | -1.40702200 |

NZP<sub>1</sub> structure in the gas-phase at B3LYP-D3/6-311++G(2d,2p).

E(SCF) = -1783.45183808 u.a. ; Zero-point correction = 0.272254 u.a. ; G = -1783.230144 u.a.  
at 298,15K.

Charge = 0; Multiplicity = 1

|   | Coordinates (Angstroms) |             |             |
|---|-------------------------|-------------|-------------|
|   | X                       | Y           | Z           |
| P | -2.46319100             | 0.55703300  | 0.13674800  |
| C | -3.63539400             | -0.85340900 | 0.13318700  |
| H | -4.50038900             | -0.54280500 | -0.45182000 |
| H | -3.97341200             | -0.98954000 | 1.16063900  |
| C | -2.02480000             | -2.78160400 | 0.26405500  |
| H | -2.03601000             | -2.56204700 | 1.33010000  |
| H | -2.14220600             | -3.86447900 | 0.17085200  |
| C | -0.62650300             | -2.46328000 | -0.26442700 |
| O | -0.43617400             | -1.75181800 | -1.25071300 |
| O | 0.32676600              | -3.03954300 | 0.40642900  |
| H | 1.26259600              | -2.73641200 | 0.07974100  |
| N | -3.13022000             | -2.11114700 | -0.39883100 |
| H | -2.99158600             | -2.06782000 | -1.39831600 |
| O | -1.68329000             | 0.50012300  | -1.24405900 |
| H | -1.23347300             | -0.38315200 | -1.37840800 |
| O | -1.43181000             | 0.07514100  | 1.27739100  |
| H | -0.91792600             | 0.83228400  | 1.61145300  |
| O | -2.98337700             | 1.93665900  | 0.36318800  |
| P | 3.03832100              | -0.77455600 | 0.00226600  |
| C | 1.68509200              | 0.35022800  | -0.57384100 |
| H | 0.74210300              | 0.20259100  | -0.06781500 |
| H | 1.55084100              | 0.27271300  | -1.64803700 |
| C | 1.33473100              | 2.86413800  | -0.72714900 |
| H | 1.87506200              | 3.80325200  | -0.61225700 |
| H | 1.08747700              | 2.71399700  | -1.77316800 |
| C | 0.07411700              | 2.87148500  | 0.13240200  |
| O | 0.10652800              | 2.37825800  | 1.24682700  |
| O | -0.96277000             | 3.39346100  | -0.45929200 |
| H | -1.81753900             | 3.04593200  | -0.03787300 |
| N | 2.19176500              | 1.73955300  | -0.25617600 |
| H | 3.15481100              | 1.76405400  | -0.62010900 |
| O | 2.63042700              | -2.20045800 | -0.22813300 |
| O | 2.95625500              | -0.44915600 | 1.61261400  |
| H | 2.53457200              | -1.17194800 | 2.08864400  |
| O | 4.25737100              | -0.11403900 | -0.53734100 |
| H | 2.26444500              | 1.79300900  | 0.76557900  |



DN<sub>1</sub> structure in the gas-phase at B3LYP-D3/6-311++G(2d,2p).

E(SCF) = -1783.45161029 u.a. ; Zero-point correction = 0.270763 u.a. ; G = -1783.231974 u.a.  
at 298,15K.

Charge = 0; Multiplicity = 1

|   | Coordinates (Angstroms) |             |             |
|---|-------------------------|-------------|-------------|
|   | X                       | Y           | Z           |
| P | 2.42539400              | 1.20031400  | -0.67467200 |
| C | 3.90547200              | 0.23126000  | -0.16614200 |
| H | 4.61783000              | 0.97383700  | 0.19403700  |
| H | 4.32448000              | -0.17223100 | -1.09008000 |
| C | 2.97629100              | -1.98403500 | 0.50902000  |
| H | 3.05147400              | -2.22554700 | -0.55026400 |
| H | 3.34944400              | -2.85871500 | 1.04924700  |
| C | 1.50429700              | -1.85650400 | 0.86716800  |
| O | 1.05033200              | -0.92311000 | 1.50955800  |
| O | 0.77221100              | -2.86930600 | 0.44410100  |
| H | -0.17542800             | -2.66422900 | 0.61442300  |
| N | 3.78811600              | -0.82728600 | 0.82268300  |
| H | 3.56810200              | -0.46120900 | 1.73829400  |
| O | 1.60066400              | 1.52203000  | 0.65128300  |
| H | 1.33446100              | 0.70093000  | 1.13887100  |
| O | 1.45455100              | 0.08513600  | -1.40962100 |
| H | 1.53860000              | 0.17432600  | -2.36787600 |
| O | 2.71241600              | 2.35740500  | -1.52996600 |
| P | -2.27014400             | -1.15994500 | -0.75752500 |
| C | -3.86172100             | -0.30915700 | -0.43565700 |
| H | -4.58039700             | -1.09676400 | -0.21084900 |
| H | -4.17113300             | 0.13463000  | -1.38309100 |
| C | -3.14331700             | 1.91104700  | 0.44294400  |
| H | -3.14990800             | 2.21361700  | -0.60221300 |
| H | -3.60734600             | 2.72591800  | 1.00699700  |
| C | -1.69745500             | 1.84349000  | 0.91124000  |
| O | -1.26101000             | 0.98317800  | 1.65357100  |
| O | -0.96373600             | 2.85418600  | 0.45853800  |
| H | -0.03059300             | 2.69385600  | 0.69617600  |
| N | -3.91497800             | 0.69731700  | 0.61814700  |
| H | -3.75245100             | 0.29007600  | 1.52897600  |
| O | -1.67946500             | -1.56144100 | 0.69829500  |
| H | -1.43773800             | -0.76830900 | 1.22562100  |
| O | -1.37658200             | 0.09236400  | -1.22489800 |
| H | -0.41315500             | -0.04519900 | -1.22848300 |
| O | -2.31042600             | -2.33136100 | -1.64262100 |

**6- Structures and energetics of Glyph dimers in cyclohexane, at SMD-B3LYP-D3/6-311++G(2d,2p) level.**

DZC<sub>1</sub> structure in cyclohexane at SMD-B3LYP-D3/6-311++G(2d,2p).

E(SCF) = -1783.48956489 u.a. ; Zero-point correction = 0.274343 u.a. ; G = -1783.265939 u.a. at 298,15K.

Charge = 0; Multiplicity = 1

|   | Coordinates (Angstroms) |             |             |
|---|-------------------------|-------------|-------------|
|   | X                       | Y           | Z           |
| P | -3.44822000             | 0.09696000  | 0.20584500  |
| C | -2.25045200             | -0.92312700 | -0.74950700 |
| H | -1.31007500             | -0.39646700 | -0.88730600 |
| H | -2.66945800             | -1.19778200 | -1.71352900 |
| C | -0.90072600             | -3.03737200 | -0.59224600 |
| H | -0.97530300             | -4.03565100 | -0.16481700 |
| H | -1.05307200             | -3.08818200 | -1.66501900 |
| C | 0.46867600              | -2.43542100 | -0.23406900 |
| O | 0.47229700              | -1.71657300 | 0.79934700  |
| O | 1.42082100              | -2.71630500 | -0.98568200 |
| H | 2.79617600              | -1.96036000 | -0.75828100 |
| N | -1.96411100             | -2.17702600 | 0.02027700  |
| H | -2.83830900             | -2.68587700 | 0.16097900  |
| O | -3.62906800             | 1.38906900  | -0.66682800 |
| O | -2.62840800             | 0.45287500  | 1.51196500  |
| H | -1.80211200             | 0.99300000  | 1.31109500  |
| O | -4.66153700             | -0.69684900 | 0.46563800  |
| H | -1.60005500             | -1.90157500 | 0.94380400  |
| P | 3.44825200              | -0.09704000 | 0.20582800  |
| C | 2.24976400              | 0.92251200  | -0.74908700 |
| H | 1.30928900              | 0.39564300  | -0.88547400 |
| H | 2.66783800              | 1.19654300  | -1.71367900 |
| C | 0.90080200              | 3.03724900  | -0.59247600 |
| H | 0.97572600              | 4.03571200  | -0.16554800 |
| H | 1.05299100              | 3.08757400  | -1.66530200 |
| C | -0.46866400             | 2.43578900  | -0.23390900 |
| O | -0.47222700             | 1.71662200  | 0.79927100  |
| O | -1.42101200             | 2.71732200  | -0.98502300 |
| H | -2.79615300             | 1.96068900  | -0.75778200 |
| N | 1.96407800              | 2.17688500  | 0.02018000  |
| H | 2.83849800              | 2.68551200  | 0.16032600  |
| O | 3.62927600              | -1.38908500 | -0.66692100 |
| O | 2.62903600              | -0.45338300 | 1.51224500  |
| H | 1.80264800              | -0.99327000 | 1.31130000  |
| O | 4.66137300              | 0.69717700  | 0.46533500  |
| H | 1.60029700              | 1.90193900  | 0.94392800  |

DZC<sub>2</sub> structure in cyclohexane at SMD- B3LYP-D3/6-311++G(2d,2p).

E(SCF) = -1783.48196931 u.a. ; Zero-point correction = 0.271400 u.a. ; G = -1783.261973 u.a.  
at 298,15K.

Charge = 0; Multiplicity = 1

|   | Coordinates (Angstroms) |             |              |
|---|-------------------------|-------------|--------------|
|   | X                       | Y           | Z            |
| P | 4.07455400              | -0.06433300 | 0.05125100   |
| C | 3.11431700              | 1.39014700  | -0.53223500  |
| H | 3.02564600              | 1.41307900  | -1.61484700  |
| H | 3.59108200              | 2.30174200  | -0.17874000  |
| C | 0.79663900              | 2.38142500  | -0.14756000  |
| H | 1.14674300              | 3.26921900  | 0.37565200   |
| H | 0.73220500              | 2.58894900  | -1.21104000  |
| C | -0.56934700             | 1.92743700  | 0.39183800   |
| O | -0.54942400             | 1.06157400  | 1.30028800   |
| O | -1.57498600             | 2.44435100  | -0.14765200  |
| H | -2.81387700             | 1.77886000  | 0.25165400   |
| N | 1.75932100              | 1.26289400  | 0.06495700   |
| H | 1.84262200              | 1.07631500  | 1.06746800   |
| O | 3.90865100              | -0.14799600 | 1.51525900   |
| O | 5.53408400              | 0.28461300  | -0.50969000  |
| H | 5.96820000              | -0.47153500 | -0.92367100  |
| O | 3.64960300              | -1.30402600 | -0.80928000  |
| H | 1.28956100              | 0.40476800  | -0.34261800  |
| P | -4.09745200             | 0.01658200  | -0.301111600 |
| C | -2.58922400             | -0.98533400 | -0.59415100  |
| H | -1.93058100             | -0.48872500 | -1.29802800  |
| H | -2.89694900             | -1.94113400 | -1.01264400  |
| C | -0.74184400             | -2.27628800 | 0.58243400   |
| H | -0.44874000             | -2.52520100 | 1.59900100   |
| H | -1.15203400             | -3.16662900 | 0.10958200   |
| C | 0.49788600              | -1.79165700 | -0.18061000  |
| O | 0.38054400              | -0.77096000 | -0.90342000  |
| O | 1.53642300              | -2.45912600 | 0.01842500   |
| H | 2.80223800              | -1.80250900 | -0.48505200  |
| N | -1.81930500             | -1.23252700 | 0.66686800   |
| H | -2.47501100             | -1.51143500 | 1.39730400   |
| O | -3.65593900             | 1.23907100  | 0.55184900   |
| O | -4.86183400             | -0.86042400 | 0.82802900   |
| H | -5.64898700             | -1.27768400 | 0.45797900   |
| O | -4.85890600             | 0.17532500  | -1.55199300  |
| H | -1.38504600             | -0.31798600 | 0.98038800   |

DZC<sub>3</sub> structure in cyclohexane at SMD- B3LYP-D3/6-311++G(2d,2p).

E(SCF) = -1783.48485805 u.a. ; Zero-point correction = 0.272725 u.a. ; G = -1783.263856 u.a.  
at 298,15K.

Charge = 0; Multiplicity = 1

|   | Coordinates (Angstroms) |             |             |
|---|-------------------------|-------------|-------------|
|   | X                       | Y           | Z           |
| P | 3.75577800              | 0.00026200  | 0.21654000  |
| C | 2.59924200              | 1.09520900  | -0.72317600 |
| H | 1.80432600              | 0.51559000  | -1.17965800 |
| H | 3.13705100              | 1.66229300  | -1.47753400 |
| C | 0.81808600              | 2.86703700  | -0.29803100 |
| H | 0.64114800              | 3.69901500  | 0.37997900  |
| H | 1.08965000              | 3.25668100  | -1.27528900 |
| C | -0.44643100             | 1.99986300  | -0.38464500 |
| O | -0.30709700             | 0.80518100  | -0.02897300 |
| O | -1.47725500             | 2.57378800  | -0.78616500 |
| H | -2.73935300             | 1.73462800  | -0.70651300 |
| N | 1.96319100              | 2.05862300  | 0.24008200  |
| H | 2.68693100              | 2.67329600  | 0.61544600  |
| O | 3.94152300              | -1.25109000 | -0.71396400 |
| O | 2.87566700              | -0.41019300 | 1.46866800  |
| H | 2.14658100              | -1.09790500 | 1.28892700  |
| O | 4.97474100              | 0.74404500  | 0.57469800  |
| H | 1.60892300              | 1.49661800  | 1.02230000  |
| P | -3.80935000             | 0.05283200  | 0.33112000  |
| C | -3.02058400             | -1.47233800 | -0.32249400 |
| H | -3.07651200             | -1.47844100 | -1.40748300 |
| H | -3.52521000             | -2.35363600 | 0.06527100  |
| C | -0.71062700             | -2.39244000 | -0.72687800 |
| H | -1.02364600             | -3.42569600 | -0.58643800 |
| H | -0.82603400             | -2.11798400 | -1.77051400 |
| C | 0.74591200              | -2.19997400 | -0.28235900 |
| O | 0.91332700              | -1.97052600 | 0.94077100  |
| O | 1.61324400              | -2.26579400 | -1.18120100 |
| H | 3.06971300              | -1.74597000 | -0.88732400 |
| N | -1.58780900             | -1.49737800 | 0.08710100  |
| H | -1.49749100             | -1.74119200 | 1.07406700  |
| O | -3.34588800             | 0.29872100  | 1.70777400  |
| O | -5.35393400             | -0.33604800 | 0.12831800  |
| H | -5.88561300             | 0.40007000  | -0.19854200 |
| O | -3.60576300             | 1.17901600  | -0.74307400 |
| H | -1.17667300             | -0.52343500 | 0.02880000  |

DZC<sub>4</sub> structure in cyclohexane at SMD-B3LYP-D3/6-311++G(2d,2p).

E(SCF) = -1783.48460586 u.a. ; Zero-point correction = 0.272615 u.a. ; G = -1783.264147 u.a.  
at 298,15K.

Charge = 0; Multiplicity = 1

|   | Coordinates (Angstroms) |             |             |
|---|-------------------------|-------------|-------------|
|   | X                       | Y           | Z           |
| P | 3.76321300              | -0.01768600 | 0.24151100  |
| C | 2.62167000              | 1.08055800  | -0.71229600 |
| H | 1.82396300              | 0.50271200  | -1.16677300 |
| H | 3.16729400              | 1.63447400  | -1.47086500 |
| C | 0.85072600              | 2.86209200  | -0.31995800 |
| H | 0.67095200              | 3.70654500  | 0.34195300  |
| H | 1.12641800              | 3.23314600  | -1.30315400 |
| C | -0.41302800             | 1.99334000  | -0.39247200 |
| O | -0.28843900             | 0.82356300  | 0.04473400  |
| O | -1.43103700             | 2.53764200  | -0.86034900 |
| H | -2.70046000             | 1.71527200  | -0.72577300 |
| N | 1.98963500              | 2.05944500  | 0.23737700  |
| H | 2.71448400              | 2.67497700  | 0.60854100  |
| O | 3.95380300              | -1.26953500 | -0.68738200 |
| O | 2.86678300              | -0.42442800 | 1.48328900  |
| H | 2.13502000              | -1.10507800 | 1.29285800  |
| O | 4.98138300              | 0.72068600  | 0.61357500  |
| H | 1.62526500              | 1.50870600  | 1.02346500  |
| P | -3.83944900             | 0.06768800  | 0.31709500  |
| C | -3.02212500             | -1.43430700 | -0.36940600 |
| H | -3.07054800             | -1.41564700 | -1.45494200 |
| H | -3.52042700             | -2.32990400 | -0.00733900 |
| C | -0.71170500             | -2.35144600 | -0.77087500 |
| H | -1.03520200             | -3.38444600 | -0.65406200 |
| H | -0.81263700             | -2.05679300 | -1.81052200 |
| C | 0.74117900              | -2.18193400 | -0.30604400 |
| O | 0.89765600              | -1.97278800 | 0.92188600  |
| O | 1.61773200              | -2.24451000 | -1.19651100 |
| H | 3.07919900              | -1.75289600 | -0.87769000 |
| N | -1.59219400             | -1.46519200 | 0.04939500  |
| H | -1.51030000             | -1.72740200 | 1.03242400  |
| O | -3.45046400             | 0.24928900  | 1.72965300  |
| O | -5.39308000             | -0.25044400 | 0.06194900  |
| H | -5.85406600             | -0.40829800 | 0.89475400  |
| O | -3.59240600             | 1.20263700  | -0.72321400 |
| H | -1.17325300             | -0.49189900 | 0.01590700  |

DZC<sub>5</sub> structure in cyclohexane at SMD-B3LYP-D3/6-311++G(2d,2p).

E(SCF) = -1783.48802482 u.a. ; Zero-point correction = 0.275165 u.a. ; G = -1783.263323 u.a.  
at 298,15K.

Charge = 0; Multiplicity = 1

|   | Coordinates (Angstroms) |             |             |
|---|-------------------------|-------------|-------------|
|   | X                       | Y           | Z           |
| P | 3.64377200              | 0.08372700  | -0.07281000 |
| C | 2.35869300              | -0.82942300 | -1.03095300 |
| H | 2.77031700              | -1.00708600 | -2.02155400 |
| H | 1.43366600              | -0.27499400 | -1.14015800 |
| C | 1.14452600              | -2.13189700 | 0.77967800  |
| H | 1.11028900              | -3.13371300 | 1.20395800  |
| H | 1.56564700              | -1.44729800 | 1.50576900  |
| C | -0.26705200             | -1.70864500 | 0.37142600  |
| O | -0.58430800             | -1.85488000 | -0.82980800 |
| O | -0.98946200             | -1.25088200 | 1.29567400  |
| H | -2.63328100             | -1.44850800 | 1.02723100  |
| N | 2.03716600              | -2.17245400 | -0.42942800 |
| H | 1.55103800              | -2.72660600 | -1.13845200 |
| O | 4.86535800              | -0.73744600 | -0.01837500 |
| H | 2.91612400              | -2.64484100 | -0.20413400 |
| O | 3.01996700              | 0.37501600  | 1.34717200  |
| H | 2.19368700              | 0.96631100  | 1.33163900  |
| O | 3.72786500              | 1.44058200  | -0.87062900 |
| P | -3.79247200             | -0.18124000 | -0.29217100 |
| C | -3.27732500             | 1.36079400  | 0.58617900  |
| H | -3.79710300             | 1.38161200  | 1.54065300  |
| H | -3.58905100             | 2.22225200  | 0.00235000  |
| C | -1.01193100             | 2.10136000  | -0.26239000 |
| H | -1.24397600             | 1.57635500  | -1.18287700 |
| H | -1.32766500             | 3.13791500  | -0.35701700 |
| C | 0.48692900              | 2.02054700  | 0.03421300  |
| O | 0.79707800              | 1.63374800  | 1.19209500  |
| O | 1.24653000              | 2.31514400  | -0.90981400 |
| H | 2.83989100              | 1.91515700  | -0.87513300 |
| N | -1.79887300             | 1.46826500  | 0.84925300  |
| H | -1.62636900             | 2.00596600  | 1.69816900  |
| O | -3.58870500             | -1.33987800 | 0.77313100  |
| H | -1.39643500             | 0.53365400  | 1.05567300  |
| O | -2.68222600             | -0.37832000 | -1.40675400 |
| H | -1.94454500             | -1.02778100 | -1.20964700 |
| O | -5.16995200             | -0.01718400 | -0.76887400 |

DZC<sub>6</sub> structure in cyclohexane at SMD-B3LYP-D3/6-311++G(2d,2p).

E(SCF) = -1783.48621382 u.a. ; Zero-point correction = 0.274844 u.a. ; G = -1783.261582 u.a.  
at 298,15K.

Charge = 0; Multiplicity = 1

|   | Coordinates (Angstroms) |             |             |
|---|-------------------------|-------------|-------------|
|   | X                       | Y           | Z           |
| P | -3.71219500             | -0.07851000 | -0.15672600 |
| C | -2.47538500             | 1.02784900  | 0.64993000  |
| H | -1.63993200             | 0.45401400  | 1.04114100  |
| H | -2.94230000             | 1.58060600  | 1.46027600  |
| C | -0.80322800             | 2.83539500  | 0.19345600  |
| H | -0.63935600             | 3.67449800  | -0.48139200 |
| H | -1.06989900             | 3.20300800  | 1.17821100  |
| C | 0.47160900              | 1.98281700  | 0.23319300  |
| O | 0.58361000              | 1.12416100  | -0.69643200 |
| O | 1.28662800              | 2.22772100  | 1.13467500  |
| H | 2.46248900              | 1.17260200  | 1.22553900  |
| N | -1.93427800             | 2.01287300  | -0.34307000 |
| H | -2.69562300             | 2.60688600  | -0.67516100 |
| O | -3.83987300             | -1.27011400 | 0.86143500  |
| O | -2.93461800             | -0.57633100 | -1.44517700 |
| H | -2.21106900             | -1.25298800 | -1.24885500 |
| O | -4.94084000             | 0.66751800  | -0.46809700 |
| H | -1.57602300             | 1.49008500  | -1.15231600 |
| P | 3.84904600              | 0.01875700  | -0.08118000 |
| C | 3.08127100              | -1.58711300 | -0.53349800 |
| H | 3.40617300              | -2.35639800 | 0.16119100  |
| H | 3.42178300              | -1.85014000 | -1.53162300 |
| C | 0.88339900              | -2.03622000 | 0.68394800  |
| H | 1.23394600              | -3.04471900 | 0.89343600  |
| H | 1.13121700              | -1.38759000 | 1.51719800  |
| C | -0.62423900             | -2.04642500 | 0.39851500  |
| O | -0.93852600             | -2.07770800 | -0.82113000 |
| O | -1.38631400             | -2.00011100 | 1.38491700  |
| H | -2.94415100             | -1.68415100 | 1.08229200  |
| N | 1.57908100              | -1.53124600 | -0.54231700 |
| H | 1.18846600              | -2.05291900 | -1.32951200 |
| O | 3.11350400              | 0.40103800  | 1.26234100  |
| O | 3.31162800              | 1.02615300  | -1.20136200 |
| H | 2.35243500              | 1.21629200  | -1.12276300 |
| O | 5.30880200              | -0.11527100 | -0.05131100 |
| H | 1.24289400              | -0.55844400 | -0.68349800 |

DZC<sub>7</sub> structure in cyclohexane at SMD-B3LYP-D3/6-311++G(2d,2p).

E(SCF) = -1783.48541602 u.a. ; Zero-point correction = 0.273486 u.a. ; G = -1783.263789 u.a.  
at 298,15K.

Charge = 0; Multiplicity = 1

|   | Coordinates (Angstroms) |             |             |
|---|-------------------------|-------------|-------------|
|   | X                       | Y           | Z           |
| P | 3.43007100              | 0.35622200  | 0.11946900  |
| C | 2.41124800              | -0.56323600 | -1.10410200 |
| H | 2.88775100              | -0.44998300 | -2.07515200 |
| H | 1.39229300              | -0.19985200 | -1.16743500 |
| C | 1.56248300              | -2.44115300 | 0.40724700  |
| H | 1.69586400              | -3.51235800 | 0.54523700  |
| H | 1.94569800              | -1.91566000 | 1.27433000  |
| C | 0.07886700              | -2.12797000 | 0.19511700  |
| O | -0.28180800             | -1.89530300 | -0.98871800 |
| O | -0.62278400             | -2.14110700 | 1.22377400  |
| H | -1.98254900             | -1.48648900 | 1.14554600  |
| N | 2.36526400              | -2.03741900 | -0.80123100 |
| H | 1.94933100              | -2.50718300 | -1.60746500 |
| O | 4.73082000              | -0.32103900 | 0.26865600  |
| H | 3.32817100              | -2.36626900 | -0.69625200 |
| O | 2.57927800              | 0.38937800  | 1.45065400  |
| H | 1.66869300              | 0.80778700  | 1.33157100  |
| O | 3.45128800              | 1.80597900  | -0.49649900 |
| P | -3.50142900             | -0.42026200 | -0.16234900 |
| C | -3.62064700             | 1.37387600  | 0.21999100  |
| H | -4.32601200             | 1.48291900  | 1.03985000  |
| H | -3.98090200             | 1.93929600  | -0.63442600 |
| C | -1.37163900             | 2.40102900  | -0.42810900 |
| H | -1.61179200             | 1.85011600  | -1.33212500 |
| H | -1.51206400             | 3.46324800  | -0.59900900 |
| C | 0.07634600              | 2.08298000  | -0.03844800 |
| O | 0.21798400              | 1.34374600  | 0.97301100  |
| O | 0.95723700              | 2.55151800  | -0.78360200 |
| H | 2.52147500              | 2.18937100  | -0.57972400 |
| N | -2.29868400             | 1.94026500  | 0.66134800  |
| H | -2.45323300             | 2.70886300  | 1.31149900  |
| O | -2.85757900             | -0.95372400 | 1.17522100  |
| H | -1.76043600             | 1.23502600  | 1.19371100  |
| O | -2.38508300             | -0.46541200 | -1.28291900 |
| H | -1.60244100             | -1.10033000 | -1.15781700 |
| O | -4.83628900             | -0.92040800 | -0.52459200 |



DZC<sub>8</sub> structure in cyclohexane at SMD-B3LYP-D3/6-311++G(2d,2p).

E(SCF) = -1783.48621956 u.a. ; Zero-point correction = 0.274051 u.a. ; G = -1783.262870 u.a.  
at 298,15K.

Charge = 0; Multiplicity = 1

|   | Coordinates (Angstroms) |             |             |
|---|-------------------------|-------------|-------------|
|   | X                       | Y           | Z           |
| P | -3.56643300             | -0.36064100 | -0.24646700 |
| C | -2.62196200             | 0.90293100  | 0.70803900  |
| H | -1.71258200             | 0.45750600  | 1.10377900  |
| H | -3.22047600             | 1.29364000  | 1.52604400  |
| C | -1.19007500             | 2.94173000  | 0.42437500  |
| H | -1.19018600             | 3.88559800  | -0.11776300 |
| H | -1.43117300             | 3.11660900  | 1.46722300  |
| C | 0.17917000              | 2.26311600  | 0.25732900  |
| O | 0.25284500              | 1.46819200  | -0.71814900 |
| O | 1.06713900              | 2.55582200  | 1.07811500  |
| H | 2.20844500              | 1.48973100  | 1.08588500  |
| N | -2.22316500             | 2.04095900  | -0.18313700 |
| H | -3.05169500             | 2.55825100  | -0.47572300 |
| O | -3.54157000             | -1.61146400 | 0.70709500  |
| O | -2.60749200             | -0.63265700 | -1.47979700 |
| H | -1.76688900             | -1.13545700 | -1.24641100 |
| O | -4.89106900             | 0.14828800  | -0.63479200 |
| H | -1.77853900             | 1.63875800  | -1.02240800 |
| P | 3.55513400              | 0.25986300  | -0.21397200 |
| C | 3.52583600              | -1.57856800 | -0.12219900 |
| H | 3.95101000              | -1.93292500 | 0.81263900  |
| H | 4.13175000              | -1.94388900 | -0.94797100 |
| C | 1.24872100              | -2.11449100 | 0.92073800  |
| H | 1.40059000              | -3.01385200 | 1.50911800  |
| H | 1.51380500              | -1.24556300 | 1.51539700  |
| C | -0.20816100             | -1.98118100 | 0.46307100  |
| O | -0.38604100             | -1.79949100 | -0.76788400 |
| O | -1.06473100             | -2.02988100 | 1.37013100  |
| H | -2.59835900             | -1.87214000 | 0.97069800  |
| N | 2.14645800              | -2.15069300 | -0.28351000 |
| H | 2.21299500              | -3.11304800 | -0.61162400 |
| O | 2.83118800              | 0.68695400  | 1.12442100  |
| O | 2.54287200              | 0.54475600  | -1.39934000 |
| H | 1.63954000              | 0.92270900  | -1.13109500 |
| O | 4.94272800              | 0.69729500  | -0.42339700 |
| H | 1.63008800              | -1.64984300 | -1.02403700 |

DZC<sub>9</sub> structure in cyclohexane at SMD-B3LYP-D3/6-311++G(2d,2p).

E(SCF) = -1783.47475011 u.a. ; Zero-point correction = 0.271528 u.a. ; G = -1783.254692 u.a.  
at 298,15K.

Charge = 0; Multiplicity = 1

|   | Coordinates (Angstroms) |             |             |
|---|-------------------------|-------------|-------------|
|   | X                       | Y           | Z           |
| P | 3.60912300              | 0.14249600  | 0.69255400  |
| C | 2.29097800              | -1.11641900 | 0.43457100  |
| H | 1.37113500              | -0.87500900 | 0.95662700  |
| H | 2.65130500              | -2.07971500 | 0.78766900  |
| C | 1.01130500              | -2.27521700 | -1.41237600 |
| H | 1.02879500              | -2.35564600 | -2.49480600 |
| H | 1.30796200              | -3.21085900 | -0.94743400 |
| C | -0.38381700             | -1.82824200 | -0.94117000 |
| O | -1.05913900             | -1.15712200 | -1.74887300 |
| O | -0.69461100             | -2.13575200 | 0.24088500  |
| H | -2.02447000             | -1.74674400 | 0.70510100  |
| N | 2.00915800              | -1.22070000 | -1.03041700 |
| H | 2.90126500              | -1.37830400 | -1.50378700 |
| O | 4.48134200              | 0.11013700  | -0.49741300 |
| O | 4.34264900              | -0.35275700 | 2.03426300  |
| H | 4.11716600              | 0.19230600  | 2.79725300  |
| O | 2.93033900              | 1.47256300  | 1.14858700  |
| H | 1.67273800              | -0.27249400 | -1.37210600 |
| P | -3.60920200             | -0.14213800 | 0.69258300  |
| C | -2.29104300             | 1.11667300  | 0.43407100  |
| H | -1.37121600             | 0.87544300  | 0.95623400  |
| H | -2.65134300             | 2.08012200  | 0.78678000  |
| C | -1.01111600             | 2.27460200  | -1.41323500 |
| H | -1.02843000             | 2.35455600  | -2.49570300 |
| H | -1.30775800             | 3.21047000  | -0.94873500 |
| C | 0.38384500              | 1.82765400  | -0.94158000 |
| O | 1.05948300              | 1.15663300  | -1.74909900 |
| O | 0.69429800              | 2.13544700  | 0.24050300  |
| H | 2.02423100              | 1.74703300  | 0.70503900  |
| N | -2.00908000             | 1.22032500  | -1.03094100 |
| H | -2.90110800             | 1.37774800  | -1.50451200 |
| O | -4.48154700             | -0.11017800 | -0.49730500 |
| O | -4.34258200             | 0.35350200  | 2.03423000  |
| H | -4.11714200             | -0.19143800 | 2.79732100  |
| O | -2.93033400             | -1.47203200 | 1.14897100  |
| H | -1.67258700             | 0.27197000  | -1.37216900 |

DZC<sub>10</sub> structure in cyclohexane at SMD-B3LYP-D3/6-311++G(2d,2p).

E(SCF) = -1783.48543818 u.a. ; Zero-point correction = 0.274345 u.a. ; G = -1783.262119 u.a.  
at 298,15K.

Charge = 0; Multiplicity = 1

|   | Coordinates (Angstroms) |             |             |
|---|-------------------------|-------------|-------------|
|   | X                       | Y           | Z           |
| P | -3.86445100             | -0.00336300 | 0.18280700  |
| C | -3.03864900             | -1.64227200 | 0.03241100  |
| H | -3.26116100             | -2.03283400 | -0.95670700 |
| H | -3.42667200             | -2.32952600 | 0.77796300  |
| C | -0.71658600             | -2.37720000 | -0.72702000 |
| H | -1.03276300             | -3.41465500 | -0.63757600 |
| H | -0.87716000             | -2.03379100 | -1.74393200 |
| C | 0.75312400              | -2.22126400 | -0.30946600 |
| O | 0.93247100              | -1.97423100 | 0.91178700  |
| O | 1.60993700              | -2.32141200 | -1.21034100 |
| H | 3.07866800              | -1.75990400 | -0.91553500 |
| N | -1.54785100             | -1.54113300 | 0.19437000  |
| H | -1.26615200             | -1.78262600 | 1.14763400  |
| O | -3.37730800             | 0.72986500  | -1.12643500 |
| O | -3.13144800             | 0.70218200  | 1.41609200  |
| H | -2.21180000             | 0.98255800  | 1.20874000  |
| O | -5.30934900             | -0.18058800 | 0.35756600  |
| H | -1.22654700             | -0.55815900 | 0.10145500  |
| P | 3.69047000              | 0.01147900  | 0.19361700  |
| C | 2.40554800              | 0.99967500  | -0.68900000 |
| H | 1.57053500              | 0.38159600  | -1.00473200 |
| H | 2.84348600              | 1.49288200  | -1.55250600 |
| C | 0.76015600              | 2.87439700  | -0.33536500 |
| H | 0.63710400              | 3.76454000  | 0.27966300  |
| H | 1.02158900              | 3.17070300  | -1.34597900 |
| C | -0.54744600             | 2.07571200  | -0.31179500 |
| O | -0.57709200             | 1.08463200  | 0.48231000  |
| O | -1.46356600             | 2.48096100  | -1.04024900 |
| H | -2.69421900             | 1.46807800  | -1.05765400 |
| N | 1.87357800              | 2.05294300  | 0.23837800  |
| H | 2.64626700              | 2.64867700  | 0.54139000  |
| O | 3.92203700              | -1.22527800 | -0.74618400 |
| O | 2.92594500              | -0.45671200 | 1.49886500  |
| H | 2.19632600              | -1.13525500 | 1.32437900  |
| O | 4.85956200              | 0.86093800  | 0.47265100  |
| H | 1.50574200              | 1.57615500  | 1.07072200  |

DZC<sub>12</sub> structure in cyclohexane at SMD-B3LYP-D3/6-311++G(2d,2p).

E(SCF) = -1783.48432344 u.a. ; Zero-point correction = 0.274976 u.a. ; G = -1783.259247 u.a.  
at 298,15K.

Charge = 0; Multiplicity = 1

|   | Coordinates (Angstroms) |             |             |
|---|-------------------------|-------------|-------------|
|   | X                       | Y           | Z           |
| P | 3.65471500              | 0.02353800  | 0.16531400  |
| C | 2.31292000              | 0.94208500  | -0.70565900 |
| H | 1.44658700              | 0.31231800  | -0.88183800 |
| H | 2.68489600              | 1.33952300  | -1.64577800 |
| C | 0.76530600              | 2.91073200  | -0.43621800 |
| H | 0.71376600              | 3.85383200  | 0.10533100  |
| H | 0.98606500              | 3.10663900  | -1.48013100 |
| C | -0.56866600             | 2.16955300  | -0.27089600 |
| O | -0.60355400             | 1.30092500  | 0.64531000  |
| O | -1.48905300             | 2.50174500  | -1.03876700 |
| H | -2.69714900             | 1.48157200  | -1.04463900 |
| N | 1.87049800              | 2.08832100  | 0.15399300  |
| H | 2.68424100              | 2.66480800  | 0.37720000  |
| O | 3.86646900              | -1.26127800 | -0.71557400 |
| O | 2.96548100              | -0.38448900 | 1.52968900  |
| H | 2.15349500              | -0.96666900 | 1.37724900  |
| O | 4.82067800              | 0.90664700  | 0.32972500  |
| H | 1.51114500              | 1.69781200  | 1.03405400  |
| P | -3.82057100             | -0.01954100 | 0.20094100  |
| C | -2.99213800             | -1.65579800 | 0.01636000  |
| H | -3.41829300             | -2.18044900 | -0.83487900 |
| H | -3.11805000             | -2.25169800 | 0.91600700  |
| C | -0.69938900             | -2.65654200 | -0.57451000 |
| H | -1.05534700             | -3.50136500 | 0.01110000  |
| H | -0.79720200             | -2.86939500 | -1.63329700 |
| C | 0.74682800              | -2.31937600 | -0.16387700 |
| O | 0.81711300              | -1.64305100 | 0.89959600  |
| O | 1.67571300              | -2.69889900 | -0.89716900 |
| H | 3.07885200              | -1.89077600 | -0.74315400 |
| N | -1.52969600             | -1.45705300 | -0.22239300 |
| H | -1.06544300             | -1.05370800 | 0.60700100  |
| O | -3.33413400             | 0.69891700  | -1.12609900 |
| O | -3.05924500             | 0.67622400  | 1.40667400  |
| H | -2.13678000             | 0.98390500  | 1.17977400  |
| O | -5.26357100             | -0.19615700 | 0.39243700  |
| H | -1.42490900             | -0.75377400 | -0.95678700 |

DZP<sub>9</sub> structure in cyclohexane at SMD-B3LYP-D3/6-311++G(2d,2p).

E(SCF) = -1783.47427923 u.a. ; Zero-point correction = 0.271818 u.a. ; G = -1783.255085 u.a.  
at 298,15K.

Charge = 0; Multiplicity = 1

|   | Coordinates (Angstroms) |             |             |
|---|-------------------------|-------------|-------------|
|   | X                       | Y           | Z           |
| P | 3.63416700              | 0.05955800  | 0.53029000  |
| C | 2.06390300              | -0.94582300 | 0.55571400  |
| H | 1.19704600              | -0.39324000 | 0.90394300  |
| H | 2.21452200              | -1.81999900 | 1.18282800  |
| C | 0.88981500              | -2.57954800 | -0.97629400 |
| H | 0.98138400              | -2.97575400 | -1.98561300 |
| H | 1.16815000              | -3.33672300 | -0.25150600 |
| C | -0.53669400             | -2.07212400 | -0.77787000 |
| O | -0.92572400             | -1.14131500 | -1.47158700 |
| O | -1.20755200             | -2.67345100 | 0.14756000  |
| H | -2.15264900             | -2.19177600 | 0.31758600  |
| N | 1.81902400              | -1.41846400 | -0.84739800 |
| H | 2.75492400              | -1.60763700 | -1.23566100 |
| O | 4.36929300              | -0.49946700 | -0.63943800 |
| O | 4.31736300              | -0.39549100 | 1.93008400  |
| H | 4.37925000              | 0.35502900  | 2.53184700  |
| O | 3.32214000              | 1.53616200  | 0.66784100  |
| H | 1.44947300              | -0.61206100 | -1.37811400 |
| P | -3.63415400             | -0.05959200 | 0.53040700  |
| C | -2.06387300             | 0.94575200  | 0.55579600  |
| H | -1.19699000             | 0.39309600  | 0.90384000  |
| H | -2.21439900             | 1.81983700  | 1.18306200  |
| C | -0.88981600             | 2.57962100  | -0.97604800 |
| H | -0.98127400             | 2.97590900  | -1.98534800 |
| H | -1.16813300             | 3.33676900  | -0.25122500 |
| C | 0.53660500              | 2.07201800  | -0.77749400 |
| O | 0.92571900              | 1.14141900  | -1.47144500 |
| O | 1.20755800              | 2.67346800  | 0.14778600  |
| H | 2.15266800              | 2.19180600  | 0.31777400  |
| N | -1.81911700             | 1.41860400  | -0.84726500 |
| H | -2.75503700             | 1.60790700  | -1.23542400 |
| O | -4.36937800             | 0.49955500  | -0.63920200 |
| O | -4.31721600             | 0.39532800  | 1.93030600  |
| H | -4.37907300             | -0.35525400 | 2.53199400  |
| O | -3.32212400             | -1.53621000 | 0.66778600  |
| H | -1.44966200             | 0.61225700  | -1.37814000 |

AC<sub>9</sub> structure in cyclohexane at SMD-B3LYP-D3/6-311++G(2d,2p).

E(SCF) = -1783.47409896 u.a. ; Zero-point correction = 0.270993 u.a. ; G = -1783.255090 u.a.  
at 298,15K.

Charge = 0; Multiplicity = 1

|   | Coordinates (Angstroms) |             |             |
|---|-------------------------|-------------|-------------|
|   | X                       | Y           | Z           |
| P | -3.62097700             | -0.04734400 | 0.55365500  |
| C | -2.07846800             | 0.99253800  | 0.50772700  |
| H | -1.20405600             | 0.48002000  | 0.89638500  |
| H | -2.24803900             | 1.89881400  | 1.08257000  |
| C | -0.87803600             | 2.53238200  | -1.08852800 |
| H | -0.92235800             | 2.84701500  | -2.12918100 |
| H | -1.18595400             | 3.34227200  | -0.43620700 |
| C | 0.54102300              | 2.03764600  | -0.77453500 |
| O | 0.90735100              | 1.02767700  | -1.41051000 |
| O | 1.19432000              | 2.66839000  | 0.09385200  |
| H | 2.36937300              | 1.99731100  | 0.49131800  |
| N | -1.82363000             | 1.38768800  | -0.91539400 |
| H | -2.74783500             | 1.56699100  | -1.32767300 |
| O | -4.38688400             | 0.40515200  | -0.63968500 |
| O | -4.30629500             | 0.47602100  | 1.93057700  |
| H | -4.33604700             | -0.23600800 | 2.57939700  |
| O | -3.26355200             | -1.50370500 | 0.79430200  |
| H | -1.45034800             | 0.55605800  | -1.40248300 |
| P | 3.61444500              | 0.06458200  | 0.52973600  |
| C | 2.13614200              | -1.05126400 | 0.54159600  |
| H | 1.26594400              | -0.59061600 | 0.99911500  |
| H | 2.38925500              | -1.95742100 | 1.08585100  |
| C | 0.86742500              | -2.56702900 | -1.02990200 |
| H | 0.93049700              | -2.90622900 | -2.06079100 |
| H | 1.16360600              | -3.36102500 | -0.35222300 |
| C | -0.55459100             | -2.06908700 | -0.77043600 |
| O | -1.02212200             | -1.22386900 | -1.52086100 |
| O | -1.13079900             | -2.58214100 | 0.26679300  |
| H | -2.09324300             | -2.11736100 | 0.45147300  |
| N | 1.80998000              | -1.41565800 | -0.87276900 |
| H | 2.69913000              | -1.58716200 | -1.35211300 |
| O | 4.30956900              | -0.20142400 | -0.74781900 |
| O | 4.43271800              | -0.43613200 | 1.82087300  |
| H | 4.47494900              | 0.23806400  | 2.50928400  |
| O | 3.20001500              | 1.50269000  | 0.93999200  |
| H | 1.41313300              | -0.54588400 | -1.30409200 |

NZP<sub>1</sub> structure in cyclohexane at SMD-B3LYP-D3/6-311++G(2d,2p).

E(SCF) = -1783.47493189 u.a. ; Zero-point correction = 0.272603 u.a. ; G = -1783.252879 u.a.  
at 298,15K.

Charge = 0; Multiplicity = 1

|   | Coordinates (Angstroms) |             |             |
|---|-------------------------|-------------|-------------|
|   | X                       | Y           | Z           |
| P | -2.46753700             | 0.61485900  | 0.14268700  |
| C | -3.68782700             | -0.75113700 | 0.14542900  |
| H | -4.54674400             | -0.40708200 | -0.43026000 |
| H | -4.02190600             | -0.88093300 | 1.17528900  |
| C | -2.14408000             | -2.73561500 | 0.24451900  |
| H | -2.16009400             | -2.55438800 | 1.31773600  |
| H | -2.28424100             | -3.81193100 | 0.11105500  |
| C | -0.73716000             | -2.43527800 | -0.26746500 |
| O | -0.52052300             | -1.73510600 | -1.25589400 |
| O | 0.20282000              | -3.02505900 | 0.41452700  |
| H | 1.14102000              | -2.73910600 | 0.09237000  |
| N | -3.23110100             | -2.02121100 | -0.39987400 |
| H | -3.11458800             | -1.98371200 | -1.40259300 |
| O | -1.71305000             | 0.55079900  | -1.25413400 |
| H | -1.28562400             | -0.34138600 | -1.39446200 |
| O | -1.43174800             | 0.09074600  | 1.25656700  |
| H | -0.85246900             | 0.81958700  | 1.54879900  |
| O | -2.93447600             | 2.01292800  | 0.38754600  |
| P | 3.04238700              | -0.85008800 | 0.01270300  |
| C | 1.79378700              | 0.34586300  | -0.64507500 |
| H | 0.81223600              | 0.21501600  | -0.20988000 |
| H | 1.73279600              | 0.27950000  | -1.72711200 |
| C | 1.43244900              | 2.85979100  | -0.71943300 |
| H | 1.97015300              | 3.79558100  | -0.56887100 |
| H | 1.19057200              | 2.74531500  | -1.77131800 |
| C | 0.17563500              | 2.83905500  | 0.13783500  |
| O | 0.19795400              | 2.29894000  | 1.23212600  |
| O | -0.85684700             | 3.40370000  | -0.42265600 |
| H | -1.71469000             | 3.06545300  | -0.00056100 |
| N | 2.29886900              | 1.72386100  | -0.28782100 |
| H | 3.24779400              | 1.79961300  | -0.66693400 |
| O | 2.53910600              | -2.24802900 | -0.21730700 |
| O | 2.92536400              | -0.49344000 | 1.61336600  |
| H | 2.37441500              | -1.13478600 | 2.07593000  |
| O | 4.34457400              | -0.32406000 | -0.47589700 |
| H | 2.39203500              | 1.75572100  | 0.73302600  |

DN<sub>1</sub> structure in cyclohexane at SMD-B3LYP-D3/6-311++G(2d,2p).

E(SCF) = -1783.46921447 u.a. ; Zero-point correction = 0.270550 u.a. ; G = -1783.249786 u.a.  
at 298,15K.

Charge = 0; Multiplicity = 1

|   | Coordinates (Angstroms) |             |             |
|---|-------------------------|-------------|-------------|
|   | X                       | Y           | Z           |
| P | 2.41217200              | -1.19988600 | 0.69127400  |
| C | 3.91149400              | -0.25755600 | 0.19366900  |
| H | 4.62171200              | -1.01170700 | -0.14698900 |
| H | 4.32365300              | 0.15811800  | 1.11576100  |
| C | 3.01428700              | 1.95711300  | -0.53662100 |
| H | 3.10451100              | 2.23737800  | 0.51196200  |
| H | 3.39240700              | 2.80551600  | -1.11472400 |
| C | 1.54059000              | 1.83821200  | -0.88399200 |
| O | 1.07511000              | 0.91466600  | -1.53337500 |
| O | 0.81217200              | 2.85154200  | -0.45298900 |
| H | -0.13493200             | 2.64817900  | -0.62453100 |
| N | 3.80967200              | 0.78127100  | -0.81586200 |
| H | 3.60793400              | 0.40074700  | -1.72998900 |
| O | 1.59349700              | -1.51968600 | -0.63919300 |
| H | 1.35143500              | -0.69676200 | -1.13788300 |
| O | 1.43574800              | -0.07019800 | 1.39080900  |
| H | 1.60019300              | -0.02725700 | 2.34315800  |
| O | 2.66873300              | -2.36338500 | 1.55158400  |
| P | -2.26755600             | 1.15987200  | 0.76452000  |
| C | -3.86613800             | 0.33043200  | 0.42942800  |
| H | -4.57141000             | 1.12921100  | 0.20038800  |
| H | -4.18891900             | -0.10858000 | 1.37508300  |
| C | -3.16745800             | -1.89314900 | -0.46237000 |
| H | -3.18828900             | -2.21160400 | 0.57793900  |
| H | -3.63120900             | -2.69515500 | -1.04463500 |
| C | -1.71907900             | -1.82831100 | -0.92035100 |
| O | -1.27545100             | -0.96684500 | -1.65822400 |
| O | -0.98675800             | -2.84161800 | -0.47261500 |
| H | -0.05314600             | -2.67700200 | -0.70659800 |
| N | -3.92880500             | -0.67150200 | -0.62678800 |
| H | -3.78129200             | -0.26309100 | -1.53991500 |
| O | -1.65684200             | 1.56579600  | -0.68066100 |
| H | -1.43060100             | 0.77085500  | -1.21370200 |
| O | -1.38711200             | -0.09474400 | 1.24301400  |
| H | -0.42118400             | 0.03221600  | 1.25573100  |
| O | -2.30639300             | 2.33201400  | 1.65440100  |



## 7- Structures and energetics of Glyph dimers in aqueous solution, at SMD-B3LYP-D3/6-311++G(2d,2p) level.

DZC<sub>1</sub> structure in aqueous solution at SMD-B3LYP-D3/6-311++G(2d,2p).

E(SCF) = -1783.54799641 u.a. ; Zero-point correction = 0.272516 u.a. ; G = -1783.325128 u.a. at 298,15K.

Charge = 0; Multiplicity = 1

|   | Coordinates (Angstroms) |             |             |
|---|-------------------------|-------------|-------------|
|   | X                       | Y           | Z           |
| P | 3.45915700              | -0.11049900 | 0.26578200  |
| C | 2.40013300              | 0.96844600  | -0.75932200 |
| H | 1.48387800              | 0.42394400  | -0.97956000 |
| H | 2.90505700              | 1.21680700  | -1.68823800 |
| C | 0.90876000              | 2.97476900  | -0.71272100 |
| H | 0.94324600              | 4.00967700  | -0.37918100 |
| H | 1.03825800              | 2.93840900  | -1.78922300 |
| C | -0.42325800             | 2.36528300  | -0.28772600 |
| O | -0.41308200             | 1.64325300  | 0.74236100  |
| O | -1.41917200             | 2.66414700  | -0.99505700 |
| H | -2.73595300             | 1.92895700  | -0.73775300 |
| N | 2.03884400              | 2.24027100  | -0.06144200 |
| H | 2.86209600              | 2.84171200  | -0.00720700 |
| O | 3.61326400              | -1.40876500 | -0.61127800 |
| O | 2.56411500              | -0.45668300 | 1.52418300  |
| H | 1.71201900              | -0.94504100 | 1.25421200  |
| O | 4.75080700              | 0.51610600  | 0.64372700  |
| H | 1.73746700              | 2.02455800  | 0.89514700  |
| P | -3.45916600             | 0.11049900  | 0.26587400  |
| C | -2.40037600             | -0.96857200 | -0.75933300 |
| H | -1.48416700             | -0.42408300 | -0.97979800 |
| H | -2.90547600             | -1.21702800 | -1.68813000 |
| C | -0.90876800             | -2.97470200 | -0.71268100 |
| H | -0.94320400             | -4.00962200 | -0.37917200 |
| H | -1.03829800             | -2.93833900 | -1.78917800 |
| C | 0.42326200              | -2.36513100 | -0.28776200 |
| O | 0.41321800              | -1.64327600 | 0.74244400  |
| O | 1.41919100              | -2.66416700 | -0.99501700 |
| H | 2.73595300              | -1.92909800 | -0.73763600 |
| N | -2.03891100             | -2.24030600 | -0.06139400 |
| H | -2.86210200             | -2.84182100 | -0.00705700 |
| O | -3.61327600             | 1.40870800  | -0.61127700 |
| O | -2.56390900             | 0.45664700  | 1.52412100  |
| H | -1.71178500             | 0.94492000  | 1.25404100  |
| O | -4.75083300             | -0.51594400 | 0.64402700  |
| H | -1.73747300             | -2.02448000 | 0.89515000  |

DZC<sub>5</sub> structure in aqueous solution at SMD-B3LYP-D3/6-311++G(2d,2p).

E(SCF) = -1783.54645155 u.a. ; Zero-point correction = 0.272416 u.a. ; G = -1783.324892 u.a.  
at 298,15K.

Charge = 0; Multiplicity = 1

|   | Coordinates (Angstroms) |             |             |
|---|-------------------------|-------------|-------------|
|   | X                       | Y           | Z           |
| P | 3.67725100              | 0.11409300  | -0.08074700 |
| C | 2.47842700              | -0.87953400 | -1.04401300 |
| H | 2.93145100              | -1.06339400 | -2.01534000 |
| H | 1.57070000              | -0.30518400 | -1.19459600 |
| C | 1.16405500              | -2.19006400 | 0.70595500  |
| H | 1.10352700              | -3.20760500 | 1.08489400  |
| H | 1.58388000              | -1.55502000 | 1.47708000  |
| C | -0.23633000             | -1.72314300 | 0.34118000  |
| O | -0.51904600             | -1.54995100 | -0.87106900 |
| O | -1.01493100             | -1.56827700 | 1.32080500  |
| H | -2.54945300             | -1.46447500 | 0.98537900  |
| N | 2.09601000              | -2.21045000 | -0.46830500 |
| H | 1.64772600              | -2.74461800 | -1.21637000 |
| O | 5.02890600              | -0.49589200 | -0.01707800 |
| H | 2.94026300              | -2.72208700 | -0.20244700 |
| O | 3.05918800              | 0.35739900  | 1.35019000  |
| H | 2.14459900              | 0.81993100  | 1.31558200  |
| O | 3.63778300              | 1.48753800  | -0.86644100 |
| P | -3.78920500             | -0.18175400 | -0.29780500 |
| C | -3.35976000             | 1.39039200  | 0.53841500  |
| H | -3.93338300             | 1.43196700  | 1.46038600  |
| H | -3.64815500             | 2.22624900  | -0.09253500 |
| C | -1.05958000             | 2.10949000  | -0.20675100 |
| H | -1.28009400             | 1.57211100  | -1.12338700 |
| H | -1.32638100             | 3.15424100  | -0.33662500 |
| C | 0.42019400              | 1.96546400  | 0.10779900  |
| O | 0.73182100              | 1.38723400  | 1.18326400  |
| O | 1.20697900              | 2.41379100  | -0.76416500 |
| H | 2.72067000              | 1.92186200  | -0.81380400 |
| N | -1.90720000             | 1.54345900  | 0.89021500  |
| H | -1.83037000             | 2.16052400  | 1.70014500  |
| O | -3.53264300             | -1.32111200 | 0.76811300  |
| H | -1.49615800             | 0.65222700  | 1.19445400  |
| O | -2.74715300             | -0.38737600 | -1.46588500 |
| H | -1.88125700             | -0.86127000 | -1.20803000 |
| O | -5.19864900             | -0.11925800 | -0.75591000 |

DZC<sub>8</sub> structure in aqueous solution at SMD-B3LYP-D3/6-311++G(2d,2p).

E(SCF) = -1783.54483243 u.a. ; Zero-point correction = 0.272011 u.a. ; G = -1783.323529 u.a.  
at 298,15K.

Charge = 0; Multiplicity = 1

|   | Coordinates (Angstroms) |             |             |
|---|-------------------------|-------------|-------------|
|   | X                       | Y           | Z           |
| P | -3.65214300             | -0.24573700 | -0.19722200 |
| C | -2.61800500             | 0.99747900  | 0.65559800  |
| H | -1.73718000             | 0.48317800  | 1.03132900  |
| H | -3.16328300             | 1.42468200  | 1.49192800  |
| C | -1.04125500             | 2.90065200  | 0.35891700  |
| H | -0.96091100             | 3.83391800  | -0.19504900 |
| H | -1.27638000             | 3.11308500  | 1.39570500  |
| C | 0.27305200              | 2.13756700  | 0.22319900  |
| O | 0.36684700              | 1.32760800  | -0.73558400 |
| O | 1.16665300              | 2.40296700  | 1.06724400  |
| H | 2.32546100              | 1.42606900  | 1.08689300  |
| N | -2.16150000             | 2.10660800  | -0.23796400 |
| H | -2.94690500             | 2.72323100  | -0.45202900 |
| O | -3.63604800             | -1.46404700 | 0.80401000  |
| O | -2.81488900             | -0.64506400 | -1.48100100 |
| H | -1.95529900             | -1.13064700 | -1.25115600 |
| O | -5.01449500             | 0.23023800  | -0.54098500 |
| H | -1.81902900             | 1.70859300  | -1.11954400 |
| P | 3.67904000              | 0.16541900  | -0.17263600 |
| C | 3.43592500              | -1.64683500 | -0.11582900 |
| H | 3.78748500              | -2.04473900 | 0.83209900  |
| H | 4.03121100              | -2.07073000 | -0.92022600 |
| C | 1.10612100              | -1.96746400 | 0.84888500  |
| H | 1.32036100              | -2.77646100 | 1.53870600  |
| H | 1.29809800              | -1.01772100 | 1.34237300  |
| C | -0.34931600             | -1.97974000 | 0.40192500  |
| O | -0.58336900             | -1.79725500 | -0.82144700 |
| O | -1.20020100             | -2.12052900 | 1.31864500  |
| H | -2.68558400             | -1.79040800 | 1.00125500  |
| N | 2.02032400              | -2.08761400 | -0.32997300 |
| H | 2.02730500              | -3.06384300 | -0.63067200 |
| O | 3.08271100              | 0.73457000  | 1.16930800  |
| O | 2.76868400              | 0.68065100  | -1.35774900 |
| H | 1.80706600              | 0.91178200  | -1.10134800 |
| O | 5.12633700              | 0.43288900  | -0.37987900 |
| H | 1.59538800              | -1.56434500 | -1.10350500 |

DZC<sub>10</sub> structure in aqueous solution at SMD-B3LYP-D3/6-311++G(2d,2p).

E(SCF) = -1783.54308139 u.a. ; Zero-point correction = 0.272831 u.a. ; G = -1783.320694 u.a.  
at 298,15K.

Charge = 0; Multiplicity = 1

|   | Coordinates (Angstroms) |             |             |
|---|-------------------------|-------------|-------------|
|   | X                       | Y           | Z           |
| P | -3.88282600             | -0.08426800 | 0.13125200  |
| C | -2.89797300             | -1.52981800 | -0.43854800 |
| H | -2.87762600             | -1.52663400 | -1.52450600 |
| H | -3.37187900             | -2.44203400 | -0.08937800 |
| C | -0.57856900             | -2.47265800 | -0.62802500 |
| H | -0.93069300             | -3.48459400 | -0.44034000 |
| H | -0.61919500             | -2.26797900 | -1.69269200 |
| C | 0.84410700              | -2.29392800 | -0.11088900 |
| O | 0.97256600              | -1.75036400 | 1.01947100  |
| O | 1.77068500              | -2.68039500 | -0.86691400 |
| H | 3.09852300              | -1.78792400 | -0.85110100 |
| N | -1.49105000             | -1.51384000 | 0.06612600  |
| H | -1.48784400             | -1.72253800 | 1.06679800  |
| O | -3.69561800             | 1.04430500  | -0.94675600 |
| O | -3.16688600             | 0.40971900  | 1.46718900  |
| H | -2.27886500             | 0.82351200  | 1.29512900  |
| O | -5.29931300             | -0.46529400 | 0.34569600  |
| H | -1.08446000             | -0.56850200 | 0.00162900  |
| P | 3.69833300              | 0.09320000  | 0.09846100  |
| C | 2.34733800              | 1.05351100  | -0.67468100 |
| H | 1.52281600              | 0.38800700  | -0.91633500 |
| H | 2.71419300              | 1.51418200  | -1.58764800 |
| C | 0.67016700              | 2.88181900  | -0.35565400 |
| H | 0.57542900              | 3.81719200  | 0.19265300  |
| H | 0.87887100              | 3.09685400  | -1.39784000 |
| C | -0.62730700             | 2.09930900  | -0.19778000 |
| O | -0.68170300             | 1.22705500  | 0.71022500  |
| O | -1.55890200             | 2.42219300  | -0.97762100 |
| H | -2.81298300             | 1.57625100  | -0.91836900 |
| N | 1.82932900              | 2.13174300  | 0.22268400  |
| H | 2.58142500              | 2.79099100  | 0.43326800  |
| O | 3.87514200              | -1.13870500 | -0.87411500 |
| O | 3.11078100              | -0.42743000 | 1.46834400  |
| H | 2.28224400              | -1.01288900 | 1.33906700  |
| O | 4.94113000              | 0.88474000  | 0.27330600  |
| H | 1.51984700              | 1.71079000  | 1.10516200  |

DZC<sub>11</sub> structure in aqueous solution at SMD-B3LYP-D3/6-311++G(2d,2p).

E(SCF) = -1783.54270978 u.a. ; Zero-point correction = 0.272879 u.a. ; G = -1783.320221 u.a.  
at 298,15K.

Charge = 0; Multiplicity = 1

|   | Coordinates (Angstroms) |             |             |
|---|-------------------------|-------------|-------------|
|   | X                       | Y           | Z           |
| P | 3.48111800              | -0.05102400 | 0.39880900  |
| C | 2.46250500              | 0.93301700  | -0.76053100 |
| H | 1.59748300              | 0.33797000  | -1.04372400 |
| H | 3.03718900              | 1.17301100  | -1.65015500 |
| C | 0.82508600              | 2.81971700  | -0.90131800 |
| H | 0.78378000              | 3.87917400  | -0.65760600 |
| H | 0.99629800              | 2.70304400  | -1.96582000 |
| C | -0.48211900             | 2.16536900  | -0.46578000 |
| O | -0.46995000             | 1.56508600  | 0.64190200  |
| O | -1.46485500             | 2.29043000  | -1.23807900 |
| H | -2.74981700             | 1.46472300  | -0.90195000 |
| N | 1.97269200              | 2.21176900  | -0.15137400 |
| H | 2.74568800              | 2.87557900  | -0.09160300 |
| O | 3.74048700              | -1.40213100 | -0.37790900 |
| O | 2.51825900              | -0.35049800 | 1.61676900  |
| H | 1.67792200              | -0.84396200 | 1.32196200  |
| O | 4.73114300              | 0.63435700  | 0.80936700  |
| H | 1.63391800              | 2.02583200  | 0.79961300  |
| P | -3.59326200             | -0.05904400 | 0.49553000  |
| C | -2.74469700             | -1.58591200 | -0.06452100 |
| H | -3.44794400             | -2.23589800 | -0.57630700 |
| H | -2.33426300             | -2.09682800 | 0.80103400  |
| C | -0.64918800             | -2.39179300 | -1.25662800 |
| H | -1.14781600             | -3.34599900 | -1.10898200 |
| H | -0.31642200             | -2.32028200 | -2.28706600 |
| C | 0.54932000              | -2.25035500 | -0.32387000 |
| O | 0.41075100              | -1.49261100 | 0.67193200  |
| O | 1.58988900              | -2.87575100 | -0.65117700 |
| H | 2.93656200              | -2.01010000 | -0.44271100 |
| N | -1.62564500             | -1.27705300 | -1.00984300 |
| H | -1.08236800             | -0.49525400 | -0.63309900 |
| O | -3.59180100             | 0.90223700  | -0.76081200 |
| O | -2.64587500             | 0.58208800  | 1.58390300  |
| H | -1.78170000             | 0.97774800  | 1.21154400  |
| O | -4.94750900             | -0.37265000 | 1.01286000  |
| H | -2.02543000             | -0.96544700 | -1.89586300 |

DZC<sub>12</sub> structure in aqueous solution at SMD-B3LYP-D3/6-311++G(2d,2p).

E(SCF) = -1783.54401029 u.a. ; Zero-point correction = 0.272845 u.a. ; G = -1783.321449 u.a.  
at 298,15K.

Charge = 0; Multiplicity = 1

|   | Coordinates (Angstroms) |             |             |
|---|-------------------------|-------------|-------------|
|   | X                       | Y           | Z           |
| P | 3.67494400              | 0.06797500  | 0.10028200  |
| C | 2.32647500              | 1.03350800  | -0.66920600 |
| H | 1.48710300              | 0.37396700  | -0.87558300 |
| H | 2.68268100              | 1.46361700  | -1.60100400 |
| C | 0.69698600              | 2.90687000  | -0.38332200 |
| H | 0.62302800              | 3.85358800  | 0.14854600  |
| H | 0.90873600              | 3.09462000  | -1.42951300 |
| C | -0.61387400             | 2.15016600  | -0.19797000 |
| O | -0.72327500             | 1.43299700  | 0.83049400  |
| O | -1.49392800             | 2.33872500  | -1.07692900 |
| H | -2.72213200             | 1.44311500  | -1.05221800 |
| N | 1.84173000              | 2.14403000  | 0.20857100  |
| H | 2.61028900              | 2.78916600  | 0.40218300  |
| O | 3.82892100              | -1.17368600 | -0.86429900 |
| O | 3.09020300              | -0.43638400 | 1.47740400  |
| H | 2.24019500              | -0.98997700 | 1.34378600  |
| O | 4.92802400              | 0.84657100  | 0.25798700  |
| H | 1.52685700              | 1.75184400  | 1.10270700  |
| P | -3.84313100             | -0.06959000 | 0.14935900  |
| C | -2.94205000             | -1.63473300 | -0.14257300 |
| H | -3.26384800             | -2.06524300 | -1.08693200 |
| H | -3.15395300             | -2.32757100 | 0.66690700  |
| C | -0.64053800             | -2.62417200 | -0.50594300 |
| H | -1.02832500             | -3.45832400 | 0.07481600  |
| H | -0.71899200             | -2.83691500 | -1.56528700 |
| C | 0.79836000              | -2.33233700 | -0.07956300 |
| O | 0.91921600              | -1.69098300 | 1.00179000  |
| O | 1.72670900              | -2.73024100 | -0.82316600 |
| H | 3.05254700              | -1.82125500 | -0.82323200 |
| N | -1.46761300             | -1.41476200 | -0.19165600 |
| H | -1.13292400             | -1.05453500 | 0.70881400  |
| O | -3.54628700             | 0.83104000  | -1.10915900 |
| O | -3.13336500             | 0.60479500  | 1.39481700  |
| H | -2.21123500             | 0.97708100  | 1.19821800  |
| O | -5.28372500             | -0.34569000 | 0.37030300  |
| H | -1.24813600             | -0.68679100 | -0.87770700 |

DZC<sub>13</sub> structure in aqueous solution at SMD-B3LYP-D3/6-311++G(2d,2p).

E(SCF) = -1783.53962415 u.a. ; Zero-point correction = 0.271156 u.a. ; G = -1783.319833 u.a.  
at 298,15K.

Charge = 0; Multiplicity = 1

|   | Coordinates (Angstroms) |             |             |
|---|-------------------------|-------------|-------------|
|   | X                       | Y           | Z           |
| P | 3.78102400              | 0.01791300  | 0.22400900  |
| C | 2.58326900              | 1.04950000  | -0.69971600 |
| H | 1.76885600              | 0.41503000  | -1.03867600 |
| H | 3.07278500              | 1.49283600  | -1.56175400 |
| C | 0.81321000              | 2.80411400  | -0.50086200 |
| H | 0.66842400              | 3.77039200  | -0.02279600 |
| H | 1.01717800              | 2.95440700  | -1.55591000 |
| C | -0.43689300             | 1.95511900  | -0.28894500 |
| O | -0.37790700             | 1.03752000  | 0.56045400  |
| O | -1.44244200             | 2.27714600  | -0.98095300 |
| H | -2.73020900             | 1.69216000  | -0.54435300 |
| N | 1.99755900              | 2.14337800  | 0.13489800  |
| H | 2.71524300              | 2.84108000  | 0.33939500  |
| O | 3.97629400              | -1.24175700 | -0.70775600 |
| O | 3.01192300              | -0.43926700 | 1.52792000  |
| H | 2.20854400              | -1.03031900 | 1.32972900  |
| O | 5.04853700              | 0.72354900  | 0.53549200  |
| H | 1.67409000              | 1.74185900  | 1.02184700  |
| P | -3.91730200             | -0.02067500 | 0.32767500  |
| C | -2.90462200             | -1.21875500 | -0.61422000 |
| H | -2.78991600             | -0.87069700 | -1.63714800 |
| H | -3.40963900             | -2.18077600 | -0.61503300 |
| C | -0.61368200             | -2.16706100 | -0.86226900 |
| H | -0.98477300             | -3.18553100 | -0.95408200 |
| H | -0.59303000             | -1.70709300 | -1.84544100 |
| C | 0.78938700              | -2.16003300 | -0.27147100 |
| O | 0.91336800              | -1.81773900 | 0.93377500  |
| O | 1.71957900              | -2.47680000 | -1.05937900 |
| H | 3.12853500              | -1.79065700 | -0.82296800 |
| N | -1.55330000             | -1.38471500 | -0.00710800 |
| H | -1.64019200             | -1.83755800 | 0.90408100  |
| O | -3.68349600             | -0.16847900 | 1.78747200  |
| O | -5.42951200             | -0.37643600 | -0.04482000 |
| H | -5.72248900             | -0.00110500 | -0.88726400 |
| O | -3.69972100             | 1.39450000  | -0.30789700 |
| H | -1.12605000             | -0.44842200 | 0.19101900  |

DZP<sub>1</sub> structure in aqueous solution at SMD-B3LYP-D3/6-311++G(2d,2p).

E(SCF) = -1783.54845414 u.a. ; Zero-point correction = 0.274414 u.a. ; G = -1783.324946 u.a.  
at 298,15K.

Charge = 0; Multiplicity = 1

|   | Coordinates (Angstroms) |             |             |
|---|-------------------------|-------------|-------------|
|   | X                       | Y           | Z           |
| P | -3.53202500             | -0.18200400 | -0.20338000 |
| C | -2.40895100             | 0.89710900  | 0.76573200  |
| H | -1.47386900             | 0.36494500  | 0.91930700  |
| H | -2.84816600             | 1.13858200  | 1.72919300  |
| C | -0.97255900             | 2.94528100  | 0.66311900  |
| H | -1.00979200             | 3.97010200  | 0.29791800  |
| H | -1.08022800             | 2.94552900  | 1.74274400  |
| C | 0.33956400              | 2.32454700  | 0.23337500  |
| O | 0.39783500              | 1.59481500  | -0.74867000 |
| O | 1.33983100              | 2.67132200  | 0.99603300  |
| H | 2.22534700              | 2.19931400  | 0.73971200  |
| N | -2.10311100             | 2.18279300  | 0.05788700  |
| H | -2.94033500             | 2.76770000  | 0.04416400  |
| O | -3.55040400             | -1.50721100 | 0.54238300  |
| O | -2.71871300             | -0.35096100 | -1.59211300 |
| H | -1.88436100             | -0.84521900 | -1.42860900 |
| O | -4.82091000             | 0.51727000  | -0.50465500 |
| H | -1.85811300             | 1.97473100  | -0.91579800 |
| P | 3.53189700              | 0.18212700  | -0.20346900 |
| C | 2.40889900              | -0.89737900 | 0.76532000  |
| H | 1.47374700              | -0.36521200 | 0.91843200  |
| H | 2.84779400              | -1.13865100 | 1.72897800  |
| C | 0.97263200              | -2.94548900 | 0.66299700  |
| H | 1.00955400              | -3.97034100 | 0.29784400  |
| H | 1.08039600              | -2.94582400 | 1.74263300  |
| C | -0.33935400             | -2.32454400 | 0.23336700  |
| O | -0.39774700             | -1.59473500 | -0.74852400 |
| O | -1.33972700             | -2.67139300 | 0.99601700  |
| H | -2.22482000             | -2.19948900 | 0.73944400  |
| N | 2.10344700              | -2.18332900 | 0.05783900  |
| H | 2.94065700              | -2.76831500 | 0.04513400  |
| O | 3.54995800              | 1.50692500  | 0.54310300  |
| O | 2.71852400              | 0.35147500  | -1.59204200 |
| H | 1.88352700              | 0.84468700  | -1.42820100 |
| O | 4.82105500              | -0.51648000 | -0.50496900 |
| H | 1.85922700              | -1.97601500 | -0.91619200 |



DZP<sub>2</sub> structure in aqueous solution at SMD-B3LYP-D3/6-311++G(2d,2p).

E(SCF) = -1783.54605514 u.a. ; Zero-point correction = 0.273888 u.a. ; G = -1783.323189 u.a.  
at 298,15K.

Charge = 0; Multiplicity = 1

|   | Coordinates (Angstroms) |             |             |
|---|-------------------------|-------------|-------------|
|   | X                       | Y           | Z           |
| P | 3.49771100              | -0.11947900 | 0.27496900  |
| C | 2.42814600              | 0.98835100  | -0.72534700 |
| H | 1.51527700              | 0.44716600  | -0.96376000 |
| H | 2.92504700              | 1.28711500  | -1.64321400 |
| C | 0.93106200              | 2.99153700  | -0.59877600 |
| H | 0.94968900              | 4.01235600  | -0.22126600 |
| H | 1.06161300              | 3.00492000  | -1.67570000 |
| C | -0.38224500             | 2.35185600  | -0.20208100 |
| O | -0.45047900             | 1.61192800  | 0.77192600  |
| O | -1.37177200             | 2.69354300  | -0.98021000 |
| H | -2.25350000             | 2.20151500  | -0.74851700 |
| N | 2.05495000              | 2.23260500  | 0.02354000  |
| H | 2.87573300              | 2.83596900  | 0.09473100  |
| O | 3.74805500              | -1.32542700 | -0.76057500 |
| O | 2.62398000              | -0.61212000 | 1.42551900  |
| H | 1.35578900              | -1.23996000 | 1.02043500  |
| O | 4.79951600              | 0.54321500  | 0.59965500  |
| H | 1.77156100              | 1.98273400  | 0.97710500  |
| P | -3.53683200             | 0.15650700  | 0.16524000  |
| C | -2.35705000             | -0.90364000 | -0.75517400 |
| H | -1.42260600             | -0.36120000 | -0.87151500 |
| H | -2.75440900             | -1.15310700 | -1.73475600 |
| C | -0.94588100             | -2.97525000 | -0.61619800 |
| H | -0.99845500             | -3.98698500 | -0.21745100 |
| H | -1.06796100             | -3.01169100 | -1.69342300 |
| C | 0.41150000              | -2.40442300 | -0.26587500 |
| O | 0.41529100              | -1.63537200 | 0.78712300  |
| O | 1.38783400              | -2.70994800 | -0.94057200 |
| H | 2.94783000              | -1.89840800 | -0.82860200 |
| N | -2.07082600             | -2.18382200 | -0.02976700 |
| H | -2.91480700             | -2.76029400 | -0.02581300 |
| O | -3.56337100             | 1.47676500  | -0.58874500 |
| O | -2.77373400             | 0.35181400  | 1.57916700  |
| H | -1.94088800             | 0.85476600  | 1.43641200  |
| O | -4.81731100             | -0.57319700 | 0.42783600  |
| H | -1.84923700             | -1.97199200 | 0.94751200  |

DZP<sub>3</sub> structure in aqueous solution at SMD-B3LYP-D3/6-311++G(2d,2p).

E(SCF) = -1783.54605521 u.a. ; Zero-point correction = 0.273898 u.a. ; G = -1783.323173 u.a.  
at 298,15K.

Charge = 0; Multiplicity = 1

|   | Coordinates (Angstroms) |             |             |
|---|-------------------------|-------------|-------------|
|   | X                       | Y           | Z           |
| P | 3.49851600              | -0.11948200 | 0.27505700  |
| C | 2.42878000              | 0.98817300  | -0.72527200 |
| H | 1.51629400              | 0.44660600  | -0.96434100 |
| H | 2.92606600              | 1.28741000  | -1.64278900 |
| C | 0.93081800              | 2.99068900  | -0.59884800 |
| H | 0.94932600              | 4.01161000  | -0.22162400 |
| H | 1.06132600              | 3.00374800  | -1.67577700 |
| C | -0.38242300             | 2.35095500  | -0.20202900 |
| O | -0.45077700             | 1.61146600  | 0.77226500  |
| O | -1.37185100             | 2.69230600  | -0.98048700 |
| H | -2.25380200             | 2.20085900  | -0.74841000 |
| N | 2.05478000              | 2.23209200  | 0.02373200  |
| H | 2.87533700              | 2.83570500  | 0.09539400  |
| O | 3.74870100              | -1.32545900 | -0.76060700 |
| O | 2.62471400              | -0.61227800 | 1.42543100  |
| H | 1.35610800              | -1.23898000 | 1.02034700  |
| O | 4.80036500              | 0.54312200  | 0.59965100  |
| H | 1.77113900              | 1.98192800  | 0.97715000  |
| P | -3.53746800             | 0.15636400  | 0.16518900  |
| C | -2.35783900             | -0.90386000 | -0.75533800 |
| H | -1.42360200             | -0.36119800 | -0.87261100 |
| H | -2.75576000             | -1.15387900 | -1.73455100 |
| C | -0.94557900             | -2.97473100 | -0.61574400 |
| H | -0.99761000             | -3.98625100 | -0.21640400 |
| H | -1.06780400             | -3.01180700 | -1.69292900 |
| C | 0.41155100              | -2.40296100 | -0.26608900 |
| O | 0.41542700              | -1.63410600 | 0.78708500  |
| O | 1.38766700              | -2.70792900 | -0.94132400 |
| H | 2.94816600              | -1.89804000 | -0.82866100 |
| N | -2.07075700             | -2.18354200 | -0.02944100 |
| H | -2.91442100             | -2.76046100 | -0.02490400 |
| O | -3.56385900             | 1.47679600  | -0.58850700 |
| O | -2.77417300             | 0.35108400  | 1.57909300  |
| H | -1.94143100             | 0.85418700  | 1.43652500  |
| O | -4.81821900             | -0.57288200 | 0.42766300  |
| H | -1.84903600             | -1.97106700 | 0.94769600  |

DZP<sub>4</sub> structure in aqueous solution at SMD-B3LYP-D3/6-311++G(2d,2p).

E(SCF) = -1783.54366255 u.a. ; Zero-point correction = 0.273835 u.a. ; G = -1783.322054 u.a.  
at 298,15K.

Charge = 0; Multiplicity = 1

|   | Coordinates (Angstroms) |             |             |
|---|-------------------------|-------------|-------------|
|   | X                       | Y           | Z           |
| P | 3.50598500              | -0.09331500 | 0.20404600  |
| C | 2.35172000              | 1.00747600  | -0.70560200 |
| H | 1.43100400              | 0.45996300  | -0.89419400 |
| H | 2.78415200              | 1.33004400  | -1.64775400 |
| C | 0.90322000              | 3.04547000  | -0.48715600 |
| H | 0.93656700              | 4.03624000  | -0.03697200 |
| H | 1.05478000              | 3.13677400  | -1.55720500 |
| C | -0.45848400             | 2.45061500  | -0.19911200 |
| O | -0.48780700             | 1.65843200  | 0.83670000  |
| O | -1.41654900             | 2.76147000  | -0.89696700 |
| H | -2.94348200             | 1.87797000  | -0.88577700 |
| N | 2.01723800              | 2.23277500  | 0.09102900  |
| H | 2.85263500              | 2.81771900  | 0.15876900  |
| O | 3.72423900              | -1.27407100 | -0.86668300 |
| O | 2.71452000              | -0.62672600 | 1.39499400  |
| H | 1.43350900              | -1.26069100 | 1.03890700  |
| O | 4.80697400              | 0.59994600  | 0.46162200  |
| H | 1.76318000              | 1.96176100  | 1.04583100  |
| P | -3.50567800             | 0.09314000  | 0.20381700  |
| C | -2.35162700             | -1.00801200 | -0.70569900 |
| H | -1.43076100             | -0.46084600 | -0.89450800 |
| H | -2.78418900             | -1.33075000 | -1.64773500 |
| C | -0.90330300             | -3.04601800 | -0.48635800 |
| H | -0.93573000             | -4.03610100 | -0.03458600 |
| H | -1.05542300             | -3.13905100 | -1.55618300 |
| C | 0.45811200              | -2.44990400 | -0.19961000 |
| O | 0.48728500              | -1.65791300 | 0.83641500  |
| O | 1.41605500              | -2.75986700 | -0.89801800 |
| H | 2.94413600              | -1.87764000 | -0.88624800 |
| N | -2.01753400             | -2.23323500 | 0.09124000  |
| H | -2.85296900             | -2.81818100 | 0.15852100  |
| O | -3.72339500             | 1.27410400  | -0.86672000 |
| O | -2.71446200             | 0.62601700  | 1.39517200  |
| H | -1.43372200             | 1.26085500  | 1.03958200  |
| O | -4.80686500             | -0.59986600 | 0.46108000  |
| H | -1.76401500             | -1.96219800 | 1.04617200  |

DZP<sub>5</sub> structure in aqueous solution at SMD-B3LYP-D3/6-311++G(2d,2p).

E(SCF) = -1783.54542468 u.a. ; Zero-point correction = 0.274471 u.a. ; G = -1783.321482 u.a.  
at 298,15K.

Charge = 0; Multiplicity = 1

|   | Coordinates (Angstroms) |             |             |
|---|-------------------------|-------------|-------------|
|   | X                       | Y           | Z           |
| P | 3.68450100              | 0.18897500  | 0.07087700  |
| C | 2.63075100              | -0.77711600 | -1.08870700 |
| H | 3.18888300              | -0.90833700 | -2.01177400 |
| H | 1.72538100              | -0.22161200 | -1.30682300 |
| C | 1.31367600              | -2.22807600 | 0.54989400  |
| H | 1.26950300              | -3.26808900 | 0.86615000  |
| H | 1.71816300              | -1.63245700 | 1.36146800  |
| C | -0.08542800             | -1.77234800 | 0.21218100  |
| O | -0.43107500             | -1.48445000 | -0.92760300 |
| O | -0.84939500             | -1.76030400 | 1.27068200  |
| H | -1.82912200             | -1.50618500 | 1.06323200  |
| N | 2.23248000              | -2.14922700 | -0.62397400 |
| H | 1.78804000              | -2.62333900 | -1.41456300 |
| O | 5.03987400              | -0.43342100 | 0.19410400  |
| H | 3.07677700              | -2.68037900 | -0.39902000 |
| O | 2.89999200              | 0.45346100  | 1.35176600  |
| H | 1.54664000              | 0.97526900  | 1.19725300  |
| O | 3.79670600              | 1.56439500  | -0.76618600 |
| P | -3.82741200             | -0.27226100 | -0.16419600 |
| C | -3.50173200             | 1.45748900  | 0.36514900  |
| H | -4.13097700             | 1.64993900  | 1.22988600  |
| H | -3.75073800             | 2.16715500  | -0.41750500 |
| C | -1.16501600             | 2.06716600  | -0.33830300 |
| H | -1.37060400             | 1.41202100  | -1.18161500 |
| H | -1.37750700             | 3.09058700  | -0.62888700 |
| C | 0.29773600              | 1.91543300  | 0.00348500  |
| O | 0.53792200              | 1.23915200  | 1.09326200  |
| O | 1.14037400              | 2.37484400  | -0.75827400 |
| H | 2.92477200              | 2.01876900  | -0.76173800 |
| N | -2.07623100             | 1.69201200  | 0.78588500  |
| H | -2.05083100             | 2.43680900  | 1.48441100  |
| O | -3.28263400             | -1.17070700 | 0.93839400  |
| H | -1.71347600             | 0.85517500  | 1.25195600  |
| O | -2.93336800             | -0.48941100 | -1.49003100 |
| H | -2.04468100             | -0.86505500 | -1.28663600 |
| O | -5.27592500             | -0.34678000 | -0.53131200 |

DZP<sub>6</sub> structure in aqueous solution at SMD-B3LYP-D3/6-311++G(2d,2p).

E(SCF) = -1783.54674527 u.a. ; Zero-point correction = 0.275854 u.a. ; G = -1783.320942 u.a.  
at 298,15K.

Charge = 0; Multiplicity = 1

|   | Coordinates (Angstroms) |             |             |
|---|-------------------------|-------------|-------------|
|   | X                       | Y           | Z           |
| P | 3.69266300              | 0.25023700  | -0.02262400 |
| C | 2.58170600              | -0.74869500 | -1.09741200 |
| H | 3.07599900              | -0.84023000 | -2.06158200 |
| H | 1.64597500              | -0.22470500 | -1.24853900 |
| C | 1.33969200              | -2.27219200 | 0.52930000  |
| H | 1.29587000              | -3.32396700 | 0.80541500  |
| H | 1.74554200              | -1.70969300 | 1.36163900  |
| C | -0.06135700             | -1.80625800 | 0.21005000  |
| O | -0.43261400             | -1.55941700 | -0.93153100 |
| O | -0.79868100             | -1.73811600 | 1.28526500  |
| H | -1.78292700             | -1.48774300 | 1.08842600  |
| N | 2.25885000              | -2.14536100 | -0.64140600 |
| H | 1.84054500              | -2.63876100 | -1.43391800 |
| O | 5.04425500              | -0.38801700 | 0.06801400  |
| H | 3.12766200              | -2.63438600 | -0.41376200 |
| O | 3.03119900              | 0.20429500  | 1.45195000  |
| H | 2.18483200              | 0.70228300  | 1.46398300  |
| O | 3.54344300              | 1.65749800  | -0.58181100 |
| P | -3.80748800             | -0.29882500 | -0.14053700 |
| C | -3.50593800             | 1.44860300  | 0.34009800  |
| H | -4.13713100             | 1.65652800  | 1.19975400  |
| H | -3.76523600             | 2.13261700  | -0.46188700 |
| C | -1.17530100             | 2.06863200  | -0.37412200 |
| H | -1.34981700             | 1.38061800  | -1.19779600 |
| H | -1.39966000             | 3.07761300  | -0.70650200 |
| C | 0.26471700              | 1.94458600  | 0.05295500  |
| O | 0.58071500              | 1.44928100  | 1.12696300  |
| O | 1.08917800              | 2.37821500  | -0.86683700 |
| H | 2.06907100              | 2.13834100  | -0.67482200 |
| N | -2.08512400             | 1.71508000  | 0.75309100  |
| H | -2.06956900             | 2.47823200  | 1.43187300  |
| O | -3.23553300             | -1.15931400 | 0.97847700  |
| H | -1.70412000             | 0.89854200  | 1.24287700  |
| O | -2.92493200             | -0.53496700 | -1.47029500 |
| H | -2.03626300             | -0.91215400 | -1.26980200 |
| O | -5.25897900             | -0.40450800 | -0.48831400 |

DZP<sub>7</sub> structure in aqueous solution at SMD-B3LYP-D3/6-311++G(2d,2p).

E(SCF) = -1783.54424986 u.a. ; Zero-point correction = 0.274246 u.a. ; G = -1783.319735 u.a.  
at 298,15K.

Charge = 0; Multiplicity = 1

|   | Coordinates (Angstroms) |             |             |
|---|-------------------------|-------------|-------------|
|   | X                       | Y           | Z           |
| P | 3.71137500              | 0.14137900  | -0.00833100 |
| C | 2.57851300              | -0.86106600 | -1.05831900 |
| H | 3.09146900              | -1.07329800 | -1.99256500 |
| H | 1.68641900              | -0.28591200 | -1.27824100 |
| C | 1.22376100              | -2.15661900 | 0.68702200  |
| H | 1.15121400              | -3.17197100 | 1.07036600  |
| H | 1.65348800              | -1.52256100 | 1.45536600  |
| C | -0.17323700             | -1.67465100 | 0.37915000  |
| O | -0.43068300             | -1.44278000 | -0.87727500 |
| O | -0.96898700             | -1.54587900 | 1.30432400  |
| H | -2.73938200             | -1.51812600 | 0.99844400  |
| N | 2.15154800              | -2.18557400 | -0.48793600 |
| H | 1.71276300              | -2.72211900 | -1.23998400 |
| O | 5.06901900              | -0.48494800 | 0.05366200  |
| H | 2.98489600              | -2.70774400 | -0.20696300 |
| O | 3.00845400              | 0.46189300  | 1.30640900  |
| H | 1.64617800              | 0.99406200  | 1.20961800  |
| O | 3.77551900              | 1.47838500  | -0.91113900 |
| P | -3.80316000             | -0.20110600 | -0.36324100 |
| C | -3.43504300             | 1.36451400  | 0.53274900  |
| H | -4.01353300             | 1.38560700  | 1.45152000  |
| H | -3.71100000             | 2.21911200  | -0.07820800 |
| C | -1.13716700             | 2.08594800  | -0.18387600 |
| H | -1.37584300             | 1.57108400  | -1.11002300 |
| H | -1.38452400             | 3.13818700  | -0.28930000 |
| C | 0.34104000              | 1.92441300  | 0.07166600  |
| O | 0.63693900              | 1.26018000  | 1.15571500  |
| O | 1.14500900              | 2.37588400  | -0.73532200 |
| H | 2.91389600              | 1.94957900  | -0.86206200 |
| N | -1.98228200             | 1.50654600  | 0.90381100  |
| H | -1.90396300             | 2.10438400  | 1.72810700  |
| O | -3.68082400             | -1.32522600 | 0.79238500  |
| H | -1.59332400             | 0.59967100  | 1.18362200  |
| O | -2.69565400             | -0.43454300 | -1.38246500 |
| H | -1.38166300             | -1.05538700 | -1.02848100 |
| O | -5.22533800             | -0.13680200 | -0.82118100 |

DZP<sub>8</sub> structure in aqueous solution at SMD-B3LYP-D3/6-311++G(2d,2p).

E(SCF) = -1783.54522886 u.a. ; Zero-point correction = 0.275609 u.a. ; G = -1783.319358 u.a.  
at 298,15K.

Charge = 0; Multiplicity = 1

|   | Coordinates (Angstroms) |             |             |
|---|-------------------------|-------------|-------------|
|   | X                       | Y           | Z           |
| P | 3.69813500              | 0.21965700  | -0.03391200 |
| C | 2.57467000              | -0.77687400 | -1.09899800 |
| H | 3.07644700              | -0.89964900 | -2.05597200 |
| H | 1.65480900              | -0.23244800 | -1.27163300 |
| C | 1.29624000              | -2.25281100 | 0.55931500  |
| H | 1.20819000              | -3.30716300 | 0.81513500  |
| H | 1.74541700              | -1.72756300 | 1.39302900  |
| C | -0.09928700             | -1.72190100 | 0.32806800  |
| O | -0.41802400             | -1.49353700 | -0.91475100 |
| O | -0.84065200             | -1.57917400 | 1.29449100  |
| H | -2.54784200             | -1.39185000 | 1.13216400  |
| N | 2.21202200              | -2.15652200 | -0.62181300 |
| H | 1.78390300              | -2.65170600 | -1.40753400 |
| O | 5.04587400              | -0.42744200 | 0.05158900  |
| H | 3.06913500              | -2.66432600 | -0.38943700 |
| O | 3.04592100              | 0.18568200  | 1.44485200  |
| H | 2.20566100              | 0.69385600  | 1.46141000  |
| O | 3.55590300              | 1.62513500  | -0.59947100 |
| P | -3.78081100             | -0.27249400 | -0.27443600 |
| C | -3.48397800             | 1.42354200  | 0.37493000  |
| H | -4.10013400             | 1.56233200  | 1.25835700  |
| H | -3.75970200             | 2.16511400  | -0.36890600 |
| C | -1.16069600             | 2.05283600  | -0.35464300 |
| H | -1.34108000             | 1.37110900  | -1.18186500 |
| H | -1.39634500             | 3.06486400  | -0.67008900 |
| C | 0.28353400              | 1.93638600  | 0.05839900  |
| O | 0.61191600              | 1.46075300  | 1.13750500  |
| O | 1.09937200              | 2.35556400  | -0.87647100 |
| H | 2.07962000              | 2.11721600  | -0.68822900 |
| N | -2.05574800             | 1.67619600  | 0.77679400  |
| H | -2.03349100             | 2.42568000  | 1.47073000  |
| O | -3.51010600             | -1.20387600 | 1.01382200  |
| H | -1.66276900             | 0.85298000  | 1.24548400  |
| O | -2.72614000             | -0.57770100 | -1.33020400 |
| H | -1.38504400             | -1.12501000 | -1.02488900 |
| O | -5.22824400             | -0.35361400 | -0.64384100 |

DZP<sub>10</sub> structure in aqueous solution at SMD-B3LYP-D3/6-311++G(2d,2p).

E(SCF) = -1783.54269027 u.a. Zero-point correction = 0.273693 u.a. ; G = -1783.320983 u.a.  
at 298,15K.

Charge = 0; Multiplicity = 1

|   | Coordinates (Angstroms) |             |             |
|---|-------------------------|-------------|-------------|
|   | X                       | Y           | Z           |
| P | 3.59806700              | -0.21973800 | 0.19524500  |
| C | 2.49744500              | 0.88618500  | -0.77031900 |
| H | 1.55496700              | 0.36932400  | -0.93208400 |
| H | 2.94421800              | 1.12759700  | -1.73033300 |
| C | 1.07999100              | 2.94779000  | -0.64731200 |
| H | 1.13778900              | 3.97384900  | -0.28868800 |
| H | 1.17056700              | 2.94104700  | -1.72863800 |
| C | -0.23087800             | 2.34363800  | -0.18840700 |
| O | -0.29203100             | 1.59969200  | 0.77451400  |
| O | -1.24989400             | 2.72736700  | -0.92369900 |
| H | -2.11839400             | 2.29325700  | -0.59995600 |
| N | 2.20805500              | 2.17140000  | -0.05440000 |
| H | 3.05080800              | 2.74797800  | -0.04020500 |
| O | 3.58915200              | -1.54118300 | -0.55727400 |
| O | 2.78013200              | -0.38012900 | 1.58219700  |
| H | 1.93946200              | -0.86547100 | 1.42077100  |
| O | 4.90049500              | 0.45219700  | 0.50102700  |
| H | 1.96283100              | 1.95914500  | 0.91857100  |
| P | -3.52962600             | 0.22885500  | 0.30267900  |
| C | -2.28812300             | -0.73844500 | -0.63950200 |
| H | -1.33747500             | -0.22026600 | -0.57639500 |
| H | -2.57987400             | -0.84126700 | -1.68042200 |
| C | -0.97373500             | -2.86994600 | -0.67669200 |
| H | -1.03617500             | -3.90596800 | -0.34783800 |
| H | -1.07107500             | -2.83128500 | -1.75671800 |
| C | 0.35072000              | -2.29725100 | -0.22276800 |
| O | 0.43519000              | -1.61478400 | 0.78991800  |
| O | 1.33772800              | -2.63588400 | -1.00864900 |
| H | 2.23567800              | -2.19696000 | -0.74583900 |
| N | -2.10177100             | -2.11045400 | -0.06459500 |
| H | -2.96320700             | -2.64575700 | -0.18915200 |
| O | -3.33910200             | -0.04379800 | 1.76393300  |
| O | -4.95001800             | -0.44425500 | -0.10996600 |
| H | -5.24118900             | -0.17025000 | -0.99002900 |
| O | -3.47299100             | 1.64213500  | -0.24231700 |
| H | -1.94133400             | -2.02105300 | 0.94359400  |



DZP<sub>11</sub> structure in aqueous solution at SMD-B3LYP-D3/6-311++G(2d,2p).

E(SCF) = -1783.54241171 u.a. ; Zero-point correction = 0.273587 u.a ; G = -1783.321038 u.a.  
at 298,15K.

Charge = 0; Multiplicity = 1

|   | Coordinates (Angstroms) |             |             |
|---|-------------------------|-------------|-------------|
|   | X                       | Y           | Z           |
| P | -3.59288400             | 0.22497700  | 0.21076600  |
| C | -2.50382000             | -0.88275000 | -0.76613400 |
| H | -1.56200100             | -0.36703700 | -0.93497900 |
| H | -2.95937200             | -1.12107300 | -1.72277600 |
| C | -1.08528600             | -2.94501500 | -0.65732400 |
| H | -1.14277400             | -3.97254700 | -0.30292700 |
| H | -1.18038200             | -2.93326500 | -1.73824700 |
| C | 0.22812300              | -2.34415600 | -0.20122500 |
| O | 0.29319200              | -1.60227400 | 0.76296800  |
| O | 1.24457600              | -2.72797300 | -0.94029500 |
| H | 2.11464000              | -2.29591000 | -0.61908100 |
| N | -2.21004600             | -2.17010900 | -0.05594600 |
| H | -3.05267300             | -2.74676000 | -0.03850900 |
| O | -3.58693500             | 1.54662100  | -0.54150300 |
| O | -2.76227000             | 0.38255500  | 1.59038100  |
| H | -1.92377100             | 0.86933700  | 1.42253600  |
| O | -4.89436700             | -0.44339800 | 0.52809100  |
| H | -1.95908200             | -1.96073700 | 0.91617500  |
| P | 3.52255600              | -0.24185200 | 0.29642200  |
| C | 2.28779600              | 0.72997200  | -0.65067000 |
| H | 1.33473700              | 0.21666200  | -0.58448000 |
| H | 2.58184400              | 0.82366300  | -1.69142900 |
| C | 0.97754200              | 2.86354900  | -0.70199900 |
| H | 1.04295500              | 3.90234500  | -0.38256400 |
| H | 1.07123200              | 2.81456800  | -1.78192900 |
| C | -0.34584900             | 2.29695100  | -0.23771200 |
| O | -0.42634200             | 1.62372100  | 0.78155300  |
| O | -1.33634300             | 2.63001300  | -1.02154100 |
| H | -2.23384000             | 2.19581300  | -0.74861300 |
| N | 2.10566800              | 2.10708900  | -0.08613900 |
| H | 2.96728500              | 2.64089100  | -0.21641600 |
| O | 3.31261800              | 0.01650100  | 1.76011500  |
| O | 4.95036500              | 0.37157600  | -0.18298400 |
| H | 5.24170700              | 1.08644100  | 0.39854900  |
| O | 3.47414300              | -1.64681100 | -0.26439300 |
| H | 1.94493400              | 2.02631900  | 0.92271800  |

DZP<sub>12</sub> structure in aqueous solution at SMD-B3LYP-D3/6-311++G(2d,2p).

E(SCF) = -1783.54161784 u.a. ; Zero-point correction = 0.273649 u.a. ; G = -1783.319289 u.a.  
at 298,15K.

Charge = 0; Multiplicity = 1

|   | Coordinates (Angstroms) |             |             |
|---|-------------------------|-------------|-------------|
|   | X                       | Y           | Z           |
| P | 3.87049000              | -0.11438700 | 0.16780400  |
| C | 2.68415800              | 0.94632500  | -0.76076800 |
| H | 1.82752900              | 0.34543100  | -1.04893200 |
| H | 3.15272300              | 1.35003900  | -1.65335300 |
| C | 0.98395100              | 2.78057500  | -0.49259400 |
| H | 0.88155100              | 3.74882100  | -0.00571700 |
| H | 1.12152000              | 2.93291200  | -1.55876500 |
| C | -0.25706500             | 1.96502500  | -0.20587800 |
| O | -0.24432700             | 1.04360500  | 0.59944200  |
| O | -1.30408800             | 2.36935600  | -0.87538900 |
| H | -2.16347100             | 1.90621100  | -0.54909400 |
| N | 2.18405100              | 2.09326200  | 0.06743800  |
| H | 2.93387100              | 2.77625300  | 0.18789800  |
| O | 3.90260900              | -1.44159600 | -0.57194700 |
| O | 3.10715000              | -0.30423400 | 1.58517500  |
| H | 2.33123700              | -0.89715500 | 1.48214800  |
| O | 5.14534200              | 0.62456000  | 0.43223900  |
| H | 1.94514200              | 1.73968600  | 0.99995300  |
| P | -4.03029000             | 0.05334100  | 0.30751800  |
| C | -3.01998100             | -1.19257700 | -0.58699100 |
| H | -2.88320500             | -0.87014400 | -1.61563200 |
| H | -3.52002500             | -2.15653200 | -0.57194200 |
| C | -0.74087700             | -2.16763300 | -0.79993700 |
| H | -1.09414000             | -3.19626100 | -0.82955700 |
| H | -0.74277600             | -1.76153200 | -1.80634100 |
| C | 0.65540800              | -2.10423100 | -0.22732900 |
| O | 0.86104300              | -1.79776600 | 0.93883400  |
| O | 1.57559600              | -2.37072900 | -1.12230100 |
| H | 2.51334300              | -2.09246500 | -0.81435600 |
| N | -1.66976700             | -1.35438600 | 0.03491300  |
| H | -1.76633100             | -1.78470800 | 0.95693200  |
| O | -4.12971900             | -0.33491100 | 1.75129900  |
| O | -5.48537800             | -0.16928600 | -0.37361800 |
| H | -5.58290700             | 0.33057600  | -1.19524200 |
| O | -3.52248100             | 1.43528900  | -0.06220200 |
| H | -1.23658700             | -0.42676000 | 0.20444000  |

AC<sub>1</sub> structure in aqueous solution at SMD-B3LYP-D3/6-311++G(2d,2p).

E(SCF) = -1783.54799223 u.a. ; Zero-point correction = 0.273204 u.a. ; G = -1783.324869 u.a.  
at 298,15K.

Charge = 0; Multiplicity = 1

|   | Coordinates (Angstroms) |             |             |
|---|-------------------------|-------------|-------------|
|   | X                       | Y           | Z           |
| P | 3.47001900              | -0.13608400 | 0.26502000  |
| C | 2.42402500              | 0.95955100  | -0.75700800 |
| H | 1.50414300              | 0.42241000  | -0.97979900 |
| H | 2.93033000              | 1.21007000  | -1.68443700 |
| C | 0.94083700              | 2.97214700  | -0.68847200 |
| H | 0.96819600              | 4.00539100  | -0.34780100 |
| H | 1.05694100              | 2.94526500  | -1.76701300 |
| C | -0.36616100             | 2.34662900  | -0.24872700 |
| O | -0.41113500             | 1.62805700  | 0.74249700  |
| O | -1.37248000             | 2.67472000  | -1.00950500 |
| H | -2.25251700             | 2.19385500  | -0.74021400 |
| N | 2.07240500              | 2.23349400  | -0.05245200 |
| H | 2.89638100              | 2.83606200  | -0.01498200 |
| O | 3.60258600              | -1.43210400 | -0.61727100 |
| O | 2.56813900              | -0.47064600 | 1.52099700  |
| H | 1.70898600              | -0.94870200 | 1.25061600  |
| O | 4.76988500              | 0.47260500  | 0.64267800  |
| H | 1.79803600              | 2.02197700  | 0.91319700  |
| P | -3.50577300             | 0.15309500  | 0.21752200  |
| C | -2.37557700             | -0.90027200 | -0.77034700 |
| H | -1.44272200             | -0.36210700 | -0.91659000 |
| H | -2.81640300             | -1.12571900 | -1.73709800 |
| C | -0.93456300             | -2.94791000 | -0.71206600 |
| H | -0.98356300             | -3.97882600 | -0.36736100 |
| H | -1.05252100             | -2.92370900 | -1.79024500 |
| C | 0.40271200              | -2.35249600 | -0.28514900 |
| O | 0.40150700              | -1.62845100 | 0.74359300  |
| O | 1.39708200              | -2.66360300 | -0.99083200 |
| H | 2.71808500              | -1.94427100 | -0.73861100 |
| N | -2.06327600             | -2.19376600 | -0.08503500 |
| H | -2.90176200             | -2.77582600 | -0.06311900 |
| O | -3.55402300             | 1.48731800  | -0.51270100 |
| O | -2.68778300             | 0.32327800  | 1.60357300  |
| H | -1.86350100             | 0.83301100  | 1.43850400  |
| O | -4.78246200             | -0.56786200 | 0.52148300  |
| H | -1.79387400             | -1.99454400 | 0.88376300  |

AC<sub>2</sub> structure in aqueous solution at SMD-B3LYP-D3/6-311++G(2d,2p).

E(SCF) = -1783.54552535 u.a. ; Zero-point correction = 0.272838 u.a. ; G = -1783.323337 u.a.  
at 298,15K.

Charge = 0; Multiplicity = 1

|   | Coordinates (Angstroms) |             |             |
|---|-------------------------|-------------|-------------|
|   | X                       | Y           | Z           |
| P | -3.49230400             | 0.06756200  | 0.24147700  |
| C | -2.36196100             | -1.01484100 | -0.71622400 |
| H | -1.45510700             | -0.45517500 | -0.93422000 |
| H | -2.82711300             | -1.33045300 | -1.64527400 |
| C | -0.86041700             | -3.01193200 | -0.57180900 |
| H | -0.88824900             | -4.02730000 | -0.18134200 |
| H | -1.00555200             | -3.03653500 | -1.64628700 |
| C | 0.47999900              | -2.38598600 | -0.20416100 |
| O | 0.50539700              | -1.64247300 | 0.81018300  |
| O | 1.45320800              | -2.69578200 | -0.93999000 |
| H | 2.75050400              | -1.91864600 | -0.78899000 |
| N | -1.98134000             | -2.24273000 | 0.05075600  |
| H | -2.80190200             | -2.84230700 | 0.14710600  |
| O | -3.75184000             | 1.25792100  | -0.81041200 |
| O | -2.67067800             | 0.59922700  | 1.41386400  |
| H | -1.41423900             | 1.24441700  | 1.03813900  |
| O | -4.78188700             | -0.63297300 | 0.53582500  |
| H | -1.67493400             | -1.97164400 | 0.99143400  |
| P | 3.49483100              | -0.08941300 | 0.17958900  |
| C | 2.32221300              | 0.97737300  | -0.72719400 |
| H | 1.39973500              | 0.41890100  | -0.86998100 |
| H | 2.73496500              | 1.24929000  | -1.69418500 |
| C | 0.88036000              | 3.02213900  | -0.56813100 |
| H | 0.92520700              | 4.03096800  | -0.16168200 |
| H | 1.00911200              | 3.06616300  | -1.64425000 |
| C | -0.47368900             | 2.43721000  | -0.22744000 |
| O | -0.47384200             | 1.65435200  | 0.81431800  |
| O | -1.44983400             | 2.74521500  | -0.90133200 |
| H | -2.97482100             | 1.86424700  | -0.85013300 |
| N | 2.00936700              | 2.23575500  | 0.02158100  |
| H | 2.84448100              | 2.82506500  | 0.04578000  |
| O | 3.61553000              | -1.36202400 | -0.73634600 |
| O | 2.71359100              | -0.48827300 | 1.49742700  |
| H | 1.84437700              | -0.97018400 | 1.27869600  |
| O | 4.79120200              | 0.57447200  | 0.46521200  |
| H | 1.77362900              | 2.00871700  | 0.99261800  |

AC<sub>3</sub> structure in aqueous solution at SMD-B3LYP-D3/6-311++G(2d,2p).

E(SCF) = -1783.54693672 u.a. ; Zero-point correction = 0.273826 u.a. ; G = -1783.323153 u.a.  
at 298,15K.

Charge = 0; Multiplicity = 1

|   | Coordinates (Angstroms) |             |             |
|---|-------------------------|-------------|-------------|
|   | X                       | Y           | Z           |
| P | 3.64975200              | 0.20439600  | 0.04287400  |
| C | 2.61285100              | -0.77514600 | -1.10763000 |
| H | 3.16917900              | -0.86175900 | -2.03765800 |
| H | 1.69744900              | -0.22800800 | -1.30627100 |
| C | 1.32995900              | -2.30341700 | 0.49320300  |
| H | 1.26255600              | -3.36229300 | 0.73469500  |
| H | 1.75569400              | -1.78025300 | 1.34164000  |
| C | -0.06128900             | -1.79371700 | 0.19554100  |
| O | -0.41799700             | -1.47889700 | -0.93399200 |
| O | -0.80316300             | -1.77329100 | 1.26754400  |
| H | -1.78390100             | -1.49262700 | 1.08031000  |
| N | 2.24348800              | -2.16679000 | -0.68271000 |
| H | 1.79760600              | -2.61635000 | -1.48731700 |
| O | 5.02065800              | -0.33794300 | 0.21252500  |
| H | 3.09570400              | -2.69723700 | -0.48549900 |
| O | 2.87409500              | 0.31451700  | 1.41279000  |
| H | 1.95566100              | 0.75711200  | 1.31321800  |
| O | 3.60710300              | 1.62261700  | -0.65399000 |
| P | -3.80244600             | -0.28342500 | -0.13211300 |
| C | -3.48802000             | 1.46215100  | 0.34228000  |
| H | -4.11268900             | 1.67243600  | 1.20647500  |
| H | -3.75390600             | 2.14521100  | -0.45844100 |
| C | -1.15285100             | 2.09048700  | -0.38793800 |
| H | -1.35345100             | 1.42541300  | -1.22359000 |
| H | -1.36991700             | 3.11031900  | -0.68792300 |
| C | 0.30618500              | 1.93468300  | 0.00725000  |
| O | 0.55342600              | 1.32882800  | 1.08436100  |
| O | 1.14511500              | 2.39295400  | -0.80982200 |
| H | 2.65594000              | 1.99209500  | -0.69582600 |
| N | -2.06394500             | 1.72254000  | 0.74003000  |
| H | -2.04008800             | 2.47647100  | 1.42784100  |
| O | -3.22361300             | -1.14399700 | 0.98430300  |
| H | -1.67138300             | 0.90339700  | 1.21547600  |
| O | -2.93734100             | -0.53210600 | -1.47098800 |
| H | -2.03522100             | -0.87862800 | -1.27503100 |
| O | -5.25786300             | -0.38772600 | -0.46535300 |

AC<sub>4</sub> structure in aqueous solution at SMD-B3LYP-D3/6-311++G(2d,2p).

E(SCF) = -1783.54495180 u.a. ; Zero-point correction = 0.272896 u.a. ; G = -1783.322444 u.a.  
at 298,15K.

Charge = 0; Multiplicity = 1

|   | Coordinates (Angstroms) |             |             |
|---|-------------------------|-------------|-------------|
|   | X                       | Y           | Z           |
| P | 3.71010300              | 0.10627800  | -0.04319800 |
| C | 2.52281000              | -0.89953400 | -1.02894300 |
| H | 2.99899100              | -1.14138700 | -1.97553400 |
| H | 1.62725100              | -0.32217800 | -1.23055700 |
| C | 1.16069900              | -2.10084200 | 0.76065900  |
| H | 1.10669500              | -3.08634900 | 1.21691300  |
| H | 1.57213100              | -1.40266400 | 1.48082100  |
| C | -0.23982400             | -1.67182700 | 0.35875900  |
| O | -0.51033600             | -1.53491000 | -0.86048700 |
| O | -1.03668500             | -1.49638100 | 1.32275800  |
| H | -2.59187000             | -1.48368700 | 0.95710300  |
| N | 2.09889700              | -2.19824800 | -0.40423300 |
| H | 1.64489300              | -2.75713500 | -1.12963600 |
| O | 5.05441700              | -0.55145600 | -0.00709100 |
| H | 2.92819200              | -2.71484900 | -0.10483900 |
| O | 3.05761800              | 0.47727900  | 1.28458600  |
| H | 1.70210300              | 1.03001800  | 1.21642500  |
| O | 3.77961800              | 1.41984200  | -0.98004000 |
| P | -3.80289700             | -0.19098800 | -0.32793300 |
| C | -3.38394600             | 1.35428700  | 0.56640600  |
| H | -3.95601300             | 1.36219000  | 1.49001500  |
| H | -3.67297600             | 2.21272100  | -0.03315800 |
| C | -1.09530200             | 2.11222100  | -0.15387100 |
| H | -1.33390200             | 1.62438100  | -1.09401200 |
| H | -1.35164500             | 3.16504500  | -0.22862000 |
| C | 0.38661900              | 1.95526700  | 0.08794200  |
| O | 0.69477800              | 1.30674600  | 1.17731800  |
| O | 1.17913300              | 2.39756600  | -0.73478800 |
| H | 2.93537000              | 1.91780500  | -0.91006300 |
| N | -1.92910400             | 1.49699300  | 0.92590100  |
| H | -1.85509300             | 2.07798800  | 1.76299600  |
| O | -3.56721900             | -1.36261200 | 0.70972000  |
| H | -1.52417200             | 0.58713500  | 1.18672500  |
| O | -2.73255700             | -0.36114400 | -1.47601200 |
| H | -1.87268100             | -0.84327200 | -1.21274100 |
| O | -5.20129800             | -0.11289800 | -0.81374600 |

AC<sub>5</sub> structure in aqueous solution at SMD-B3LYP-D3/6-311++G(2d,2p).

E(SCF) = -1783.54577097 u.a. ; Zero-point correction = 0.273896 u.a. ; G = -1783.322453 u.a.  
at 298,15K.

Charge = 0; Multiplicity = 1

|   | Coordinates (Angstroms) |             |             |
|---|-------------------------|-------------|-------------|
|   | X                       | Y           | Z           |
| P | 3.70787400              | 0.15520700  | -0.11150600 |
| C | 2.47851200              | -0.84311500 | -1.05184500 |
| H | 2.90835300              | -1.02166000 | -2.03476100 |
| H | 1.55988200              | -0.28491500 | -1.18445100 |
| C | 1.18325200              | -2.17468700 | 0.69307800  |
| H | 1.10356900              | -3.19886100 | 1.05169600  |
| H | 1.61397500              | -1.56386700 | 1.47648100  |
| C | -0.21083300             | -1.68126900 | 0.34133200  |
| O | -0.52165900             | -1.55960700 | -0.87059800 |
| O | -0.96201400             | -1.45663600 | 1.33022900  |
| H | -2.51724700             | -1.44734200 | 1.02047600  |
| N | 2.11460400              | -2.18492900 | -0.48013100 |
| H | 1.67531900              | -2.72845400 | -1.22600200 |
| O | 5.03425100              | -0.54064800 | -0.09365800 |
| H | 2.96661700              | -2.68103600 | -0.21046400 |
| O | 3.16249200              | 0.20265400  | 1.40967000  |
| H | 2.33724100              | 0.73243600  | 1.45718700  |
| O | 3.58018800              | 1.54410900  | -0.72200900 |
| P | -3.79354400             | -0.22126800 | -0.27665000 |
| C | -3.37906300             | 1.37523200  | 0.52407600  |
| H | -3.94985200             | 1.43237200  | 1.44677200  |
| H | -3.67681300             | 2.19303700  | -0.12596900 |
| C | -1.09235200             | 2.08370600  | -0.24470100 |
| H | -1.29617200             | 1.50530600  | -1.14042900 |
| H | -1.36519400             | 3.12056900  | -0.42313900 |
| C | 0.37094600              | 1.96641000  | 0.09900600  |
| O | 0.74708100              | 1.52299800  | 1.17589600  |
| O | 1.14304500              | 2.35219700  | -0.88559500 |
| H | 2.12797200              | 2.09486800  | -0.74210500 |
| N | -1.92698800             | 1.55541000  | 0.87400500  |
| H | -1.85953900             | 2.20550300  | 1.65938400  |
| O | -3.50334500             | -1.33749100 | 0.80601100  |
| H | -1.51504400             | 0.67458200  | 1.21205300  |
| O | -2.76408300             | -0.42815600 | -1.45460900 |
| H | -1.88763600             | -0.88963900 | -1.20246300 |
| O | -5.21051500             | -0.18729600 | -0.71217700 |

AC<sub>6</sub> structure in aqueous solution at SMD-B3LYP-D3/6-311++G(2d,2p).

E(SCF) = -1783.54527078 u.a. ; Zero-point correction = 0.273656 u.a. ; G = -1783.321264 u.a.  
at 298,15K.

Charge = 0; Multiplicity = 1

|   | Coordinates (Angstroms) |             |             |
|---|-------------------------|-------------|-------------|
|   | X                       | Y           | Z           |
| P | 3.65151000              | 0.17554200  | 0.02637100  |
| C | 2.59525000              | -0.80274400 | -1.10825300 |
| H | 3.15168800              | -0.91888300 | -2.03517700 |
| H | 1.69372700              | -0.23777900 | -1.31961900 |
| C | 1.28856300              | -2.28588300 | 0.52895000  |
| H | 1.19174900              | -3.34467000 | 0.76132600  |
| H | 1.75071100              | -1.78593300 | 1.37171800  |
| C | -0.10298100             | -1.73694600 | 0.31551300  |
| O | -0.40513700             | -1.43701500 | -0.91513400 |
| O | -0.85239500             | -1.64757000 | 1.28171100  |
| H | -2.54099400             | -1.39092000 | 1.12310300  |
| N | 2.19365300              | -2.17822200 | -0.66108700 |
| H | 1.73627200              | -2.63035600 | -1.45723200 |
| O | 5.02014800              | -0.37621700 | 0.18363000  |
| H | 3.03537300              | -2.72520400 | -0.46263500 |
| O | 2.89262400              | 0.29915200  | 1.40380600  |
| H | 1.98089300              | 0.75832000  | 1.31507600  |
| O | 3.61292900              | 1.59026800  | -0.67846400 |
| P | -3.77158800             | -0.25354000 | -0.27177800 |
| C | -3.46361800             | 1.43713200  | 0.38202500  |
| H | -4.07524200             | 1.57225100  | 1.26949000  |
| H | -3.74407500             | 2.18261900  | -0.35619200 |
| C | -1.13887600             | 2.08867500  | -0.35589900 |
| H | -1.34672100             | 1.44270600  | -1.20405200 |
| H | -1.36874600             | 3.11518300  | -0.62291200 |
| C | 0.32540900              | 1.93739200  | 0.02067100  |
| O | 0.58790900              | 1.35272800  | 1.10607300  |
| O | 1.15364300              | 2.38026300  | -0.81568600 |
| H | 2.66504700              | 1.96770700  | -0.71355300 |
| N | -2.03297800             | 1.68171000  | 0.77199600  |
| H | -2.00350400             | 2.41408900  | 1.48276600  |
| O | -3.50223700             | -1.19033300 | 1.01293300  |
| H | -1.62681200             | 0.85249000  | 1.21759500  |
| O | -2.72095800             | -0.56422000 | -1.33098400 |
| H | -1.37864500             | -1.07592700 | -1.02428400 |
| O | -5.21987200             | -0.32904300 | -0.64022400 |



AC<sub>7</sub> structure in aqueous solution at SMD-B3LYP-D3/6-311++G(2d,2p).

E(SCF) = -1783.54358209 u.a. ; Zero-point correction = 0.272830 u.a. ; G = -1783.321886 u.a.  
at 298,15K.

Charge = 0; Multiplicity = 1

|   | Coordinates (Angstroms) |             |             |
|---|-------------------------|-------------|-------------|
|   | X                       | Y           | Z           |
| P | -3.66281100             | -0.29829400 | -0.19727100 |
| C | -2.65978000             | 0.96735100  | 0.66298900  |
| H | -1.77105400             | 0.47208000  | 1.04581400  |
| H | -3.21658300             | 1.38749300  | 1.49520900  |
| C | -1.11241400             | 2.90013700  | 0.35320800  |
| H | -1.04319000             | 3.82806600  | -0.21235500 |
| H | -1.34968000             | 3.12200900  | 1.38714400  |
| C | 0.22499800              | 2.19279400  | 0.25455600  |
| O | 0.34789700              | 1.44118700  | -0.80480900 |
| O | 1.08776300              | 2.38122500  | 1.10293000  |
| H | 2.47914600              | 1.33482600  | 1.16281200  |
| N | -2.22377300             | 2.08552700  | -0.23323600 |
| H | -3.01881500             | 2.69907700  | -0.42370900 |
| O | -3.61587800             | -1.51746800 | 0.80078600  |
| O | -2.80909100             | -0.66577800 | -1.47811200 |
| H | -1.92953000             | -1.12002100 | -1.24255700 |
| O | -5.03555200             | 0.14634300  | -0.54045900 |
| H | -1.91321000             | 1.70319900  | -1.13223300 |
| P | 3.69806900              | 0.17059900  | -0.23283500 |
| C | 3.47532900              | -1.64924100 | -0.10009100 |
| H | 3.80960600              | -2.02555100 | 0.86234400  |
| H | 4.07180800              | -2.10476600 | -0.88589800 |
| C | 1.14105400              | -1.92368600 | 0.84960700  |
| H | 1.34946100              | -2.71769500 | 1.55826100  |
| H | 1.33937700              | -0.96392600 | 1.32215000  |
| C | -0.31458900             | -1.93292500 | 0.40502700  |
| O | -0.54890900             | -1.71994500 | -0.81375400 |
| O | -1.16624400             | -2.09995300 | 1.31686600  |
| H | -2.65500900             | -1.81568600 | 0.99923900  |
| N | 2.05534900              | -2.07382100 | -0.32281600 |
| H | 2.04018700              | -3.05069900 | -0.61929000 |
| O | 3.26304300              | 0.73889100  | 1.21215000  |
| O | 2.68879700              | 0.65575200  | -1.26980500 |
| H | 1.31686200              | 1.08053000  | -0.93491500 |
| O | 5.15779500              | 0.41604100  | -0.46236800 |
| H | 1.65616300              | -1.53238900 | -1.09724300 |

AC<sub>8</sub> structure in aqueous solution at SMD-B3LYP-D3/6-311++G(2d,2p).

E(SCF) = -1783.54204454 u.a. ; Zero-point correction = 0.272383 u.a. ; G = -1783.321305 u.a.  
at 298,15K.

Charge = 0; Multiplicity = 1

|   | Coordinates (Angstroms) |             |             |
|---|-------------------------|-------------|-------------|
|   | X                       | Y           | Z           |
| P | 3.52519400              | -0.16553600 | 0.25186500  |
| C | 2.48574000              | 0.95055800  | -0.75427700 |
| H | 1.55719200              | 0.42769200  | -0.97496000 |
| H | 2.98922600              | 1.20075400  | -1.68338700 |
| C | 1.03385100              | 2.98623100  | -0.66089400 |
| H | 1.08437600              | 4.01732000  | -0.31664400 |
| H | 1.13877000              | 2.96146100  | -1.74070200 |
| C | -0.27668800             | 2.37826000  | -0.20464200 |
| O | -0.33344900             | 1.64289000  | 0.76543400  |
| O | -1.29516500             | 2.74479400  | -0.94695400 |
| H | -2.15856300             | 2.29328800  | -0.62505200 |
| N | 2.15710700              | 2.22372400  | -0.03774600 |
| H | 2.99060300              | 2.81258700  | 0.00387600  |
| O | 3.63384500              | -1.45780500 | -0.63944100 |
| O | 2.63260200              | -0.49818800 | 1.51463100  |
| H | 1.76801100              | -0.97430200 | 1.25817700  |
| O | 4.83615200              | 0.42480200  | 0.62078800  |
| H | 1.87953700              | 2.00642100  | 0.92596700  |
| P | -3.48144100             | 0.20026400  | 0.31202600  |
| C | -2.24884000             | -0.75731900 | -0.65033500 |
| H | -1.29629900             | -0.24094800 | -0.59737300 |
| H | -2.55664300             | -0.85041500 | -1.68769400 |
| C | -0.92774500             | -2.88552200 | -0.71993300 |
| H | -1.00417200             | -3.92574600 | -0.40921000 |
| H | -1.03391800             | -2.82524400 | -1.79802900 |
| C | 0.42142400              | -2.33881500 | -0.27004400 |
| O | 0.44412800              | -1.65201300 | 0.78294400  |
| O | 1.40546400              | -2.65227900 | -0.99059300 |
| H | 2.74198000              | -1.95886500 | -0.75040000 |
| N | -2.05464100             | -2.13197400 | -0.08963900 |
| H | -2.91857600             | -2.66523500 | -0.20152600 |
| O | -3.24313700             | -0.03350500 | 1.77315100  |
| O | -4.89757900             | -0.51477100 | -0.04352000 |
| H | -5.22498600             | -0.26190700 | -0.91703800 |
| O | -3.48128100             | 1.60442200  | -0.26219100 |
| H | -1.86918000             | -2.04715900 | 0.91407100  |

AC<sub>10</sub> structure in aqueous solution at SMD-B3LYP-D3/6-311++G(2d,2p).

E(SCF) = -1783.54450453 u.a. ; Zero-point correction = 0.274062 u.a. ; G = -1783.320718 u.a.  
at 298,15K.

Charge = 0; Multiplicity = 1

|   | Coordinates (Angstroms) |             |             |
|---|-------------------------|-------------|-------------|
|   | X                       | Y           | Z           |
| P | 3.69415200              | 0.01471900  | 0.12530100  |
| C | 2.39159200              | 1.01965300  | -0.67540200 |
| H | 1.54148300              | 0.37757900  | -0.89342300 |
| H | 2.77292200              | 1.44016200  | -1.60127700 |
| C | 0.77129200              | 2.90388500  | -0.39398300 |
| H | 0.68905100              | 3.85215200  | 0.13461700  |
| H | 0.97109300              | 3.09007300  | -1.44300900 |
| C | -0.51568200             | 2.13205100  | -0.18727400 |
| O | -0.66548800             | 1.41311300  | 0.79392700  |
| O | -1.40000300             | 2.34287300  | -1.12127300 |
| H | -2.25448900             | 1.76962100  | -0.99464300 |
| N | 1.91691800              | 2.14452500  | 0.19342300  |
| H | 2.68848600              | 2.79238400  | 0.36670300  |
| O | 3.82067600              | -1.23489200 | -0.83045100 |
| O | 3.05638100              | -0.45646700 | 1.49052000  |
| H | 2.19090200              | -0.98201000 | 1.33700800  |
| O | 4.96998500              | 0.74913100  | 0.30905900  |
| H | 1.62193200              | 1.76695600  | 1.10074700  |
| P | -3.88603700             | -0.02167300 | 0.11340100  |
| C | -3.00872800             | -1.61089800 | -0.18165600 |
| H | -3.32446500             | -2.03043600 | -1.13304100 |
| H | -3.22299500             | -2.31314700 | 0.61867800  |
| C | -0.69502000             | -2.59757100 | -0.53227900 |
| H | -1.07757500             | -3.43451600 | 0.04810300  |
| H | -0.76688500             | -2.81479500 | -1.59130500 |
| C | 0.74110600              | -2.29767700 | -0.10296800 |
| O | 0.85982200              | -1.64412700 | 0.97098900  |
| O | 1.67306500              | -2.70544600 | -0.83816100 |
| H | 3.01352700              | -1.85003100 | -0.80700500 |
| N | -1.53215500             | -1.39600700 | -0.22441700 |
| H | -1.20737800             | -1.03335000 | 0.67782500  |
| O | -3.48726200             | 0.92653000  | -1.00933900 |
| O | -3.22910900             | 0.51141700  | 1.49383600  |
| H | -2.35827400             | 0.93511900  | 1.33509300  |
| O | -5.33357300             | -0.31867900 | 0.34461600  |
| H | -1.31571900             | -0.66535800 | -0.90704200 |

AC<sub>11</sub> structure in aqueous solution at SMD-B3LYP-D3/6-311++G(2d,2p).

E(SCF) = -1783.54184701 u.a. ; Zero-point correction = 0.272576 u.a. ; G = -1783.320721 u.a.  
at 298,15K.

Charge = 0; Multiplicity = 1

|   | Coordinates (Angstroms) |             |             |
|---|-------------------------|-------------|-------------|
|   | X                       | Y           | Z           |
| P | 3.51651400              | -0.16694200 | 0.26865500  |
| C | 2.48288600              | 0.94496900  | -0.74822200 |
| H | 1.55551600              | 0.42153800  | -0.97229600 |
| H | 2.99224200              | 1.19069800  | -1.67532700 |
| C | 1.03270400              | 2.98322200  | -0.67344900 |
| H | 1.08493800              | 4.01661500  | -0.33650800 |
| H | 1.14246200              | 2.95006200  | -1.75260300 |
| C | -0.28150700             | 2.38210500  | -0.21874600 |
| O | -0.34329000             | 1.65134800  | 0.75438300  |
| O | -1.29697200             | 2.74792400  | -0.96610400 |
| H | -2.16147900             | 2.29784800  | -0.64814400 |
| N | 2.15078800              | 2.22157200  | -0.03958600 |
| H | 2.98480000              | 2.80946400  | 0.00516300  |
| O | 3.63570900              | -1.46047400 | -0.61965500 |
| O | 2.61450100              | -0.49990400 | 1.52474800  |
| H | 1.75553100              | -0.98166600 | 1.26169700  |
| O | 4.82279300              | 0.42734000  | 0.64756800  |
| H | 1.86651000              | 2.00843600  | 0.92310900  |
| P | -3.46925900             | 0.21099000  | 0.30639000  |
| C | -2.24385400             | -0.74814300 | -0.66343300 |
| H | -1.28875700             | -0.23682000 | -0.60923900 |
| H | -2.55610200             | -0.83170100 | -1.69990700 |
| C | -0.92789100             | -2.87808400 | -0.75062700 |
| H | -1.00920000             | -3.92191700 | -0.45359100 |
| H | -1.02999900             | -2.80302500 | -1.82817100 |
| C | 0.42080700              | -2.34088800 | -0.28762300 |
| O | 0.43911200              | -1.66834000 | 0.77472900  |
| O | 1.40790100              | -2.64677000 | -1.00705400 |
| H | 2.74451100              | -1.95921400 | -0.74515100 |
| N | -2.05350300             | -2.12793300 | -0.11390200 |
| H | -2.91839900             | -2.65875500 | -0.23023300 |
| O | -3.20190500             | 0.00147600  | 1.76838600  |
| O | -4.89268700             | -0.46321600 | -0.10388900 |
| H | -5.14352300             | -1.16270200 | 0.51427800  |
| O | -3.49047500             | 1.60288200  | -0.29084400 |
| H | -1.86523100             | -2.05226200 | 0.89010600  |

AC<sub>12</sub> structure in aqueous solution at SMD-B3LYP-D3/6-311++G(2d,2p).

E(SCF) = -1783.54156235 u.a. ; Zero-point correction = 0.272654 u.a. ; G = -1783.320138 u.a.  
at 298,15K.

Charge = 0; Multiplicity = 1

|   | Coordinates (Angstroms) |             |             |
|---|-------------------------|-------------|-------------|
|   | X                       | Y           | Z           |
| P | 3.81605200              | -0.05189800 | 0.17027000  |
| C | 2.62457400              | 1.00928400  | -0.72913400 |
| H | 1.77697100              | 0.39765500  | -1.02525600 |
| H | 3.09320000              | 1.42517400  | -1.61590900 |
| C | 0.92192800              | 2.83082400  | -0.45698400 |
| H | 0.82139800              | 3.79895900  | 0.03013700  |
| H | 1.06825600              | 2.98077200  | -1.52206400 |
| C | -0.31772500             | 2.01295500  | -0.17004500 |
| O | -0.30077100             | 1.11240600  | 0.65865800  |
| O | -1.35994400             | 2.38684400  | -0.86147500 |
| H | -2.21783800             | 1.91353000  | -0.53411000 |
| N | 2.11510200              | 2.13732000  | 0.11534500  |
| H | 2.86200700              | 2.81935800  | 0.26086900  |
| O | 3.93909000              | -1.32818500 | -0.74826400 |
| O | 3.06458400              | -0.45980100 | 1.50042600  |
| H | 2.22199800              | -1.00585000 | 1.33385400  |
| O | 5.11349400              | 0.61636400  | 0.43530600  |
| H | 1.85019000              | 1.76912800  | 1.03585400  |
| P | -4.00814500             | 0.00749000  | 0.28002000  |
| C | -2.94530800             | -1.17891700 | -0.63218200 |
| H | -2.77966700             | -0.81407600 | -1.64233400 |
| H | -3.43290700             | -2.14870600 | -0.67432900 |
| C | -0.66287100             | -2.16383700 | -0.78928800 |
| H | -1.03738100             | -3.18311700 | -0.84897200 |
| H | -0.63383500             | -1.74006500 | -1.78844200 |
| C | 0.73837600              | -2.14383200 | -0.19699200 |
| O | 0.87401100              | -1.72413100 | 0.98128900  |
| O | 1.65852700              | -2.53139100 | -0.96593400 |
| H | 3.07492900              | -1.86287400 | -0.80952000 |
| N | -1.61541400             | -1.35243400 | 0.02540600  |
| H | -1.73775800             | -1.79085800 | 0.93982700  |
| O | -4.10557800             | -0.42321000 | 1.71203800  |
| O | -5.45036700             | -0.24634200 | -0.41893500 |
| H | -5.55846300             | 0.27064200  | -1.22854300 |
| O | -3.55240000             | 1.41921800  | -0.04588300 |
| H | -1.18653500             | -0.43079800 | 0.21926500  |

NZP<sub>2</sub> structure in aqueous solution at SMD-B3LYP-D3/6-311++G(2d,2p).

E(SCF) = -1783.52621249 u.a. ; Zero-point correction = 0.271964 u.a. ; G = -1783.305563 u.a.  
at 298,15K.

Charge = 0; Multiplicity = 1

|   | Coordinates (Angstroms) |             |             |
|---|-------------------------|-------------|-------------|
|   | X                       | Y           | Z           |
| P | -2.28139500             | 0.87194200  | 0.21414600  |
| C | -3.68026000             | -0.29715000 | 0.29562700  |
| H | -4.52481700             | 0.22576700  | -0.15051700 |
| H | -3.91168300             | -0.44227800 | 1.35001900  |
| C | -2.51013500             | -2.49142100 | 0.18114800  |
| H | -2.46830400             | -2.39751500 | 1.26380300  |
| H | -2.79334300             | -3.52643600 | -0.02681600 |
| C | -1.10535400             | -2.35433800 | -0.37381800 |
| O | -0.82625300             | -1.69667400 | -1.37395200 |
| O | -0.21212800             | -3.06031600 | 0.28697800  |
| H | 0.71864600              | -2.87545400 | -0.07984700 |
| N | -3.51749400             | -1.59166200 | -0.36492000 |
| H | -3.35933200             | -1.45667400 | -1.35724200 |
| O | -1.69258500             | 0.80748700  | -1.26668800 |
| H | -1.37018000             | -0.10406900 | -1.47932700 |
| O | -1.20663200             | 0.16432900  | 1.17066500  |
| H | -0.41345100             | 0.71951500  | 1.29630000  |
| O | -2.56759200             | 2.29938100  | 0.55793700  |
| P | 2.73981200              | -1.19925800 | 0.10861900  |
| C | 2.06027600              | 0.23619700  | -0.81232600 |
| H | 0.98874900              | 0.29500800  | -0.64463900 |
| H | 2.25462700              | 0.13812500  | -1.87597200 |
| C | 1.94610100              | 2.74371300  | -0.76354600 |
| H | 2.57149300              | 3.61664600  | -0.58274700 |
| H | 1.71183200              | 2.67671000  | -1.82078900 |
| C | 0.69569300              | 2.84127900  | 0.07828400  |
| O | 0.61038400              | 2.28731300  | 1.16104600  |
| O | -0.26408200             | 3.55413700  | -0.47844700 |
| H | -1.10537000             | 3.41219400  | 0.02079700  |
| N | 2.69091900              | 1.52036800  | -0.34544500 |
| H | 3.64887600              | 1.56398300  | -0.69671900 |
| O | 2.16745700              | -2.45098800 | -0.52291200 |
| O | 2.09846700              | -0.97853100 | 1.58849200  |
| H | 1.14209900              | -1.12937000 | 1.59750200  |
| O | 4.22222000              | -1.03801300 | 0.25284800  |
| H | 2.74794400              | 1.51797400  | 0.67732000  |

DN<sub>2</sub> structure in aqueous solution at SMD-B3LYP-D3/6-311++G(2d,2p).

E(SCF) = -1783.51140515 u.a. ; Zero-point correction = 0.270132 u.a. ; G = -1783.291370 u.a.  
at 298,15K.

Charge = 0; Multiplicity = 1

|   | Coordinates (Angstroms) |             |             |
|---|-------------------------|-------------|-------------|
|   | X                       | Y           | Z           |
| P | 2.42387700              | -1.15300700 | 0.68830200  |
| C | 3.93876700              | -0.19744100 | 0.32804000  |
| H | 4.68865900              | -0.93993600 | 0.05988700  |
| H | 4.24876700              | 0.23793500  | 1.27864600  |
| C | 3.02645300              | 1.97552800  | -0.44661300 |
| H | 3.04997300              | 2.23902900  | 0.60830400  |
| H | 3.38938600              | 2.84942900  | -0.99358300 |
| C | 1.58589600              | 1.81109800  | -0.87927300 |
| O | 1.19043100              | 0.93339100  | -1.63274400 |
| O | 0.78480400              | 2.75668000  | -0.39888200 |
| H | -0.14138400             | 2.54237100  | -0.64407300 |
| N | 3.89750800              | 0.83753800  | -0.70279000 |
| H | 3.67286500              | 0.42342800  | -1.60013300 |
| O | 1.73583400              | -1.54558400 | -0.69772900 |
| H | 1.50978500              | -0.74539000 | -1.23021200 |
| O | 1.35703900              | -0.07849600 | 1.26501900  |
| H | 1.68154100              | 0.40308000  | 2.04083100  |
| O | 2.63430000              | -2.34506500 | 1.54610400  |
| P | -2.38222400             | 1.13244500  | 0.71623900  |
| C | -3.92603400             | 0.21436600  | 0.39573300  |
| H | -4.67023200             | 0.97056500  | 0.15126300  |
| H | -4.21982800             | -0.22629400 | 1.34848300  |
| C | -3.07370600             | -1.96652300 | -0.42891600 |
| H | -3.08499200             | -2.25126100 | 0.61993800  |
| H | -3.45732000             | -2.82283600 | -0.98949700 |
| C | -1.63811200             | -1.81029400 | -0.88148200 |
| O | -1.25380900             | -0.94944600 | -1.65879500 |
| O | -0.82886100             | -2.74544000 | -0.38965900 |
| H | 0.09339200              | -2.53443300 | -0.64694800 |
| N | -3.93234000             | -0.81100300 | -0.64769100 |
| H | -3.72208700             | -0.39000200 | -1.54552100 |
| O | -1.77133500             | 1.57103700  | -0.70792800 |
| H | -1.54418200             | 0.78532700  | -1.25433200 |
| O | -1.42757000             | -0.01568400 | 1.27764600  |
| H | -0.46114900             | 0.10902600  | 1.18362600  |
| O | -2.53255300             | 2.33263600  | 1.58117300  |

**8- Structures and energetics of transition states (TS) for DZP<sub>9</sub> and AC<sub>9</sub> conversions in the gas phase at B3LYP-D3/6-311++G(2d,2p) level.**

Structure of TS<sub>1</sub> in the gas phase at B3LYP-D3/6-311++G(2d,2p).

E(SCF) = -1783.44801571 u.a. ; Zero-point correction = 0.268072 u.a. ; G = -1783.231120 u.a. at 298,15K.

Charge = 0; Multiplicity = 1

| Coordinates (Angstroms) |             |             |             |
|-------------------------|-------------|-------------|-------------|
|                         | X           | Y           | Z           |
| P                       | -3.60576400 | -0.04731100 | 0.52980800  |
| C                       | -2.02474200 | 0.93530500  | 0.56214600  |
| H                       | -1.16635000 | 0.36560600  | 0.90122900  |
| H                       | -2.16263100 | 1.80568100  | 1.19752300  |
| C                       | -0.86255500 | 2.56500500  | -0.98760500 |
| H                       | -0.95065500 | 2.94007800  | -2.00489100 |
| H                       | -1.14605300 | 3.33455200  | -0.27719600 |
| C                       | 0.56858500  | 2.06551200  | -0.77177500 |
| O                       | 0.97250700  | 1.16345300  | -1.49561000 |
| O                       | 1.20334900  | 2.62779400  | 0.19700500  |
| H                       | 2.17523100  | 2.14553000  | 0.37484500  |
| N                       | -1.78508100 | 1.40006200  | -0.84457900 |
| H                       | -2.72866300 | 1.56428700  | -1.23032000 |
| O                       | -4.31072800 | 0.49035000  | -0.66088700 |
| O                       | -4.30224400 | 0.40128600  | 1.91552100  |
| H                       | -4.39173400 | -0.34881800 | 2.51291000  |
| O                       | -3.30421500 | -1.53576400 | 0.70417700  |
| H                       | -1.40907700 | 0.57538400  | -1.35607200 |
| P                       | 3.60830600  | 0.04033500  | 0.53461000  |
| C                       | 2.01820100  | -0.93731900 | 0.55184600  |
| H                       | 1.15767700  | -0.36432200 | 0.87975700  |
| H                       | 2.14088500  | -1.81023600 | 1.18662600  |
| C                       | 0.85829000  | -2.55802200 | -1.00659800 |
| H                       | 0.94006400  | -2.92882400 | -2.02623600 |
| H                       | 1.13525500  | -3.33386500 | -0.30075800 |
| C                       | -0.56815800 | -2.04230800 | -0.77789100 |
| O                       | -0.93206400 | -1.09569000 | -1.48304600 |
| O                       | -1.22952500 | -2.61515500 | 0.14677600  |
| H                       | -2.28452100 | -2.07522100 | 0.36730900  |
| N                       | 1.79308100  | -1.40381600 | -0.85736100 |
| H                       | 2.74528600  | -1.57174300 | -1.22467700 |
| O                       | 4.31073400  | -0.51841100 | -0.65267100 |
| O                       | 4.29191900  | -0.44288800 | 1.92170600  |
| H                       | 4.39152200  | 0.30440800  | 2.52073100  |
| O                       | 3.31181400  | 1.51867500  | 0.70561800  |
| H                       | 1.42953600  | -0.58982500 | -1.38289200 |



Structure of TS<sub>2</sub> in the gas phase at B3LYP-D3/6-311++G(2d,2p).

E(SCF) = -1783.44863432 u.a. ; Zero-point correction = 0.268101 u.a. ; G = -1783.232787 u.a.  
at 298,15K.

Charge = 0; Multiplicity = 1

| Coordinates (Angstroms) |             |             |             |
|-------------------------|-------------|-------------|-------------|
|                         | X           | Y           | Z           |
| P                       | 3.58584400  | 0.06623900  | 0.57821400  |
| C                       | 2.03441100  | -0.95835200 | 0.52658200  |
| H                       | 1.15369700  | -0.42689500 | 0.87109700  |
| H                       | 2.17691300  | -1.85054900 | 1.12977300  |
| C                       | 0.89551500  | -2.52828600 | -1.08805600 |
| H                       | 0.95964000  | -2.84262200 | -2.12739600 |
| H                       | 1.19350200  | -3.33546400 | -0.42692900 |
| C                       | -0.53120800 | -2.03281300 | -0.79348700 |
| O                       | -0.91612200 | -1.08300000 | -1.50733000 |
| O                       | -1.14948900 | -2.59010800 | 0.14554900  |
| H                       | -2.38182200 | -1.96863000 | 0.50175200  |
| N                       | 1.82927300  | -1.37668000 | -0.89885000 |
| H                       | 2.77680800  | -1.53878200 | -1.26955300 |
| O                       | 4.34618400  | -0.40235700 | -0.60715900 |
| O                       | 4.25505200  | -0.42197800 | 1.96794300  |
| H                       | 4.29645000  | 0.30607200  | 2.59672400  |
| O                       | 3.22509800  | 1.53285100  | 0.80546400  |
| H                       | 1.46943500  | -0.54274400 | -1.40211900 |
| P                       | -3.60410300 | -0.03784800 | 0.55579000  |
| C                       | -2.06169600 | 0.98821000  | 0.52200700  |
| H                       | -1.19906600 | 0.47048700  | 0.92813200  |
| H                       | -2.23511700 | 1.90024600  | 1.08671800  |
| C                       | -0.86055000 | 2.49108900  | -1.11745500 |
| H                       | -0.91966900 | 2.77657100  | -2.16463400 |
| H                       | -1.16510600 | 3.31455500  | -0.47898300 |
| C                       | 0.56574800  | 2.01321800  | -0.81595300 |
| O                       | 1.04901700  | 1.17142100  | -1.57120100 |
| O                       | 1.09884800  | 2.50943000  | 0.23675500  |
| H                       | 2.15002300  | 2.03978900  | 0.46673900  |
| N                       | -1.79376200 | 1.34148900  | -0.90827700 |
| H                       | -2.71400100 | 1.49029000  | -1.33989800 |
| O                       | -4.32220900 | 0.31436400  | -0.68666100 |
| O                       | -4.33977900 | 0.46938300  | 1.89198000  |
| H                       | -4.38996600 | -0.22381800 | 2.55890500  |
| O                       | -3.24503300 | -1.50601300 | 0.90622800  |
| H                       | -1.41226400 | 0.46162300  | -1.34487100 |

**9- Structures and energetics of transition states (TS) for DZP<sub>9</sub> and AC<sub>9</sub> conversions in cyclohexane at SMD-B3LYP-D3/6-311++G(2d,2p) level.**

Structure of TS<sub>1</sub> in cyclohexane at SMD-B3LYP-D3/6-311++G(2d,2p).

E(SCF) = -1783.47353191 u.a. ; Zero-point correction = 0.268771 u.a. ; G = -1783.256299 u.a. at 298,15K.

Charge = 0; Multiplicity = 1

| Coordinates (Angstroms) |             |             |             |
|-------------------------|-------------|-------------|-------------|
|                         | X           | Y           | Z           |
| P                       | -3.62746800 | -0.06924900 | 0.52835900  |
| C                       | -2.10712600 | 0.99715500  | 0.55118900  |
| H                       | -1.23686300 | 0.49083200  | 0.95674900  |
| H                       | -2.31334900 | 1.88801500  | 1.13839900  |
| C                       | -0.87573400 | 2.57000600  | -0.99671600 |
| H                       | -0.94778000 | 2.93779900  | -2.01757200 |
| H                       | -1.16362700 | 3.34614900  | -0.29577800 |
| C                       | 0.54676400  | 2.06311100  | -0.76160600 |
| O                       | 0.98689600  | 1.19430900  | -1.50277200 |
| O                       | 1.15574100  | 2.59636900  | 0.24564500  |
| H                       | 2.11710800  | 2.13190600  | 0.41430400  |
| N                       | -1.81748100 | 1.41725800  | -0.85791400 |
| H                       | -2.72705100 | 1.60553000  | -1.29575600 |
| O                       | -4.35940200 | 0.35690600  | -0.68987600 |
| O                       | -4.37360800 | 0.39084800  | 1.88513500  |
| H                       | -4.40021500 | -0.32651000 | 2.52889100  |
| O                       | -3.25256800 | -1.53424300 | 0.77746600  |
| H                       | -1.43729600 | 0.57643400  | -1.33976900 |
| P                       | 3.63612100  | 0.04906600  | 0.53654100  |
| C                       | 2.08011500  | -0.97419300 | 0.52802400  |
| H                       | 1.21236500  | -0.44318200 | 0.90668300  |
| H                       | 2.24300000  | -1.86902800 | 1.12226900  |
| C                       | 0.87031300  | -2.54339900 | -1.03629000 |
| H                       | 0.93244100  | -2.89837000 | -2.06269300 |
| H                       | 1.15861500  | -3.33060200 | -0.34833100 |
| C                       | -0.54752200 | -2.02688700 | -0.77543300 |
| O                       | -0.92433000 | -1.06769000 | -1.45949800 |
| O                       | -1.20367000 | -2.61722000 | 0.14095600  |
| H                       | -2.25701100 | -2.06071000 | 0.39860500  |
| N                       | 1.81947700  | -1.39911800 | -0.88630200 |
| H                       | 2.74445000  | -1.59141000 | -1.29347000 |
| O                       | 4.38122000  | -0.44520800 | -0.65412100 |
| O                       | 4.32945700  | -0.45039300 | 1.91716700  |
| H                       | 4.37555500  | 0.27590300  | 2.54915600  |
| O                       | 3.29788200  | 1.51411200  | 0.74119400  |
| H                       | 1.45409000  | -0.57406600 | -1.39106000 |

Structure of TS<sub>2</sub> in cyclohexane at SMD-B3LYP-D3/6-311++G(2d,2p).

E(SCF) = -1783.47345810 u.a. ; Zero-point correction = 0.267610 u.a. ; G = -1783.259166 u.a.  
at 298,15K.

Charge = 0; Multiplicity = 1

|   | Coordinates (Angstroms) |             |             |
|---|-------------------------|-------------|-------------|
|   | X                       | Y           | Z           |
| P | 3.56640200              | 0.09840500  | 0.62135200  |
| C | 2.08906200              | -1.01431900 | 0.49274500  |
| H | 1.18534300              | -0.56356100 | 0.89085600  |
| H | 2.29521100              | -1.93423400 | 1.03326000  |
| C | 0.93264900              | -2.50355100 | -1.17300800 |
| H | 0.98063600              | -2.76862600 | -2.22676900 |
| H | 1.25029200              | -3.33768000 | -0.55637200 |
| C | -0.48970800             | -2.03320400 | -0.83164300 |
| O | -0.88254400             | -1.04027800 | -1.48334100 |
| O | -1.10831700             | -2.64969500 | 0.06737800  |
| H | -2.27740400             | -1.94385800 | 0.56306500  |
| N | 1.86886100              | -1.35719800 | -0.94817700 |
| H | 2.79465000              | -1.52655300 | -1.35486100 |
| O | 4.39829200              | -0.22483700 | -0.56287700 |
| O | 4.25020700              | -0.40990400 | 1.99702400  |
| H | 4.17753600              | 0.25951300  | 2.68686500  |
| O | 3.09973000              | 1.52690900  | 0.92664100  |
| H | 1.50668600              | -0.50183600 | -1.41596700 |
| P | -3.57691900             | -0.06353800 | 0.59320800  |
| C | -2.19033200             | 1.15212100  | 0.48033000  |
| H | -1.30182200             | 0.82689300  | 1.01288400  |
| H | -2.52313700             | 2.09912600  | 0.89820100  |
| C | -0.87826400             | 2.45598400  | -1.24420500 |
| H | -0.90794300             | 2.64863800  | -2.31257000 |
| H | -1.17753800             | 3.33779300  | -0.68628400 |
| C | 0.52841900              | 1.97802300  | -0.86172200 |
| O | 1.11113600              | 1.21457000  | -1.63378200 |
| O | 0.95437000              | 2.39483900  | 0.27106200  |
| H | 2.04155100              | 1.95470800  | 0.55267300  |
| N | -1.85461200             | 1.35468900  | -0.96185100 |
| H | -2.73387600             | 1.50437900  | -1.46223300 |
| O | -4.33171600             | 0.04325300  | -0.67182000 |
| O | -4.37363300             | 0.45764100  | 1.88810200  |
| H | -4.38239300             | -0.19263300 | 2.60037800  |
| O | -3.03537000             | -1.43881400 | 1.08466400  |
| H | -1.47795800             | 0.43269300  | -1.31072200 |

**10- Structures and energetics of transition states (TS) involved in DZP $\rightleftharpoons$ AC $\rightleftharpoons$ DZC tautomerization processes of Glyph dimers in aqueous solution at SMD-B3LYP-D3/6-311++G(2d,2p) level.**

Structure of TS<sub>1</sub> in aqueous solution at SMD-B3LYP-D3/6-311++G(2d,2p).

E(SCF) = -1783.54629517 u.a. ; Zero-point correction = 0.269941 u.a. ; G = -1783.326452 u.a. at 298,15K.

Charge = 0; Multiplicity = 1

| Coordinates (Angstroms) |             |             |             |
|-------------------------|-------------|-------------|-------------|
|                         | X           | Y           | Z           |
| P                       | 3.48053800  | -0.16423400 | 0.22181200  |
| C                       | 2.40566500  | 0.94326300  | -0.76281400 |
| H                       | 1.47458000  | 0.41469100  | -0.95456100 |
| H                       | 2.87825500  | 1.19412300  | -1.70779000 |
| C                       | 0.94838200  | 2.97423700  | -0.65629400 |
| H                       | 0.97986600  | 3.99927600  | -0.29150400 |
| H                       | 1.05883400  | 2.97339400  | -1.73559700 |
| C                       | -0.35981200 | 2.34432900  | -0.22630800 |
| O                       | -0.41103400 | 1.61699500  | 0.75794100  |
| O                       | -1.36276900 | 2.67941400  | -0.98973200 |
| H                       | -2.24282200 | 2.19472900  | -0.73347000 |
| N                       | 2.08231300  | 2.21869700  | -0.04586400 |
| H                       | 2.91300900  | 2.81262100  | -0.02050600 |
| O                       | 3.48796100  | -1.48788700 | -0.57437800 |
| O                       | 2.64104400  | -0.37325900 | 1.56911400  |
| H                       | 1.79316400  | -0.85792300 | 1.36957400  |
| O                       | 4.80394000  | 0.44696400  | 0.52811100  |
| H                       | 1.82743200  | 2.00299300  | 0.92390300  |
| P                       | -3.51292600 | 0.14995600  | 0.20019000  |
| C                       | -2.37007400 | -0.90548100 | -0.77063100 |
| H                       | -1.43899000 | -0.36285100 | -0.91105100 |
| H                       | -2.79972600 | -1.14005800 | -1.74018800 |
| C                       | -0.91778700 | -2.94220400 | -0.68486400 |
| H                       | -0.95286100 | -3.97029000 | -0.32963700 |
| H                       | -1.02601600 | -2.93108400 | -1.76424700 |
| C                       | 0.39857400  | -2.31919800 | -0.24964600 |
| O                       | 0.41394800  | -1.60537800 | 0.76617500  |
| O                       | 1.39831700  | -2.61999000 | -0.98763200 |
| H                       | 2.44460700  | -2.03843200 | -0.72476800 |
| N                       | -2.05721800 | -2.19419700 | -0.07431500 |
| H                       | -2.89113400 | -2.78333000 | -0.06298100 |
| O                       | -3.55147000 | 1.48121500  | -0.53506600 |
| O                       | -2.70888100 | 0.32366000  | 1.59407300  |
| H                       | -1.88158300 | 0.83100900  | 1.43637300  |
| O                       | -4.79223000 | -0.57114500 | 0.49167200  |
| H                       | -1.80675900 | -1.99059100 | 0.89881100  |

Structure of TS<sub>2</sub> in aqueous solution at SMD-B3LYP-D3/6-311++G(2d,2p).

E(SCF) = -1783.54606622 u.a. ; Zero-point correction = 0.268945 u.a. ; G = -1783.326885 u.a.  
at 298,15K.

Charge = 0; Multiplicity = 1

|   | Coordinates (Angstroms) |             |             |
|---|-------------------------|-------------|-------------|
|   | X                       | Y           | Z           |
| P | 3.46117900              | -0.10794400 | 0.25747400  |
| C | 2.39810200              | 0.97236400  | -0.76228000 |
| H | 1.48310200              | 0.42503200  | -0.98027200 |
| H | 2.89847100              | 1.22444400  | -1.69259600 |
| C | 0.89166900              | 2.96525100  | -0.69970600 |
| H | 0.91100400              | 3.99986800  | -0.36352100 |
| H | 1.00968300              | 2.93385400  | -1.77769900 |
| C | -0.41721700             | 2.32960300  | -0.25944400 |
| O | -0.42182900             | 1.62275500  | 0.76048700  |
| O | -1.42120800             | 2.61410200  | -0.99839400 |
| H | -2.45519800             | 2.02981000  | -0.72348600 |
| N | 2.03445000              | 2.24326100  | -0.06117500 |
| H | 2.85229200              | 2.85343400  | -0.02190600 |
| O | 3.60646600              | -1.40558200 | -0.62121900 |
| O | 2.57097000              | -0.45133300 | 1.51988100  |
| H | 1.71669700              | -0.93931700 | 1.25534100  |
| O | 4.75582900              | 0.51646600  | 0.62806900  |
| H | 1.75380000              | 2.02920900  | 0.90211400  |
| P | -3.46766100             | 0.13945500  | 0.22946900  |
| C | -2.38215600             | -0.94776600 | -0.76505900 |
| H | -1.45498300             | -0.41134500 | -0.95412600 |
| H | -2.85574000             | -1.19173100 | -1.71150200 |
| C | -0.91510700             | -2.97227400 | -0.69428100 |
| H | -0.95418400             | -4.00202400 | -0.34520500 |
| H | -1.03915900             | -2.95241700 | -1.77179600 |
| C | 0.41829500              | -2.36226200 | -0.27426500 |
| O | 0.41289400              | -1.63679000 | 0.75327200  |
| O | 1.41250000              | -2.66414500 | -0.98361700 |
| H | 2.72785800              | -1.92723700 | -0.73879300 |
| N | -2.04685000             | -2.22476200 | -0.06210000 |
| H | -2.87682700             | -2.81790800 | -0.02127200 |
| O | -3.49778900             | 1.46911200  | -0.55593200 |
| O | -2.62923400             | 0.35254900  | 1.57821300  |
| H | -1.78952200             | 0.84847300  | 1.37916600  |
| O | -4.78126800             | -0.49265500 | 0.53859900  |
| H | -1.76343600             | -2.00962000 | 0.89967100  |

Structure of TS<sub>3</sub> in aqueous solution at SMD-B3LYP-D3/6-311++G(2d,2p).

E(SCF) = -1783.54502764 u.a. ; Zero-point correction = 0.270209 u.a. ; G = -1783.324659 u.a.  
at 298,15K.

Charge = 0; Multiplicity = 1

|   | Coordinates (Angstroms) |             |             |
|---|-------------------------|-------------|-------------|
|   | X                       | Y           | Z           |
| P | 3.45511300              | -0.11958500 | 0.28153000  |
| C | 2.41495100              | 0.99318500  | -0.73749100 |
| H | 1.50175200              | 0.45686100  | -0.98724000 |
| H | 2.93154700              | 1.27476500  | -1.64998600 |
| C | 0.91511100              | 2.99473200  | -0.64054400 |
| H | 0.93508300              | 4.02263500  | -0.28323600 |
| H | 1.03928800              | 2.98589300  | -1.71836400 |
| C | -0.39334700             | 2.35851000  | -0.22163000 |
| O | -0.44723300             | 1.63087500  | 0.76257100  |
| O | -1.39267400             | 2.68722700  | -0.99210000 |
| H | -2.26984500             | 2.19337400  | -0.74289100 |
| N | 2.04311200              | 2.24897700  | -0.00818900 |
| H | 2.86329200              | 2.85443200  | 0.05207300  |
| O | 3.71604900              | -1.33364500 | -0.72101800 |
| O | 2.53396300              | -0.60347400 | 1.42357800  |
| H | 1.49181900              | -1.13634100 | 1.06017900  |
| O | 4.73325100              | 0.53118500  | 0.68882700  |
| H | 1.75900400              | 2.01641100  | 0.94958400  |
| P | -3.51429400             | 0.13136600  | 0.18722000  |
| C | -2.33792200             | -0.90778300 | -0.76121000 |
| H | -1.40889000             | -0.35760200 | -0.88366800 |
| H | -2.74633900             | -1.14884900 | -1.73837200 |
| C | -0.89850700             | -2.95960000 | -0.65695700 |
| H | -0.94105500             | -3.97890100 | -0.27749600 |
| H | -1.02020300             | -2.97475400 | -1.73479600 |
| C | 0.44696300              | -2.36616900 | -0.27917600 |
| O | 0.44500200              | -1.61337600 | 0.76016300  |
| O | 1.42914400              | -2.67082800 | -0.96899300 |
| H | 2.89839700              | -1.89734100 | -0.81889500 |
| N | -2.03125500             | -2.19231800 | -0.05435800 |
| H | -2.86885700             | -2.77714800 | -0.04498700 |
| O | -3.56711000             | 1.46035100  | -0.55085600 |
| O | -2.73409900             | 0.32100900  | 1.59261500  |
| H | -1.91069100             | 0.83705900  | 1.44338300  |
| O | -4.78375300             | -0.61377700 | 0.46058500  |
| H | -1.79340600             | -1.98542700 | 0.92035100  |

Structure of TS<sub>4</sub> in aqueous solution at SMD-B3LYP-D3/6-311++G(2d,2p).

E(SCF) = -1783.54390075 u.a. ; Zero-point correction = 0.269707 u.a. ; G = -1783.324466 u.a. at 298,15K.

Charge = 0; Multiplicity = 1

|   | Coordinates (Angstroms) |             |             |
|---|-------------------------|-------------|-------------|
|   | X                       | Y           | Z           |
| P | -3.48937900             | 0.07610800  | 0.25336600  |
| C | -2.37888200             | -1.00865000 | -0.72558600 |
| H | -1.47336700             | -0.44993100 | -0.95125600 |
| H | -2.85572200             | -1.31796500 | -1.65069700 |
| C | -0.85937400             | -2.99216200 | -0.59041500 |
| H | -0.87359700             | -4.01216200 | -0.21124600 |
| H | -0.99225000             | -3.00694100 | -1.66677500 |
| C | 0.45840800              | -2.34464100 | -0.19838600 |
| O | 0.48907100              | -1.61210200 | 0.80360200  |
| O | 1.44482300              | -2.64717900 | -0.95394000 |
| H | 2.48039700              | -2.03354900 | -0.73979900 |
| N | -1.99217400             | -2.24254900 | 0.03067900  |
| H | -2.80691800             | -2.85235900 | 0.11155900  |
| O | -3.74930200             | 1.27529400  | -0.78808800 |
| O | -2.64808200             | 0.59106600  | 1.41882700  |
| H | -1.38859900             | 1.23478600  | 1.03294400  |
| O | -4.78192300             | -0.61426700 | 0.55780400  |
| H | -1.70090000             | -1.98034700 | 0.97872900  |
| P | 3.49659100              | -0.12645100 | 0.16427200  |
| C | 2.33180900              | 0.95057200  | -0.74795500 |
| H | 1.40140300              | 0.40386600  | -0.88037400 |
| H | 2.73833400              | 1.21405700  | -1.71990400 |
| C | 0.90323800              | 3.00609500  | -0.58273100 |
| H | 0.95076700              | 4.01388800  | -0.17377000 |
| H | 1.02518900              | 3.05378300  | -1.65947300 |
| C | -0.45053300             | 2.42318300  | -0.23709100 |
| O | -0.44917900             | 1.64187500  | 0.80615900  |
| O | -1.42865600             | 2.73151100  | -0.90801500 |
| H | -2.96450600             | 1.87092800  | -0.83727000 |
| N | 2.03439400              | 2.21619100  | -0.00362200 |
| H | 2.87272300              | 2.80099500  | 0.00964000  |
| O | 3.51180600              | -1.44383000 | -0.64037100 |
| O | 2.73416400              | -0.37237700 | 1.55157600  |
| H | 1.88448300              | -0.86445400 | 1.38317300  |
| O | 4.80978400              | 0.53351600  | 0.40784100  |
| H | 1.81080400              | 1.99061600  | 0.97037800  |

Structure of TS<sub>5</sub> in aqueous solution at SMD-B3LYP-D3/6-311++G(2d,2p).

E(SCF) = -1783.54468550 u.a. ; Zero-point correction = 0.268777 u.a. ; G = -1783.326633 u.a.  
at 298,15K.

Charge = 0; Multiplicity = 1

|   | Coordinates (Angstroms) |             |             |
|---|-------------------------|-------------|-------------|
|   | X                       | Y           | Z           |
| P | -3.45288600             | 0.07691100  | 0.25966400  |
| C | -2.37032300             | -1.01851700 | -0.73175500 |
| H | -1.46387700             | -0.46722400 | -0.97334500 |
| H | -2.86869000             | -1.31582100 | -1.64961700 |
| C | -0.85770100             | -3.00760700 | -0.62934000 |
| H | -0.88362700             | -4.03312100 | -0.26677100 |
| H | -0.99719500             | -3.00221700 | -1.70499600 |
| C | 0.47679100              | -2.38327800 | -0.23584800 |
| O | 0.48377800              | -1.65129600 | 0.78711700  |
| O | 1.46114400              | -2.68126900 | -0.96099900 |
| H | 2.75833200              | -1.90911900 | -0.76920900 |
| N | -1.98381300             | -2.25888900 | 0.01058500  |
| H | -2.80101700             | -2.86428200 | 0.09780700  |
| O | -3.72494300             | 1.27850400  | -0.75712200 |
| O | -2.56877500             | 0.59259700  | 1.41644800  |
| H | -1.52150100             | 1.14183800  | 1.06518100  |
| O | -4.72511500             | -0.59955600 | 0.64558700  |
| H | -1.67232800             | -2.00649100 | 0.95489400  |
| P | 3.47332300              | -0.07463500 | 0.21105600  |
| C | 2.32044500              | 0.97830100  | -0.73626400 |
| H | 1.40291700              | 0.41598000  | -0.89512300 |
| H | 2.75514500              | 1.24156700  | -1.69602600 |
| C | 0.85089700              | 3.00204600  | -0.61954000 |
| H | 0.88248400              | 4.01923100  | -0.23392800 |
| H | 0.98295300              | 3.02286200  | -1.69603400 |
| C | -0.49084800             | 2.39262800  | -0.25495000 |
| O | -0.48429300             | 1.62780900  | 0.77662300  |
| O | -1.47249200             | 2.69464800  | -0.94476600 |
| H | -2.92434200             | 1.86680100  | -0.83557800 |
| N | 1.98521700              | 2.24144900  | -0.00782800 |
| H | 2.81354500              | 2.83897400  | 0.02464600  |
| O | 3.62341300              | -1.35688500 | -0.68739400 |
| O | 2.66162300              | -0.46402500 | 1.51360900  |
| H | 1.80347600              | -0.95728000 | 1.27908600  |
| O | 4.75980900              | 0.59643700  | 0.52414400  |
| H | 1.72857900              | 2.01909700  | 0.95910700  |



Structure of TS<sub>6</sub> in aqueous solution at SMD-B3LYP-D3/6-311++G(2d,2p).

E(SCF) = -1783.54259744 u.a. ; Zero-point correction = 0.270085 u.a. ; G = -1783.322785 u.a.  
at 298,15K.

Charge = 0; Multiplicity = 1

| Coordinates (Angstroms) |             |             |             |
|-------------------------|-------------|-------------|-------------|
|                         | X           | Y           | Z           |
| P                       | -3.49040200 | 0.06459200  | 0.21744700  |
| C                       | -2.33299800 | -1.02029900 | -0.70585100 |
| H                       | -1.42153600 | -0.46112900 | -0.90452600 |
| H                       | -2.77326800 | -1.34544100 | -1.64356200 |
| C                       | -0.85175100 | -3.03358000 | -0.51294500 |
| H                       | -0.87372000 | -4.03143200 | -0.07861500 |
| H                       | -1.00613000 | -3.10802700 | -1.58386100 |
| C                       | 0.49918800  | -2.41336700 | -0.20530800 |
| O                       | 0.52497600  | -1.62935100 | 0.81124700  |
| O                       | 1.46141700  | -2.72767700 | -0.91829700 |
| H                       | 2.90336200  | -1.87109600 | -0.88389400 |
| N                       | -1.97222400 | -2.24231300 | 0.08234300  |
| H                       | -2.79864800 | -2.83733200 | 0.16372700  |
| O                       | -3.73271700 | 1.24521900  | -0.84872000 |
| O                       | -2.69558400 | 0.60705600  | 1.40263900  |
| H                       | -1.43072300 | 1.25723500  | 1.04140100  |
| O                       | -4.78127700 | -0.64301300 | 0.48729600  |
| H                       | -1.69857800 | -1.96699000 | 1.03079600  |
| P                       | 3.47179700  | -0.08747200 | 0.20337400  |
| C                       | 2.33802000  | 1.01900900  | -0.71639300 |
| H                       | 1.41783100  | 0.47306900  | -0.91358600 |
| H                       | 2.78516700  | 1.32842400  | -1.65619700 |
| C                       | 0.87937900  | 3.04998500  | -0.52071900 |
| H                       | 0.91378000  | 4.04962000  | -0.09096400 |
| H                       | 1.02149500  | 3.11946900  | -1.59372900 |
| C                       | -0.47690200 | 2.45363300  | -0.20949700 |
| O                       | -0.48954700 | 1.66656100  | 0.82992000  |
| O                       | -1.44440200 | 2.75734700  | -0.89748800 |
| H                       | -2.96074100 | 1.85896200  | -0.87288600 |
| N                       | 2.00157700  | 2.25264600  | 0.06512100  |
| H                       | 2.83383700  | 2.84326600  | 0.12136300  |
| O                       | 3.69844300  | -1.27088400 | -0.84360800 |
| O                       | 2.64061100  | -0.62301600 | 1.39068200  |
| H                       | 1.58345000  | -1.15509600 | 1.07468300  |
| O                       | 4.75530600  | 0.59137500  | 0.54193300  |
| H                       | 1.75060600  | 1.99613700  | 1.02472500  |
